# Supplementary material for: New tertiary amine-derived C2-symmetric chiral pyridine-N,N′-dioxide ligands and their applications in asymmetric catalysis
Source: Royal Society of Chemistry journal article supplement (doi:10.1039/d2qo01508k), 2022-01-01

## New tertiary amine-derived C<sub>2</sub>-symmetric chiral pyridine-*N,N'*-dioxide ligands and their applications in asymmetric catalysis

Ren-Ming Liu<sup>a,c</sup>, Yu-Heng Wang<sup>a,c</sup>, Zi-Yue Chen<sup>a,c</sup>, Lei Zhang<sup>a,c</sup>, Qing-Hui Shi<sup>a</sup>, Ying Zhou,<sup>b</sup>  
You-Ping Tian<sup>b</sup>, Xiong-Li Liu<sup>a,\*</sup>

<sup>a</sup> National & Local Joint Engineering Research Center for the Exploitation of Homology Resources of Southwest Medicine and Food, Guizhou University, Guiyang, 550025, China.

<sup>b</sup> College of Pharmaceutical Sciences, Guizhou University of Traditional Chinese Medicine, Guiyang, 550025.

<sup>c</sup> These four authors contributed equally to this work.

\*E-mail address: xlliu1@gzu.edu.cn

### Table of Contents

|                                                                                                                      |     |
|----------------------------------------------------------------------------------------------------------------------|-----|
| Table of contents.....                                                                                               | S1  |
| 1. General experimental information.....                                                                             | S2  |
| 2. General procedure for preparation of chiral Py-2NO ligands <b>L1</b> .....                                        | S2  |
| 3. Characterization data of Py-2NO ligands <b>L1</b> .....                                                           | S2  |
| 4. General procedure for preparation of chiral Py-NO ligands <b>L2</b> .....                                         | S5  |
| 5. Characterization data of Py-NO ligands <b>L2</b> .....                                                            | S6  |
| 6. General procedure for preparation of chiral ligand <b>L4a</b> .....                                               | S7  |
| 7. Characterization data of chiral ligand <b>L4a</b> .....                                                           | S8  |
| 8. General procedure for preparation of chiral ligand <b>L6a</b> .....                                               | S8  |
| 9. Characterization data of chiral ligand <b>L6a</b> .....                                                           | S9  |
| 10. Table S1: optimization of reaction conditions for synthesis of compound <b>6a</b> .....                          | S9  |
| 11. Characterization data of compounds <b>6</b> .....                                                                | S10 |
| 12. Characterization data of compounds <b>6</b> .....                                                                | S10 |
| 13. The gram scale synthesis of the ligand <b>L1a</b> .....                                                          | S19 |
| 14. The preparative gram scale asymmetric synthesis of the product <b>6a</b> .....                                   | S19 |
| 15. Control experiments and HPLC spectra for compound <b>6a</b> .....                                                | S20 |
| 16. X-ray crystal data for compounds <b>L2b</b> , <b>L2c</b> and <b>3d</b> .....                                     | S23 |
| 17. The copies of <sup>1</sup> H NMR, <sup>13</sup> C NMR and HPLC spectra for compounds <b>L</b> and <b>6</b> ..... | S26 |

## 1. General information

Reactions were monitored by thin layer chromatography using UV light to visualize the course of reaction. Purification of reaction products was carried out by flash chromatography.  $^1\text{H}$  and  $^{13}\text{C}$ NMR spectra were obtained using a Bruker DPX-400 spectrometer.  $^1\text{H}$  NMR chemical shifts are reported in ppm ( $\delta$ ) relative to tetramethylsilane (TMS) with the solvent resonance employed as the internal standard. Data are reported as follows: chemical shift, multiplicity (s = singlet, d = doublet, t = triplet, m = multiplet), coupling constants (Hz) and integration.  $^{13}\text{C}$  NMR chemical shifts are reported in ppm ( $\delta$ ) from tetramethylsilane (TMS) with the solvent resonance as the internal standard. Melting points were measured on an electrothermal digital melting point apparatus.

## 2. General procedure for preparation of chiral Py-2NO ligands L1

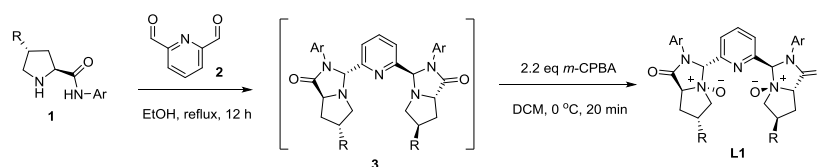

In a sealed tube equipped with a magnetic stirring bar, pyridine-2,6-dicarbaldehyde **2** (1.0 mmol) and optically pure 4-hydroxyprolinamide or prolinamide **1** (2.4 mmol, 2.4 equiv) were added. Then, anhydrous ethanol (6.0 mL) was added and the reaction was heated with stirring at reflux for 12 h. After completion of the reaction, as indicated by TLC, the aftertreatment residue was purified by flash column chromatography to give the intermediate **3**.

For the oxidation step, see: X. Liu, L. Lin and X. Feng, Chiral  $N,N'$ -dioxide ligands: synthesis, coordination chemistry and asymmetric catalysis, *Org. Chem. Front.*, 2014, **1**, 298-302. In a sealed tube equipped with a magnetic stirring bar, to the intermediate **3** was added 3.0 mL of DCM and *m*-CPBA (2.2 eq). The reaction mixture was stirred at 0 °C for 20 min. After completion of the reaction, as indicated by TLC, the aftertreatment residue was purified by flash column chromatography to furnish the Py-2NO ligand **L1**.

## 3. Characterization data of Py-2NO ligands L1

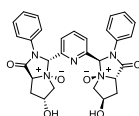

**L1a:** White solid, m.p. 249.1-249.3 °C; yield 61%, >20:1 dr; <sup>1</sup>H NMR (CDCl<sub>3</sub>, 400 MHz) δ: 2.53-2.60 (m, 4H), 3.80-3.84 (m, 2H), 3.96 (d, *J* = 10.8 Hz, 2H), 4.14-4.17 (m, 2H), 4.51-4.53 (m, 2H), 6.05 (s, 2H), 7.19-7.25 (m, 8H), 7.68 (d, *J* = 7.6 Hz, 2H), 7.89-7.92 (m, 1H); <sup>13</sup>C NMR (CDCl<sub>3</sub>, 100 MHz) δ: 35.7, 70.2, 73.5, 75.0, 86.0, 122.3, 127.5, 128.6, 131.6, 132.4, 136.7, 148.5, 167.0; HRMS (ESI-TOF) m/z: Calcd. for C<sub>29</sub>H<sub>29</sub>N<sub>5</sub>NaO<sub>6</sub> [M+Na]<sup>+</sup>: 566.2008; Found: 566.2002.

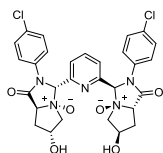

**L1b:** White solid, m.p. 245.3-245.6 °C; yield 59%, >20:1 dr; <sup>1</sup>H NMR (CDCl<sub>3</sub>, 400 MHz) δ: 2.50-2.61 (m, 4H), 3.80-3.84 (m, 2H), 3.96 (d, *J* = 10.8 Hz, 2H), 4.14-4.17 (m, 2H), 4.51-4.53 (m, 2H), 6.05 (s, 2H), 7.19-7.24 (m, 8H), 7.68 (d, *J* = 7.6 Hz, 2H), 7.89-7.92 (m, 1H); <sup>13</sup>C NMR (CDCl<sub>3</sub>, 100 MHz) δ: 35.7, 70.2, 73.5, 75.0, 86.0, 122.3, 127.5, 128.6, 131.6, 132.4, 136.7, 148.5, 167.0; HRMS (ESI-TOF) m/z: Calcd. for C<sub>29</sub>H<sub>27</sub>Cl<sub>2</sub>N<sub>5</sub>NaO<sub>6</sub> [M+Na]<sup>+</sup>: 634.1228; Found: 634.1220.

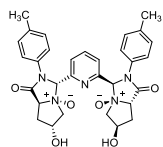

**L1c:** White solid, m.p. 248.6-249.5 °C; yield 60%, 18:1 dr; <sup>1</sup>H NMR (DMSO-*d*<sub>6</sub>, 400 MHz) δ: 2.23 (s, 6H), 2.31-2.36 (m, 2H), 2.43-2.48 (m, 2H), 3.72 (d, *J* = 8.4 Hz, 2H), 4.14-4.18 (m, 2H), 4.35-4.39 (m, 2H), 4.44 (s, 2H), 6.79 (s, 2H), 7.10 (d, *J* = 8.4 Hz, 4H), 7.36 (d, *J* = 8.4 Hz, 4H), 7.59 (d, *J* = 8.0 Hz, 2H), 7.84-7.88 (m, 1H); <sup>13</sup>C NMR (DMSO-*d*<sub>6</sub>, 100 MHz) δ: 20.9, 36.4, 70.9, 74.9, 76.7, 86.8, 124.5, 128.7, 129.9, 133.4, 136.9, 151.1, 168.8; HRMS (ESI-TOF) m/z: Calcd. for C<sub>31</sub>H<sub>33</sub>N<sub>5</sub>NaO<sub>6</sub> [M+Na]<sup>+</sup>: 594.2323; Found: 594.2325.

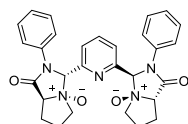

**L1d:** White solid, m.p. 223.5-224.0 °C; yield 62%, >20:1 dr; <sup>1</sup>H NMR (CDCl<sub>3</sub>, 400 MHz) δ: 1.97-2.03 (m, 2H), 2.25-2.36 (m, 4H), 2.46-2.54 (m, 2H), 3.80-3.85 (m, 6H), 6.08 (s, 2H), 7.06-7.10 (m, 2H), 7.19-7.23 (m, 4H), 7.31-7.33 (m, 4H), 7.67 (d, *J* = 7.6 Hz, 2H), 7.75-7.79 (m,

1H);  $^{13}\text{C}$  NMR ( $\text{CDCl}_3$ , 100 MHz)  $\delta$ : 21.7, 23.7, 70.4, 86.8, 120.8, 125.6, 127.2, 128.4, 134.5, 136.6, 149.3, 167.5; HRMS (ESI-TOF)  $m/z$ : Calcd. for  $\text{C}_{29}\text{H}_{29}\text{N}_5\text{NaO}_4$   $[\text{M}+\text{Na}]^+$ : 534.2112; Found: 534.2107.

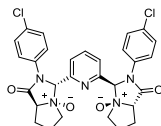

**L1e**: White solid, m.p. 260.5-260.9 °C; yield 60%, 18:1 dr;  $^1\text{H}$  NMR ( $\text{DMSO-}d_6$ , 400 MHz)  $\delta$ : 1.99-2.02 (m, 2H), 2.12-2.15 (m, 2H), 2.23-2.33 (m, 4H), 3.62-3.66 (m, 2H), 3.86 (d,  $J = 6.0$  Hz, 2H), 3.96-4.04 (m, 2H), 6.81 (s, 2H), 7.36-7.38 (m, 4H), 7.54-7.57 (m, 4H), 7.61 (d,  $J = 7.6$  Hz, 2H), 7.83-7.87 (m, 1H);  $^{13}\text{C}$  NMR ( $\text{DMSO-}d_6$ , 100 MHz)  $\delta$ : 22.9, 24.7, 71.7, 77.4, 86.8, 125.2, 128.7, 129.4, 130.9, 135.1, 137.0, 151.1, 169.5; HRMS (ESI-TOF)  $m/z$ : Calcd. for  $\text{C}_{29}\text{H}_{27}\text{Cl}_2\text{N}_5\text{NaO}_4$   $[\text{M}+\text{Na}]^+$ : 602.1332; Found: 602.1330.

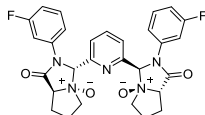

**L1f**: White solid, m.p. m.p. 272.5-273.4 °C; yield 27%, 12:1 dr;  $^1\text{H}$  NMR ( $\text{DMSO-}d_6$ , 400 MHz)  $\delta$ : 1.98-2.00 (m, 2H), 2.12-2.20 (m, 4H), 2.25-2.30 (m, 2H), 3.62-3.66 (m, 4H), 3.93-4.01 (m, 2H), 6.89 (s, 2H), 7.00-7.04 (m, 2H), 7.30-7.37 (m, 4H), 7.59 (d,  $J = 7.2$  Hz, 2H), 7.65 (d,  $J = 7.6$  Hz, 2H), 7.85-7.89 (m, 1H);  $^{13}\text{C}$  NMR ( $\text{DMSO-}d_6$ , 100 MHz)  $\delta$ : 22.8, 24.5, 71.4, 77.3, 86.4, 109.9 (d,  $J_{\text{CF}} = 26.2$  Hz), 113.3 (d,  $J_{\text{CF}} = 21.1$  Hz), 118.5, 129.0, 131.1 (d,  $J_{\text{CF}} = 9.0$  Hz), 136.8, 137.9 (d,  $J_{\text{CF}} = 10.1$  Hz), 150.5, 162.7 (d,  $J_{\text{CF}} = 242.3$  Hz), 169.3; HRMS (ESI-TOF)  $m/z$ : Calcd. for  $\text{C}_{29}\text{H}_{27}\text{F}_2\text{N}_5\text{NaO}_4$   $[\text{M}+\text{Na}]^+$ : 570.1923; Found: 570.1918.

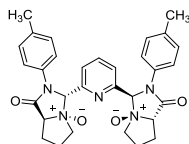

**L1g**: White solid, m.p. 268.2-268.9 °C; yield 60%, >20:1 dr;  $^1\text{H}$  NMR ( $\text{DMSO-}d_6$ , 400 MHz)  $\delta$ : 1.97-1.99 (m, 2H), 2.13-2.33 (m, 12H), 3.65-3.69 (m, 2H), 3.94-4.03 (m, 4H), 6.75 (s, 2H), 7.06 (d,  $J = 8.8$  Hz, 4H), 7.39 (d,  $J = 8.4$  Hz, 4H), 7.57 (d,  $J = 7.6$  Hz, 2H), 7.76-7.79 (m, 1H);  $^{13}\text{C}$  NMR ( $\text{DMSO-}d_6$ , 100 MHz)  $\delta$ : 21.0, 22.9, 24.6, 71.6, 77.4, 87.4, 123.9, 128.4, 129.9, 133.6, 136.4,

136.9, 151.5, 169.2; HRMS (ESI-TOF)  $m/z$ : Calcd. for  $C_{31}H_{33}N_5NaO_4$   $[M+Na]^+$ : 562.2425; Found: 562.2418.

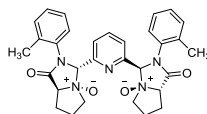

**L1h**: White solid, m.p. m.p. 240.5-241.7 °C; yield 42%, >20:1 dr;  $^1H$  NMR (DMSO- $d_6$ , 400 MHz)  $\delta$ : 2.07-2.15 (m, 4H), 2.29 (s, 6H), 2.34-2.37 (m, 4H), 3.80 (s, 2H), 4.10-4.17 (m, 2H), 4.55 (s, 2H), 6.54 (s, 2H), 6.86-6.89 (m, 2H), 7.14-7.25 (m, 6H), 7.42 (d,  $J = 7.6$  Hz, 2H), 7.70-7.74 (m, 1H);  $^{13}C$  NMR (DMSO- $d_6$ , 100 MHz)  $\delta$ : 18.5, 23.5, 25.6, 72.9, 77.7, 88.4, 127.6, 127.7, 129.2, 131.1, 133.9, 136.8, 137.6, 153.0, 170.4; HRMS (ESI-TOF)  $m/z$ : Calcd. for  $C_{31}H_{33}N_5NaO_4$   $[M+Na]^+$ : 562.2425; Found: 562.2419.

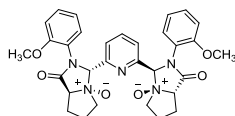

**L1i**: White solid, m.p. m.p. 243.1-241.4 °C; yield 45%, >20:1 dr;  $^1H$  NMR (DMSO- $d_6$ , 400 MHz)  $\delta$ : 2.06-2.12 (m, 4H), 2.34-2.36 (m, 4H), 3.78-3.82 (m, 2H), 3.84 (s, 6H), 4.20-4.26 (m, 2H), 4.54-4.55 (m, 2H), 6.31 (s, 2H), 6.67-6.71 (m, 2H), 7.08-7.10 (m, 2H), 7.13 (s, 2H), 7.25-7.29 (m, 2H), 7.50 (d,  $J = 3.6$  Hz, 2H), 7.68-7.72 (m, 1H);  $^{13}C$  NMR (DMSO- $d_6$ , 100 MHz)  $\delta$ : 23.0, 25.3, 56.4, 72.2, 77.4, 87.7, 112.5, 121.3, 122.8, 127.6, 130.6, 131.0, 137.4, 152.6, 155.8, 170.2; HRMS (ESI-TOF)  $m/z$ : Calcd. for  $C_{31}H_{33}N_5NaO_6$   $[M+Na]^+$ : 594.2323; Found: 594.2331.

#### 4. General procedure for preparation of chiral Py-NO ligands L2

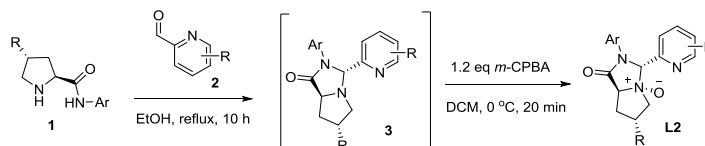

In a sealed tube equipped with a magnetic stirring bar, pyridine-2-carbaldehyde **2** (1.0 mmol) and optically pure 4-hydroxyprolinamide or prolinamide **1** (1.2 mmol, 1.2 equiv) were added. Then, anhydrous ethanol (6.0 mL) was added and the reaction was heated with stirring at reflux for 12 h. After completion of the reaction, as indicated by TLC, the aftertreatment residue was purified by flash column chromatography to give the intermediate **3**.

For the oxidation step, see: X. Liu, L. Lin and X. Feng, Chiral *N,N'*-dioxide ligands: synthesis, coordination chemistry and asymmetric catalysis, *Org. Chem. Front.*, 2014, **1**, 298-302. In a sealed tube equipped with a magnetic stirring bar, to the intermediate **3** was added 3.0 mL of DCM and *m*-CPBA (1.2 eq). The reaction mixture was stirred at 0 °C for 20 min. After completion of the reaction, as indicated by TLC, the aftertreatment residue was purified by flash column chromatography to furnish the Py-NO ligand **L2**.

## 5. Characterization data of Py-NO ligands **L2**

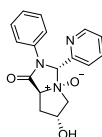

**L2a**: Light yellow solid, m.p. 145.7-146.6 °C; yield 68%, >20:1 dr; <sup>1</sup>H NMR (DMSO-*d*<sub>6</sub>, 400 MHz) δ: 2.50-2.54 (m, 2H), 3.74 (d, *J* = 9.2 Hz, 1H), 4.13-4.17 (m, 1H), 4.46 (d, *J* = 3.2 Hz, 1H), 4.76-4.80 (m, 1H), 6.75 (br s, 1H), 6.86 (s, 1H), 7.15-7.19 (m, 1H), 7.31-7.35 (m, 2H), 7.38-7.42 (m, 1H), 7.47-7.49 (m, 2H), 7.68 (d, *J* = 7.6 Hz, 1H), 7.83-7.87 (m, 1H), 8.60-8.61 (m, 1H); <sup>13</sup>C NMR (DMSO-*d*<sub>6</sub>, 100 MHz) δ: 36.9, 71.1, 75.0, 76.8, 86.6, 122.5, 125.1, 126.5, 127.8, 129.4, 136.3, 137.0, 149.7, 151.6, 169.2; HRMS (ESI-TOF) *m/z*: Calcd. for C<sub>17</sub>H<sub>17</sub>N<sub>3</sub>NaO<sub>3</sub> [M+Na]<sup>+</sup>: 334.1162; Found: 334.1166.

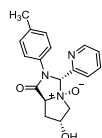

**L2b**: Light yellow solid, m.p. 152.5-153.1 °C; yield 65%, >20:1 dr; <sup>1</sup>H NMR (CDCl<sub>3</sub>, 400 MHz) δ: 2.19 (s, 3H), 2.65-2.68 (m, 2H), 3.84-3.88 (m, 1H), 3.95 (d, *J* = 9.2 Hz, 1H), 4.51 (s, 1H), 4.95-4.98 (m, 1H), 5.97 (s, 1H), 7.01 (d, *J* = 8.0 Hz, 2H), 7.10 (d, *J* = 8.8 Hz, 2H), 7.27-7.30 (m, 1H), 7.46 (d, *J* = 7.6 Hz, 1H), 7.67-7.71 (m, 1H), 8.61-8.63 (m, 1H); <sup>13</sup>C NMR (CDCl<sub>3</sub>, 100 MHz) δ: 21.0, 36.9, 71.5, 74.3, 76.5, 88.4, 122.7, 125.2, 126.4, 130.0, 132.6, 136.8, 137.2, 150.1, 150.2, 168.6; HRMS (ESI-TOF) *m/z*: Calcd. for C<sub>18</sub>H<sub>19</sub>N<sub>3</sub>NaO<sub>3</sub> [M+Na]<sup>+</sup>: 348.1319; Found: 348.1317.

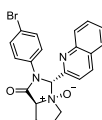

**L2c:** Light yellow solid, m.p. 154.3-154.7 °C; yield 64%, 18:1 dr;  $^1\text{H}$  NMR (DMSO- $d_6$ , 400 MHz)  $\delta$ : 2.09-2.13 (m, 1H), 2.24-2.31 (m, 1H), 2.40-2.53 (m, 2H), 3.77-3.81 (m, 1H), 4.06-4.13 (m, 1H), 4.52-4.55 (m, 1H), 7.07 (s, 1H), 7.52-7.65 (m, 5H), 7.74-7.79 (m, 1H), 7.84 (d,  $J = 8.4$  Hz, 1H), 7.97-8.00 (m, 2H), 8.39 (d,  $J = 8.4$  Hz, 1H);  $^{13}\text{C}$  NMR (DMSO- $d_6$ , 100 MHz)  $\delta$ : 23.1, 25.0, 71.7, 77.6, 87.0, 118.7, 124.4, 124.7, 127.8, 128.3, 128.5, 129.5, 130.4, 132.3, 136.0, 136.4, 147.1, 153.0, 169.9; HRMS (ESI-TOF)  $m/z$ : Calcd. for  $\text{C}_{21}\text{H}_{18}\text{BrN}_3\text{NaO}_2$   $[\text{M}+\text{Na}]^+$ : 446.0475; Found: 446.0476.

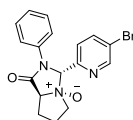

**L2d:** Light yellow solid, m.p. 143.5-143.9 °C; yield 64%, >20:1 dr;  $^1\text{H}$  NMR (DMSO- $d_6$ , 400 MHz)  $\delta$ : 2.04-2.07 (m, 1H), 2.17-2.23 (m, 1H), 2.35-2.44 (m, 2H), 3.66-3.70 (m, 1H), 3.96-4.03 (m, 1H), 4.31-4.34 (m, 1H), 6.83 (s, 1H), 7.16-7.20 (m, 1H), 7.32-7.36 (m, 2H), 7.49 (d,  $J = 7.6$  Hz, 2H), 7.65 (d,  $J = 8.4$  Hz, 1H), 8.10-8.12 (m, 1H), 8.71 (d,  $J = 2.4$  Hz, 1H);  $^{13}\text{C}$  NMR (DMSO- $d_6$ , 100 MHz)  $\delta$ : 23.0, 24.9, 71.7, 77.5, 86.5, 121.5, 122.4, 126.5, 129.4, 129.5, 136.5, 139.4, 150.3, 151.4, 169.8; HRMS (ESI-TOF)  $m/z$ : Calcd. for  $\text{C}_{17}\text{H}_{16}\text{BrN}_3\text{NaO}_2$   $[\text{M}+\text{Na}]^+$ : 396.0318; Found: 396.0322.

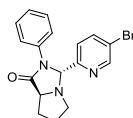

**3d:** Light yellow solid, m.p. 182.0-182.8 °C; yield 88%, >20:1 dr;  $^1\text{H}$  NMR (DMSO- $d_6$ , 400 MHz)  $\delta$ : 2.09-2.12 (m, 1H), 2.22-2.28 (m, 1H), 2.39-2.50 (m, 2H), 3.71-3.75 (m, 1H), 4.01-4.08 (m, 1H), 4.36-4.39 (m, 1H), 6.87 (s, 1H), 7.21-7.25 (m, 1H), 7.37-7.41 (m, 2H), 7.53-7.56 (m, 2H), 7.70 (d,  $J = 8.0$  Hz, 1H), 8.15-8.17 (m, 1H), 8.76 (d,  $J = 2.4$  Hz, 1H);  $^{13}\text{C}$  NMR (DMSO- $d_6$ , 100 MHz)  $\delta$ : 24.9, 27.9, 56.0, 64.6, 82.5, 120.0, 121.2, 124.1, 125.1, 129.2, 137.9, 140.3, 150.5, 157.7, 175.1; HRMS (ESI-TOF)  $m/z$ : Calcd. for  $\text{C}_{17}\text{H}_{16}\text{BrN}_3\text{NaO}$   $[\text{M}+\text{Na}]^+$ : 380.0369; Found: 380.0375.

## 6. General procedure for preparation of chiral ligand L4a

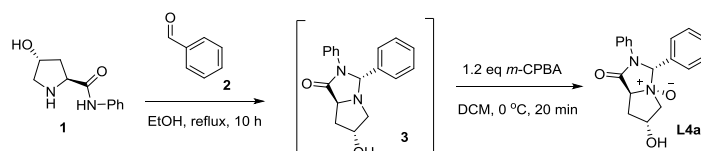

In a sealed tube equipped with a magnetic stirring bar, benzaldehyde **2** (1.0 mmol) and optically pure 4-hydroxyprolinamide **1** (1.2 mmol, 1.2 equiv) were added. Then, anhydrous ethanol (6.0 mL) was added and the reaction was heated with stirring at reflux for 12 h. After completion of the reaction, as indicated by TLC, the aftertreatment residue was purified by flash column chromatography to give the intermediate **3**.

For the oxidation step, see: X. Liu, L. Lin and X. Feng, Chiral *N,N'*-dioxide ligands: synthesis, coordination chemistry and asymmetric catalysis, *Org. Chem. Front.*, 2014, **1**, 298-302. In a sealed tube equipped with a magnetic stirring bar, to the intermediate **3** was added 3.0 mL of DCM and *m*-CPBA (1.2 eq). The reaction mixture was stirred at 0 °C for 20 min. After completion of the reaction, as indicated by TLC, the aftertreatment residue was purified by flash column chromatography to furnish the ligand **L4a**.

## 7. Characterization data of chiral ligand **L4a**

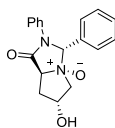

**L4a**: white solid; yield 75%, >20:1 dr; <sup>1</sup>H NMR (DMSO-*d*<sub>6</sub>, 400 MHz) δ: 2.45-2.57 (m, 2H), 3.69 (d, *J* = 11.6 Hz, 1H), 4.07-4.11 (m, 1H), 4.48 (s, 1H), 4.77-4.80 (m, 1H), 6.80 (s, 1H), 7.16-7.19 (m, 1H), 7.32-7.38 (m, 5H), 7.50-7.53 (m, 4H); <sup>13</sup>C NMR (DMSO-*d*<sub>6</sub>, 100 MHz) δ: 36.7, 70.8, 75.4, 76.5, 87.7, 123.1, 126.7, 128.5, 129.5, 130.3, 130.4, 131.7, 136.2, 168.1; HRMS (ESI-TOF) *m/z*: Calcd. for C<sub>18</sub>H<sub>18</sub>N<sub>2</sub>NaO<sub>3</sub> [M+Na]<sup>+</sup>: 333.1210; Found: 333.1206.

## 8. General procedure for preparation of chiral ligand **L6a**

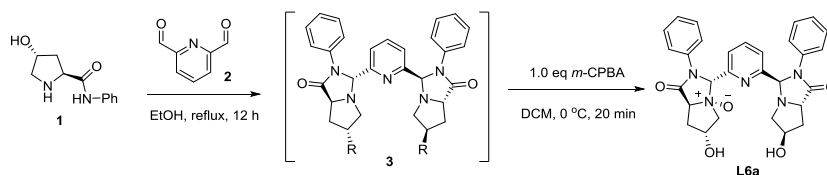

In a sealed tube equipped with a magnetic stirring bar, pyridine-2,6-dicarbaldehyde **2** (1.0 mmol) and optically pure 4-hydroxyprolinamide or prolinamide **1** (2.4 mmol, 2.4 equiv) were added. Then, anhydrous ethanol (6.0 mL) was added and the reaction was heated with stirring at reflux for 12 h. After completion of the reaction, as indicated by TLC, the aftertreatment residue was



purified by flash column chromatography to give the intermediate **3**.

For the oxidation step, see: X. Liu, L. Lin and X. Feng, Chiral *N,N'*-dioxide ligands: synthesis, coordination chemistry and asymmetric catalysis, *Org. Chem. Front.*, 2014, **1**, 298-302. In a sealed tube equipped with a magnetic stirring bar, to the intermediate **3** was added 3.0 mL of DCM and *m*-CPBA (1.0 eq). The reaction mixture was stirred at 0 °C for 20 min. After completion of the reaction, as indicated by TLC, the aftertreatment residue was purified by flash column chromatography to furnish the chiral ligand **L6a**.

### 9. Characterization data of chiral ligand **L6a**

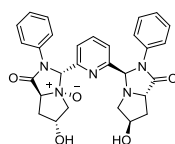

**L6a**: White solid, m.p. 222.1-223.4 °C; yield 41%, >20:1 dr; <sup>1</sup>H NMR (DMSO-*d*<sub>6</sub>, 400 MHz) δ: 1.84-1.90 (m, 1H), 2.15-2.26 (m, 2H), 2.41-2.44 (m, 1H), 2.95-2.98 (m, 1H), 3.21 (d, *J* = 10.0 Hz, 1H), 3.64 (d, *J* = 11.2 Hz, 1H), 3.77-3.80 (m, 1H), 3.98-4.06 (m, 2H), 4.25 (s, 1H), 4.38 (s, 1H), 4.92 (br s, 1H), 6.13 (s, 1H), 6.69 (br s, 1H), 6.82 (s, 1H), 7.03-7.07 (m, 1H), 7.14-7.24 (m, 3H), 7.28-7.32 (m, 2H), 7.48-7.56 (m, 6H), 7.79-7.83 (m, 1H); <sup>13</sup>C NMR (DMSO-*d*<sub>6</sub>, 100 MHz) δ: 36.5, 37.1, 63.3, 63.7, 70.0, 70.9, 74.7, 76.4, 82.4, 86.1, 121.5, 122.9, 123.8, 125.0, 126.6, 127.5, 129.1, 129.4, 136.3, 137.9, 138.1, 150.5, 158.0, 168.7, 174.9; HRMS (ESI-TOF) *m/z*: Calcd. for C<sub>29</sub>H<sub>29</sub>N<sub>5</sub>NaO<sub>5</sub> [M+Na]<sup>+</sup>: 550.2061; Found: 550.2059.

### 10. Table S1: optimization of reaction conditions for synthesis of compound **6a**<sup>a</sup>

| Entry | Metal                | Ligand     | Ligand/metal | Sovent | Yield <sup>b</sup> (%) | Ee <sup>c</sup> |
|-------|----------------------|------------|--------------|--------|------------------------|-----------------|
| 1     | Ni(OTf) <sub>2</sub> | <b>L1a</b> | 1.0          | DCM    | 88                     | 77(+)           |
| 2     | Ni(OTf) <sub>2</sub> | <b>L1a</b> | 2.0          | DCM    | 87                     | 91(+)           |
| 3     | Ni(OTf) <sub>2</sub> | <b>L1a</b> | 3.0          | DCM    | 90                     | 93(+)           |
| 4     | Ni(OTf) <sub>2</sub> | <b>L1a</b> | 2.2          | DCM    | 92                     | 94(+)           |
| 5     | Co(OTf) <sub>2</sub> | <b>L1a</b> | 2.2          | DCM    | 91                     | 88(+)           |
| 6     | Zn(OTf) <sub>2</sub> | <b>L1a</b> | 2.2          | DCM    | 90                     | 92(+)           |
| 7     | Yb(OTf) <sub>2</sub> | <b>L1a</b> | 2.2          | DCM    | 88                     | 37(-)           |

|                 |                      |            |     |                    |      |       |
|-----------------|----------------------|------------|-----|--------------------|------|-------|
| 8               | Ho(OTf) <sub>2</sub> | <b>L1a</b> | 2.2 | DCM                | 89   | 43(-) |
| 9               | Tb(OTf) <sub>2</sub> | <b>L1a</b> | 2.2 | DCM                | 90   | 37(-) |
| 10              | Ni(OTf) <sub>2</sub> | <b>L1b</b> | 2.2 | DCM                | 87   | 80(+) |
| 11              | Ni(OTf) <sub>2</sub> | <b>L1c</b> | 2.2 | DCM                | 85   | 61(+) |
| 12              | Ni(OTf) <sub>2</sub> | <b>L1d</b> | 2.2 | DCM                | 65   | 17(-) |
| 13              | Ni(OTf) <sub>2</sub> | <b>L1e</b> | 2.2 | DCM                | 85   | 72(-) |
| 14              | Ni(OTf) <sub>2</sub> | <b>L1f</b> | 2.2 | DCM                | 87   | 84(-) |
| 15              | Ni(OTf) <sub>2</sub> | <b>L1g</b> | 2.2 | DCM                | 88   | 71(-) |
| 16              | Ni(OTf) <sub>2</sub> | <b>L1h</b> | 2.2 | DCM                | 83   | 30(-) |
| 17              | Ni(OTf) <sub>2</sub> | <b>L1i</b> | 2.2 | DCM                | 88   | 71(-) |
| 18              | Ni(OTf) <sub>2</sub> | <b>L1a</b> | 2.2 | CHCl <sub>3</sub>  | 91   | 92(+) |
| 19              | Ni(OTf) <sub>2</sub> | <b>L1a</b> | 2.2 | DCE                | 91   | 91(+) |
| 20              | Ni(OTf) <sub>2</sub> | <b>L1a</b> | 2.2 | THF                | 84   | 92(+) |
| 21              | Ni(OTf) <sub>2</sub> | <b>L1a</b> | 2.2 | CH <sub>3</sub> CN | 88   | 92(+) |
| 22              | Ni(OTf) <sub>2</sub> | <b>L1a</b> | 2.2 | CH <sub>3</sub> OH | <10% | -     |
| 23              | Ni(OTf) <sub>2</sub> | <b>L1a</b> | 2.2 | AcOEt              | <10% | -     |
| 24 <sup>d</sup> | Ni(OTf) <sub>2</sub> | <b>L1a</b> | 2.2 | DCM                | 81   | 90(+) |
| 25 <sup>e</sup> | Ni(OTf) <sub>2</sub> | <b>L1a</b> | 2.2 | DCM                | 85   | 89(+) |

<sup>a</sup> Reaction conditions: metal (1.0 mol %), ligand (x mol %), **4a** (0.30 mmol), and **5a** (0.20 mmol) in 3.0 mL of CH<sub>2</sub>Cl<sub>2</sub> at 25 °C.

<sup>b</sup> Isolated yield after flash chromatography.

<sup>c</sup> Determined by HPLC analysis.

<sup>d</sup> Run at -5 °C.

<sup>e</sup> Ni(OTf)<sub>2</sub> (0.5 mol %), **L1a** (1.1 mol %).

## 11. Catalytic asymmetric synthesis of compounds **6**

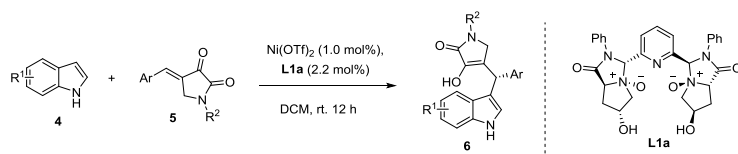

In a sealed tube equipped with a magnetic stirring bar, to the mixture of Ni(OTf)<sub>2</sub> (1.0 mol %), **L1a** (2.2 mol %) in 3.0 mL of CH<sub>2</sub>Cl<sub>2</sub> was added **4** (0.30 mmol), and **5** (0.20 mmol). The reaction mixture was stirred at room temperature for 12 h and was directly loaded onto a silica gel and purified by flash chromatography to give the desired product **6**, using hexane/EtOAc (10/1, v/v) as the eluent.

## 12. Characterization data of compounds **6**

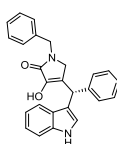

**6a:** Light yellow solid, m.p. 193.2-195.4 °C; yield 89%, 94% ee,  $[\alpha]_D^{20} = -18.7$  (*c* 1.2, CHCl<sub>3</sub>); The ee was determined by HPLC analysis using a Chiralpak IA column (60/40 hexane/*i*-PrOH; flow rate: 1.0 mL/min;  $\lambda = 254$  nm;  $\tau_{major} = 19.86$  min;  $\tau_{minor} = 10.81$  min); <sup>1</sup>H NMR (DMSO-*d*<sub>6</sub>, 400 MHz)  $\delta$ : 3.54-3.67 (m, 2H), 4.51 (s, 2H), 5.58 (s, 1H), 6.86-6.90 (m, 1H), 6.96 (s, 1H), 7.02-7.06 (m, 1H), 7.11-7.35 (m, 12H), 9.52 (br s, 1H), 10.92 (br s, 1H); <sup>13</sup>C NMR (DMSO-*d*<sub>6</sub>, 100 MHz)  $\delta$ : 39.0, 45.9, 48.1, 112.0, 115.6, 118.9, 119.1, 121.6, 123.4, 123.8, 126.8, 126.9, 127.7, 128.5, 128.8, 129.1, 136.9, 138.2, 142.5, 142.8, 167.3; HRMS (ESI-TOF) *m/z*: Calcd. for C<sub>26</sub>H<sub>22</sub>N<sub>2</sub>NaO<sub>2</sub> [M+Na]<sup>+</sup>: 417.1573; Found: 417.1568.

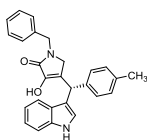

**6b:** Light yellow solid, m.p. 221.1-222.5 °C; yield 85%, 91% ee,  $[\alpha]_D^{20} = -4.1$  (*c* 0.41, CHCl<sub>3</sub>); The ee was determined by HPLC analysis using a Chiralpak IA column (60/40 hexane/*i*-PrOH; flow rate: 1.0 mL/min;  $\lambda = 254$  nm;  $\tau_{major} = 17.46$  min;  $\tau_{minor} = 9.40$  min); <sup>1</sup>H NMR (DMSO-*d*<sub>6</sub>, 400 MHz)  $\delta$ : 2.24 (s, 3H), 3.52-3.66 (m, 2H), 4.51 (s, 2H), 5.54 (d, *J* = 2.8 Hz, 1H), 6.85-6.89 (m, 1H), 6.94 (s, 1H), 7.02 (d, *J* = 7.6 Hz, 1H), 7.07 (d, *J* = 8.0 Hz, 2H), 7.11-7.15 (m, 4H), 7.22-7.35 (m, 5H), 9.49 (br s, 1H), 10.91 (br s, 1H); <sup>13</sup>C NMR (DMSO-*d*<sub>6</sub>, 100 MHz)  $\delta$ : 21.1, 38.6, 45.9, 48.1, 112.0, 115.7, 118.9, 119.1, 121.5, 123.7, 123.8, 126.9, 127.7, 127.8, 128.4, 128.8, 129.1, 129.4, 135.7, 137.0, 138.2, 139.8, 142.4, 167.4; HRMS (ESI-TOF) *m/z*: Calcd. for C<sub>27</sub>H<sub>24</sub>N<sub>2</sub>NaO<sub>2</sub> [M+Na]<sup>+</sup>: 431.1730; Found: 431.1733.

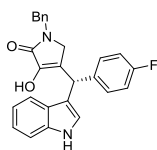

**6c:** Light yellow solid, m.p. 167.4-168.8 °C; yield 90%, 91% ee; The ee was determined by HPLC analysis using a Chiralpak IA column (60/40 hexane/*i*-PrOH; flow rate: 1.0 mL/min;  $\lambda = 254$  nm;  $\tau_{major} = 17.51$  min;  $\tau_{minor} = 9.30$  min); <sup>1</sup>H NMR (CDCl<sub>3</sub>, 400 MHz)  $\delta$ : 3.45-3.55 (m, 2H), 4.40-4.51 (m, 2H), 5.50 (s, 1H), 6.87 (d, *J* = 1.6 Hz, 1H), 6.82-6.92 (m, 3H), 7.03-7.24 (m, 11H), 8.14 (br s, 1H); <sup>13</sup>C NMR (CDCl<sub>3</sub>, 100 MHz)  $\delta$ : 38.7, 46.8, 48.7, 111.3, 115.3 (d, *J*<sub>CF</sub> = 21.2 Hz), 116.2, 119.5 (d, *J*<sub>CF</sub> = 23.1 Hz), 122.3, 123.0, 126.5, 127.7, 128.8, 129.7 (d, *J*<sub>CF</sub> = 8.1 Hz), 136.6

(d,  $J_{CF} = 9.0$  Hz), 141.8, 161.6 (d,  $J_{CF} = 242.3$  Hz), 167.8; HRMS (ESI-TOF)  $m/z$ : Calcd. for  $C_{26}H_{21}FN_2NaO_2 [M+Na]^+$ : 435.1479; Found: 435.1479.

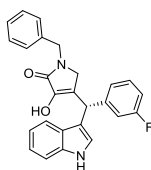

**6d**: Light yellow solid, m.p. 115.4-115.9 °C; yield 90%, 94% ee; The ee was determined by HPLC analysis using a Chiralpak IA column (60/40 hexane/*i*-PrOH; flow rate: 1.0 mL/min;  $\lambda = 254$  nm;  $\tau_{major} = 9.09$  min;  $\tau_{minor} = 15.45$  min);  $^1H$  NMR (DMSO- $d_6$ , 400 MHz)  $\delta$ : 3.58-3.69 (m, 2H), 4.47-4.57 (m, 2H), 5.59 (s, 1H), 6.88-6.92 (m, 1H), 7.01-7.05 (m, 4H), 7.10-7.14 (m, 3H), 7.17 (d,  $J = 8.0$  Hz, 1H), 7.24 (d,  $J = 7.2$  Hz, 1H), 7.28-7.36 (m, 4H), 9.58 (br s, 1H), 10.98 (br s, 1H);  $^{13}C$  NMR (DMSO- $d_6$ , 100 MHz)  $\delta$ : 38.8, 46.0, 48.2, 112.1, 113.6 (d,  $J_{CF} = 21.0$  Hz), 114.9, 115.1 (d,  $J_{CF} = 22.2$  Hz), 119.0 (d,  $J_{CF} = 8.1$  Hz), 121.7, 122.6, 124.0, 124.6, 126.7, 127.7, 129.1, 130.6 (d,  $J_{CF} = 7.2$  Hz), 136.9, 138.1, 142.8, 145.8 (d,  $J_{CF} = 7.2$  Hz), 162.8 (d,  $J_{CF} = 241.2$  Hz), 167.3; HRMS (ESI-TOF)  $m/z$ : Calcd. for  $C_{26}H_{21}FN_2NaO_2 [M+Na]^+$ : 435.1479; Found: 435.1484.

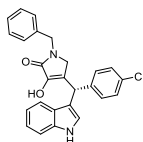

**6e**: Light yellow solid, m.p. 240.2-241.3 °C; yield 91%, 93% ee,  $[\alpha]_D^{20} = -60.7$  ( $c$  1.2,  $CHCl_3$ ); The ee was determined by HPLC analysis using a Chiralpak IA column (60/40 hexane/*i*-PrOH; flow rate: 1.0 mL/min;  $\lambda = 254$  nm;  $\tau_{major} = 17.35$  min;  $\tau_{minor} = 9.40$  min);  $^1H$  NMR (DMSO- $d_6$ , 400 MHz)  $\delta$ : 3.55-3.67 (m, 2H), 4.46-4.57 (m, 2H), 5.57 (s, 1H), 6.87-6.91 (m, 1H), 6.99 (s, 1H), 7.03-7.07 (m, 1H), 7.12-7.16 (m, 2H), 7.23-7.36 (m, 9H), 9.56 (br s, 1H), 10.96 (br s, 1H);  $^{13}C$  NMR (DMSO- $d_6$ , 100 MHz)  $\delta$ : 38.5, 46.0, 48.2, 112.1, 115.1, 119.0, 121.7, 122.7, 124.0, 126.7, 127.7, 128.7, 129.1, 130.3, 131.3, 137.0, 138.1, 141.9, 142.7, 167.3; HRMS (ESI-TOF)  $m/z$ : Calcd. for  $C_{26}H_{21}ClN_2NaO_2 [M+Na]^+$ : 451.1184; Found: 451.1185.

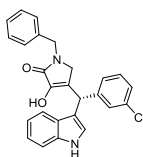

**6f**: Light yellow solid, m.p. 238.2-239.9 °C; yield 90%, 97% ee; The ee was determined by HPLC analysis using a Chiralpak IA column (60/40 hexane/*i*-PrOH; flow rate: 1.0 mL/min;  $\lambda$  = 254 nm;  $\tau_{major}$  = 8.57 min;  $\tau_{minor}$  = 6.43 min);  $^1\text{H}$  NMR (DMSO- $d_6$ , 400 MHz)  $\delta$ : 3.43-3.47 (m, 1H), 3.68-3.73 (m, 1H), 4.48-4.58 (m, 2H), 5.88 (d,  $J$  = 8.8 Hz, 1H), 6.87-6.96 (m, 2H), 7.04-7.25 (m, 8H), 7.29-7.32 (m, 2H), 7.35-7.39 (m, 1H), 7.43-7.46 (m, 1H), 9.53-9.56 (m, 1H), 10.98 (br s, 1H);  $^{13}\text{C}$  NMR (DMSO- $d_6$ , 100 MHz)  $\delta$ : 36.3, 46.0, 48.6, 112.1, 114.6, 118.8, 119.1, 121.3, 121.7, 124.2, 126.7, 127.5, 127.7, 128.6, 129.1, 129.8, 130.3, 133.3, 137.0, 138.1, 140.1, 143.2, 167.4; HRMS (ESI-TOF)  $m/z$ : Calcd. for  $\text{C}_{26}\text{H}_{21}\text{ClN}_2\text{NaO}_2$  [ $\text{M}+\text{Na}$ ] $^+$ : 451.1184; Found: 451.1185.

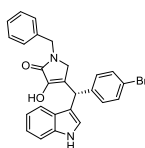

**6g**: Light yellow solid, m.p. 222.1-223.4 °C; yield 91%, 91% ee,  $[\alpha]_{\text{D}}^{20}$  = -39.1 ( $c$  0.9,  $\text{CHCl}_3$ ); The ee was determined by HPLC analysis using a Chiralpak IA column (60/40 hexane/*i*-PrOH; flow rate: 1.0 mL/min;  $\lambda$  = 254 nm;  $\tau_{major}$  = 16.95 min;  $\tau_{minor}$  = 9.67 min);  $^1\text{H}$  NMR (DMSO- $d_6$ , 400 MHz)  $\delta$ : 3.55-3.66 (m, 2H), 4.46-4.56 (m, 2H), 5.54 (s, 1H), 6.87-6.91 (m, 1H), 6.98 (d,  $J$  = 2.4 Hz, 1H), 7.02-7.06 (m, 1H), 7.12-7.16 (m, 3H), 7.19-7.25 (m, 3H), 7.28-7.30 (m, 2H), 7.32-7.35 (m, 1H), 7.38 (d,  $J$  = 4.4 Hz, 1H), 7.45 (d,  $J$  = 12.0 Hz, 1H), 9.56 (br s, 1H), 10.96 (br s, 1H);  $^{13}\text{C}$  NMR (DMSO- $d_6$ , 100 MHz)  $\delta$ : 38.5, 46.0, 48.2, 112.1, 115.0, 119.0, 119.1, 120.0, 121.7, 122.7, 124.0, 126.7, 127.7, 128.4, 129.1, 129.2, 130.7, 131.6, 136.9, 138.1, 142.3, 142.7, 167.3; HRMS (ESI-TOF)  $m/z$ : Calcd. for  $\text{C}_{26}\text{H}_{21}\text{BrN}_2\text{NaO}_2$  [ $\text{M}+\text{Na}$ ] $^+$ : 495.0679; Found: 495.0682.

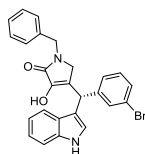

**6h**: Light yellow solid, m.p. 113.6-114.8 °C; yield 90%, 94% ee; The ee was determined by HPLC analysis using a Chiralpak IA column (60/40 hexane/*i*-PrOH; flow rate: 1.0 mL/min;  $\lambda$  = 254 nm;  $\tau_{major}$  = 17.37 min;  $\tau_{minor}$  = 9.13 min);  $^1\text{H}$  NMR (DMSO- $d_6$ , 400 MHz)  $\delta$ : 3.57-3.68 (m, 2H), 4.48-4.56 (m, 2H), 5.57 (s, 1H), 6.88-6.92 (m, 1H), 7.01 (s, 1H), 7.04-7.07 (m, 1H), 7.12-7.41 (m, 11H), 9.58 (br s, 1H), 10.98 (br s, 1H);  $^{13}\text{C}$  NMR (DMSO- $d_6$ , 100 MHz)  $\delta$ : 38.7, 45.9, 48.2, 112.1, 114.8, 118.9, 119.1, 121.7, 122.1, 122.5, 124.1, 126.7, 127.6, 127.7, 129.1,

129.7, 131.0, 131.1, 136.9, 138.1, 142.9, 145.7, 167.2; HRMS (ESI-TOF)  $m/z$ : Calcd. for  $C_{26}H_{21}BrN_2NaO_2$   $[M+Na]^+$ : 495.0679; Found: 495.0678.

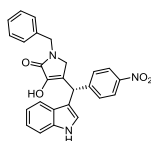

**6i**: Light yellow solid, m.p. 110.2-115.1 °C; yield 92%, 98% ee,  $[\alpha]_D^{20} = -12.0$  ( $c$  0.4,  $CHCl_3$ ); The ee was determined by HPLC analysis using a Chiralpak IA column (60/40 hexane/*i*-PrOH; flow rate: 1.0 mL/min;  $\lambda = 254$  nm;  $\tau_{major} = 16.96$  min;  $\tau_{minor} = 9.85$  min);  $^1H$  NMR ( $CDCl_3$ , 400 MHz)  $\delta$ : 3.49-3.59 (m, 2H), 4.43-4.53 (m, 2H), 5.58 (s, 1H), 6.77 (d,  $J = 1.6$  Hz, 1H), 6.91-6.95 (m, 1H), 7.05-7.08 (m, 2H), 7.10 (d,  $J = 7.6$  Hz, 2H), 7.17-7.20 (m, 4H), 7.27 (d,  $J = 8.0$  Hz, 1H), 7.32 (d,  $J = 8.8$  Hz, 2H), 8.02 (d,  $J = 8.4$  Hz, 2H), 8.17 (br s, 1H);  $^{13}C$  NMR ( $CDCl_3$ , 100 MHz)  $\delta$ : 38.3, 45.8, 47.7, 110.5, 113.8, 118.1, 118.9, 121.5, 122.2, 122.7, 125.2, 126.7, 126.8, 127.8, 128.1, 135.3, 135.6, 141.5, 145.7, 148.1, 166.6; HRMS (ESI-TOF)  $m/z$ : Calcd. for  $C_{26}H_{21}N_3NaO_4$   $[M+Na]^+$ : 462.1424; Found: 462.1424.

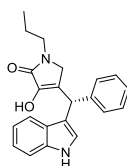

**6j**: Light yellow solid, m.p. 92.3-94.1 °C; yield 90%, 96% ee,  $[\alpha]_D^{20} = -6.0$  ( $c$  1.1,  $CHCl_3$ ); The ee was determined by HPLC analysis using a Chiralpak IA column (60/40 hexane/*i*-PrOH; flow rate: 1.0 mL/min;  $\lambda = 254$  nm;  $\tau_{major} = 18.49$  min;  $\tau_{minor} = 12.59$  min);  $^1H$  NMR ( $DMSO-d_6$ , 400 MHz)  $\delta$ : 0.74-0.78 (m, 3H), 1.40-1.46 (m, 2H), 3.22-3.25 (m, 2H), 3.60-3.74 (m, 2H), 5.58 (s, 1H), 6.87-6.91 (m, 1H), 7.03-7.07 (m, 2H), 7.17-7.23 (m, 2H), 7.28-7.30 (m, 4H), 7.36 (d,  $J = 8.0$  Hz, 1H), 9.37 (br s, 1H), 10.95 (br s, 1H);  $^{13}C$  NMR ( $DMSO-d_6$ , 100 MHz)  $\delta$ : 11.6, 21.6, 39.0, 43.9, 48.3, 112.0, 115.7, 118.9, 119.1, 121.6, 122.7, 123.9, 126.7, 126.9, 128.5, 128.8, 137.0, 142.6, 143.0, 167.1; HRMS (ESI-TOF)  $m/z$ : Calcd. for  $C_{22}H_{22}N_2NaO_2$   $[M+Na]^+$ : 369.1573; Found: 369.1570.

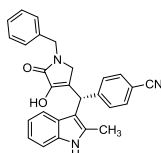

**6k**: Light yellow solid, m.p. 133.1-134.4 °C; yield 91%, 95% ee; The ee was determined by HPLC analysis using a Chiralpak ID column (80/20 hexane/*i*-PrOH; flow rate: 1.0 mL/min;  $\lambda$  = 254 nm;  $\tau_{major}$  = 17.23 min;  $\tau_{minor}$  = 20.69 min);  $^1\text{H}$  NMR ( $\text{CDCl}_3$ , 400 MHz)  $\delta$ : 2.25 (s, 3H), 3.39 (d,  $J$  = 10.4 Hz, 1H), 3.65 (d,  $J$  = 10.4 Hz, 1H), 4.32-4.36 (m, 1H), 4.52 (d,  $J$  = 15.2 Hz, 1H), 5.63 (s, 1H), 6.76-6.83 (m, 2H), 6.97-7.01 (m, 1H), 7.04 (d,  $J$  = 8.0 Hz, 2H), 7.18-7.23 (m, 7H), 7.41-7.43 (m, 2H), 8.08-8.14 (m, 1H);  $^{13}\text{C}$  NMR ( $\text{CDCl}_3$ , 100 MHz)  $\delta$ : 11.0, 36.8, 45.8, 47.6, 108.8, 109.0, 109.7, 117.8, 118.5, 120.2, 126.7, 126.8, 127.8, 131.1, 135.4, 141.6, 145.6, 166.7; HRMS (ESI-TOF)  $m/z$ : Calcd. for  $\text{C}_{28}\text{H}_{23}\text{N}_3\text{NaO}_2$   $[\text{M}+\text{Na}]^+$ : 456.1682; Found: 456.1678.

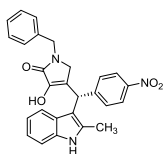

**6l**: Light yellow solid, m.p. 136.7-137.4 °C; yield 90%, 99% ee; The ee was determined by HPLC analysis using a Chiralpak ID column (85/15 hexane/*i*-PrOH; flow rate: 1.0 mL/min;  $\lambda$  = 254 nm;  $\tau_{major}$  = 23.06 min;  $\tau_{minor}$  = 28.40 min);  $^1\text{H}$  NMR ( $\text{DMSO-}d_6$ , 400 MHz)  $\delta$ : 2.29 (s, 3H), 3.44 (d,  $J$  = 16.4 Hz, 1H), 3.74 (d,  $J$  = 16.4 Hz, 1H), 4.45 (d,  $J$  = 15.2 Hz, 1H), 4.56 (d,  $J$  = 15.2 Hz, 1H), 5.70 (s, 1H), 6.76-6.80 (m, 1H), 6.90-6.97 (m, 2H), 7.13 (d,  $J$  = 7.2 Hz, 2H), 7.22-7.31 (m, 4H), 7.42 (d,  $J$  = 8.0 Hz, 1H), 8.13 (d,  $J$  = 8.8 Hz, 2H), 9.59 (br s, 1H), 11.00 (br s, 1H);  $^{13}\text{C}$  NMR ( $\text{DMSO-}d_6$ , 100 MHz)  $\delta$ : 16.8, 42.9, 50.7, 53.2, 114.4, 116.0, 123.3, 123.8, 125.4, 126.1, 128.5, 132.1, 132.4, 132.5, 133.8, 134.3, 138.5, 140.5, 142.9, 148.0, 151.1, 155.3, 171.9; HRMS (ESI-TOF)  $m/z$ : Calcd. for  $\text{C}_{27}\text{H}_{23}\text{N}_3\text{O}_4$   $[\text{M}+\text{Na}]^+$ : 453.1689; Found: 453.1694.

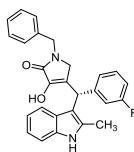

**6m**: Light yellow solid, m.p. 144.1-145.0 °C; yield 88%, 90% ee; The ee was determined by HPLC analysis using a Chiralpak IB column (90/10 hexane/*i*-PrOH; flow rate: 1.0 mL/min;  $\lambda$  = 254 nm;  $\tau_{major}$  = 16.31 min;  $\tau_{minor}$  = 13.83 min);  $^1\text{H}$  NMR ( $\text{CDCl}_3$ , 400 MHz)  $\delta$ : 2.21 (s, 3H), 3.39 (d,  $J$  = 18.4 Hz, 1H), 3.70 (d,  $J$  = 18.4 Hz, 1H), 4.31 (d,  $J$  = 15.2 Hz, 1H), 4.54 (d,  $J$  = 15.2 Hz, 1H), 5.63 (s, 1H), 6.78-6.85 (m, 4H), 6.89 (d,  $J$  = 7.6 Hz, 1H), 6.94-6.98 (m, 1H), 7.03-7.05 (m, 2H), 7.08-7.10 (m, 1H), 7.14-7.20 (m, 5H), 8.03 (br s, 1H);  $^{13}\text{C}$  NMR ( $\text{CDCl}_3$ , 100 MHz)  $\delta$ : 10.4,

35.6, 45.0, 46.9, 108.8, 108.9, 111.5 (d,  $J_{CF} = 21.2$  Hz), 113.3 (d,  $J_{CF} = 22.2$  Hz), 117.4, 117.7, 119.3, 121.3, 121.9, 125.6, 125.9, 127.1, 127.9 (d,  $J_{CF} = 8.1$  Hz), 131.3, 133.7, 134.9, 140.5, 141.9 (d,  $J_{CF} = 7.3$  Hz), 161.8 (d,  $J_{CF} = 243.4$  Hz), 166.1; HRMS (ESI-TOF)  $m/z$ : Calcd. for  $C_{27}H_{23}FN_2NaO_2 [M+Na]^+$ : 449.1636; Found: 449.1633.

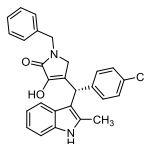

**6n**: Light yellow solid, m.p. 136.9-137.4 °C; yield 91%, 92% ee; The ee was determined by HPLC analysis using a Chiralpak ID column (85/15 hexane/*i*-PrOH; flow rate: 1.0 mL/min;  $\lambda = 254$  nm;  $\tau_{major} = 11.58$  min;  $\tau_{minor} = 13.85$  min);  $^1H$  NMR ( $CDCl_3$ , 400 MHz)  $\delta$ : 2.19 (s, 3H), 3.36 (d,  $J = 18.4$  Hz, 1H), 3.65 (d,  $J = 18.4$  Hz, 1H), 4.25 (d,  $J = 15.6$  Hz, 1H), 4.52 (d,  $J = 15.6$  Hz, 1H), 5.59 (s, 1H), 6.76-6.82 (m, 2H), 6.92-6.96 (m, 1H), 7.01 (d,  $J = 8.0$  Hz, 4H), 7.07 (d,  $J = 8.4$  Hz, 2H), 7.13-7.16 (m, 5H), 8.07 (br s, 1H);  $^{13}C$  NMR ( $CDCl_3$ , 100 MHz)  $\delta$ : 9.9, 34.8, 44.6, 46.5, 108.4, 117.0, 117.2, 118.9, 121.2, 125.1, 125.5, 125.6, 126.2, 126.6, 127.2, 129.9, 130.9, 133.2, 134.4, 137.2, 140.1, 165.7; HRMS (ESI-TOF)  $m/z$ : Calcd. for  $C_{27}H_{23}ClN_2NaO_2 [M+Na]^+$ : 465.1340; Found: 465.1343.

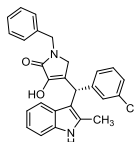

**6o**: Light yellow solid, m.p. 127.8-127.9 °C; yield 90%, 92% ee; The ee was determined by HPLC analysis using a Chiralpak IC column (80/20 hexane/*i*-PrOH; flow rate: 1.0 mL/min;  $\lambda = 254$  nm;  $\tau_{major} = 23.90$  min;  $\tau_{minor} = 10.55$  min);  $^1H$  NMR ( $CDCl_3$ , 400 MHz)  $\delta$ : 2.09 (s, 3H), 3.49 (s, 2H), 4.36 (d,  $J = 15.2$  Hz, 1H), 4.51 (d,  $J = 15.2$  Hz, 1H), 5.59 (s, 1H), 6.81-6.85 (m, 1H), 6.94-6.97 (m, 1H), 6.99-7.04 (m, 4H), 7.09-7.17 (m, 7H), 7.22-7.24 (m, 1H), 8.06 (br s, 1H);  $^{13}C$  NMR ( $CDCl_3$ , 100 MHz)  $\delta$ : 12.1, 37.2, 46.6, 49.8, 109.6, 110.6, 118.5, 119.6, 121.0, 121.4, 126.7, 127.6, 128.0, 128.8, 129.6, 129.9, 132.7, 134.1, 135.2, 136.7, 139.0, 141.9, 167.9; HRMS (ESI-TOF)  $m/z$ : Calcd. for  $C_{27}H_{23}ClN_2NaO_2 [M+Na]^+$ : 465.1340; Found: 465.1345.



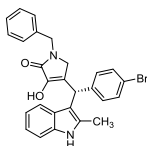

**6p:** Light yellow solid, m.p. 137.4-138.6 °C; yield 91%, 94% ee; The ee was determined by HPLC analysis using a Chiralpak ID column (90/10 hexane/*i*-PrOH; flow rate: 1.0 mL/min;  $\lambda$  = 254 nm;  $\tau_{major}$  = 20.29 min;  $\tau_{minor}$  = 25.61 min);  $^1\text{H}$  NMR ( $\text{CDCl}_3$ , 400 MHz)  $\delta$ : 2.21 (s, 3H), 3.36 (d,  $J$  = 15.2 Hz, 1H), 3.65 (d,  $J$  = 15.2 Hz, 1H), 4.28 (d,  $J$  = 15.2 Hz, 1H), 4.53 (d,  $J$  = 15.2 Hz, 1H), 5.57 (s, 1H), 6.77-6.83 (m, 2H), 6.95-6.98 (m, 3H), 7.02-7.04 (m, 2H), 7.14-7.18 (m, 5H), 7.23 (d,  $J$  = 8.4 Hz, 2H), 8.02 (br s, 1H);  $^{13}\text{C}$  NMR ( $\text{CDCl}_3$ , 100 MHz)  $\delta$ : 12.1, 37.1, 46.8, 48.6, 110.6, 119.2, 119.4, 120.2, 121.1, 123.2, 127.3, 127.7, 128.6, 128.8, 129.8, 131.3, 133.1, 135.4, 136.6, 139.9, 142.3, 167.9; HRMS (ESI-TOF)  $m/z$ : Calcd. for  $\text{C}_{27}\text{H}_{23}\text{BrN}_2\text{NaO}_2$   $[\text{M}+\text{Na}]^+$ : 509.0835; Found: 509.0831.

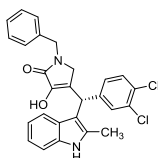

**6q:** Light yellow solid, m.p. 154.1-155.2 °C; yield 91%, 96% ee; The ee was determined by HPLC analysis using a Chiralpak IC column (90/10 hexane/*i*-PrOH; flow rate: 1.0 mL/min;  $\lambda$  = 254 nm;  $\tau_{major}$  = 11.03 min;  $\tau_{minor}$  = 12.46 min);  $^1\text{H}$  NMR ( $\text{CDCl}_3$ , 400 MHz)  $\delta$ : 2.23 (s, 3H), 3.39 (d,  $J$  = 18.4 Hz, 1H), 3.68 (d,  $J$  = 18.4 Hz, 1H), 4.34 (d,  $J$  = 15.2 Hz, 1H), 4.54 (d,  $J$  = 15.2 Hz, 1H), 5.56 (s, 1H), 6.82-6.85 (m, 2H), 6.92-6.95 (m, 1H), 6.96-7.00 (m, 1H), 7.03-7.05 (m, 2H), 7.15-7.20 (m, 7H), 7.99 (br s, 1H);  $^{13}\text{C}$  NMR ( $\text{CDCl}_3$ , 100 MHz)  $\delta$ : 12.1, 36.9, 46.8, 48.6, 110.1, 110.6, 119.0, 119.6, 121.2, 127.1, 127.6, 127.7, 128.8, 129.9, 130.2, 130.3, 132.4, 133.1, 135.4, 136.5, 141.3, 142.4, 167.7; HRMS (ESI-TOF)  $m/z$ : Calcd. for  $\text{C}_{27}\text{H}_{22}\text{Cl}_2\text{N}_2\text{NaO}_2$   $[\text{M}+\text{Na}]^+$ : 499.0951; Found: 499.0950.

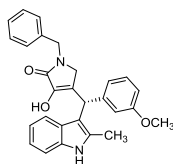

**6r:** Light yellow solid, m.p. 128.1-128.7 °C; yield 89%, 90% ee; The ee was determined by HPLC analysis using a Chiralpak ID column (90/10 hexane/*i*-PrOH; flow rate: 1.0 mL/min;  $\lambda$  =

254 nm;  $\tau_{major}$  = 38.07 min;  $\tau_{minor}$  = 47.28 min);  $^1\text{H}$  NMR ( $\text{CDCl}_3$ , 400 MHz)  $\delta$ : 2.18 (s, 3H), 3.40 (d,  $J$  = 18.4 Hz, 1H), 3.56 (s, 3H), 3.71 (d,  $J$  = 18.4 Hz, 1H), 4.27 (d,  $J$  = 15.2 Hz, 1H), 4.54 (d,  $J$  = 15.2 Hz, 1H), 5.62 (s, 1H), 6.62-6.65 (m, 1H), 6.67-6.71 (m, 2H), 6.76-6.80 (m, 1H), 6.89 (d,  $J$  = 8.0 Hz, 1H), 6.92-6.96 (m, 1H), 7.02-7.04 (m, 3H), 7.12-7.18 (m, 5H), 8.04 (br s, 1H);  $^{13}\text{C}$  NMR ( $\text{CDCl}_3$ , 100 MHz)  $\delta$ : 12.1, 37.6, 46.7, 48.8, 55.1, 110.5, 110.9, 111.6, 114.0, 119.3, 120.6, 120.9, 123.8, 127.6, 127.7, 128.8, 129.3, 133.0, 135.4, 136.8, 142.0, 142.5, 159.7, 167.9; HRMS (ESI-TOF)  $m/z$ : Calcd. for  $\text{C}_{28}\text{H}_{26}\text{N}_2\text{NaO}_3$   $[\text{M}+\text{Na}]^+$ : 461.1836; Found: 461.1839.

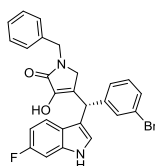

**6s**: Light yellow solid, m.p. 134.5-134.9 °C; yield 91%, 95% ee; The ee was determined by HPLC analysis using a Chiralpak IA column (60/40 hexane/*i*-PrOH; flow rate: 1.0 mL/min;  $\lambda$  = 254 nm;  $\tau_{major}$  = 13.74 min;  $\tau_{minor}$  = 7.51 min);  $^1\text{H}$  NMR ( $\text{CDCl}_3$ , 400 MHz)  $\delta$ : 3.51 (s, 2H), 4.50 (s, 2H), 5.45 (s, 1H), 6.69-6.72 (m, 2H), 6.92-6.95 (m, 1H), 7.03-7.08 (m, 5H), 7.18-7.24 (m, 4H), 7.27-7.32 (m, 2H), 8.11 (br s, 1H);  $^{13}\text{C}$  NMR ( $\text{CDCl}_3$ , 100 MHz)  $\delta$ : 38.0, 45.7, 47.5, 96.5 (d,  $J_{CF}$  = 26.2 Hz), 107.5 (d,  $J_{CF}$  = 25.3 Hz), 114.8, 119.0 (d,  $J_{CF}$  = 9.5 Hz), 120.9, 121.7, 125.9, 126.6, 126.7, 127.8, 129.0, 129.1, 130.2, 135.4, 141.1, 142.6, 158.9 (d,  $J_{CF}$  = 247.0 Hz), 166.6; HRMS (ESI-TOF)  $m/z$ : Calcd. for  $\text{C}_{26}\text{H}_{20}\text{BrFN}_2\text{NaO}_2$   $[\text{M}+\text{Na}]^+$ : 513.0584; Found: 513.0582.

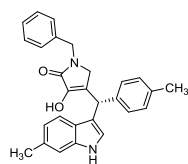

**6t**: Light yellow solid, m.p. 112.1-112.7 °C; yield 92%, 99% ee; The ee was determined by HPLC analysis using a Chiralpak IC column (60/40 hexane/*i*-PrOH; flow rate: 1.0 mL/min;  $\lambda$  = 254 nm;  $\tau_{major}$  = 6.44 min;  $\tau_{minor}$  = 7.41 min);  $^1\text{H}$  NMR ( $\text{DMSO-}d_6$ , 400 MHz)  $\delta$ : 2.26 (s, 3H), 2.36 (s, 3H), 3.53-3.66 (m, 2H), 4.52 (s, 2H), 5.53 (s, 1H), 6.72 (d,  $J$  = 8.0 Hz, 1H), 6.86 (s, 1H), 7.02 (d,  $J$  = 8.0 Hz, 1H), 7.07-7.14 (m, 7H), 7.25 (d,  $J$  = 7.2 Hz, 1H), 7.29-7.33 (m, 2H), 9.50 (br s, 1H), 10.75 (br s, 1H);  $^{13}\text{C}$  NMR ( $\text{DMSO-}d_6$ , 100 MHz)  $\delta$ : 21.0, 21.8, 38.6, 45.9, 48.1, 111.8, 115.5, 118.9, 120.7, 123.1, 123.8, 124.8, 127.6, 127.7, 128.3, 129.1, 129.3, 130.6, 135.7, 137.4, 138.2, 139.8, 142.3, 167.4; HRMS (ESI-TOF)  $m/z$ : Calcd. for  $\text{C}_{28}\text{H}_{26}\text{N}_2\text{NaO}_2$   $[\text{M}+\text{Na}]^+$ : 445.1886; Found:

445.1887.

### 13. The gram scale synthesis of the ligand L1a

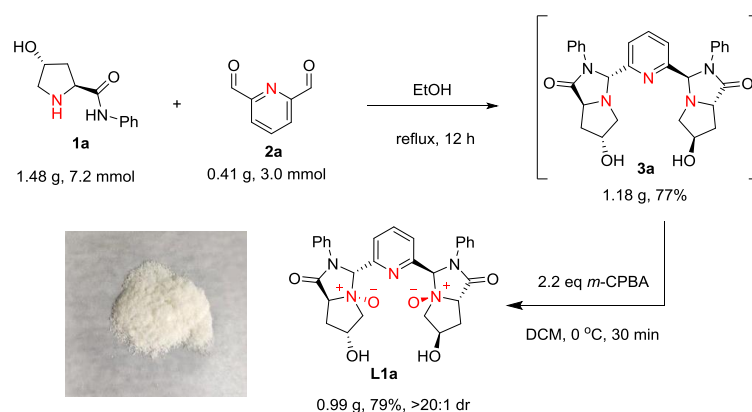

In a sealed tube equipped with a magnetic stirring bar, pyridine-2,6-dicarbaldehyde **2a** (0.41 g, 3.0 mmol) and optically pure 4-hydroxyprolinamide **1** (1.48 g, 7.2 mmol) were added. Then, anhydrous ethanol (30.0 mL) was added and the reaction was heated with stirring at reflux for 12 h. After completion of the reaction, as indicated by TLC, the aftertreatment residue was purified by flash column chromatography to give the intermediate **3a**.

For the oxidation step, see: X. Liu, L. Lin and X. Feng, Chiral *N,N'*-dioxide ligands: synthesis, coordination chemistry and asymmetric catalysis, *Org. Chem. Front.*, 2014, **1**, 298-302. In a sealed tube equipped with a magnetic stirring bar, to the intermediate **3** was added 20.0 mL of DCM and *m*-CPBA (2.2 eq). The reaction mixture was stirred at 0 °C for 30 min. After completion of the reaction, as indicated by TLC, the aftertreatment residue was purified by flash column chromatography to furnish the Py-2NO ligand **L1a** (0.99 g, 79%, >20:1 dr).

### 14. The preparative gram scale asymmetric synthesis of the product 6a

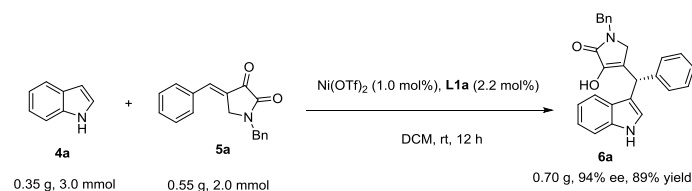

In a sealed tube equipped with a magnetic stirring bar, to the mixture of Ni(OTf)<sub>2</sub> (1.0 mol %), **L1a** (2.2 mol %) in 30 mL of CH<sub>2</sub>Cl<sub>2</sub> was added **4a** (3.0 mmol), and **5a** (2.0 mmol). The reaction mixture was stirred at room temperature for 12 h and was directly loaded onto a silica gel and purified by flash chromatography to give the desired product **6a** (0.70 g, 94% ee, 89% yield),

using hexane/EtOAc (10/1, v/v) as the eluent.

### 15. Control experiments and HPLC spectra for compound **6a**

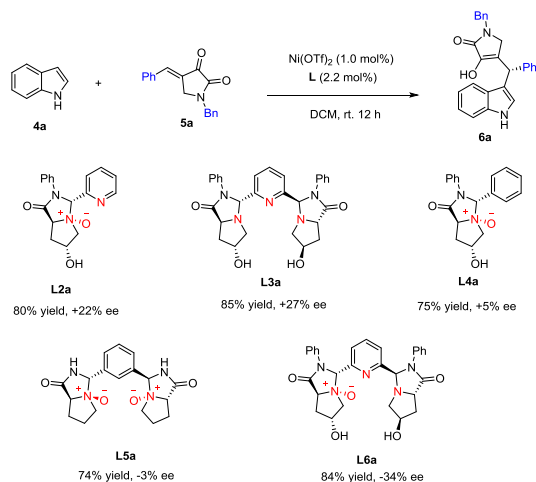

In a sealed tube equipped with a magnetic stirring bar, to the mixture of  $\text{Ni}(\text{OTf})_2$  (1.0 mol %), **L** (2.2 mol %) in 30 mL of  $\text{CH}_2\text{Cl}_2$  was added **4a** (0.3 mmol), and **5a** (0.2 mmol). The reaction mixture was stirred at room temperature for 12 h and was directly loaded onto a silica gel and purified by flash chromatography to give the desired product **6a**, using hexane/EtOAc (10/1, v/v) as the eluent.

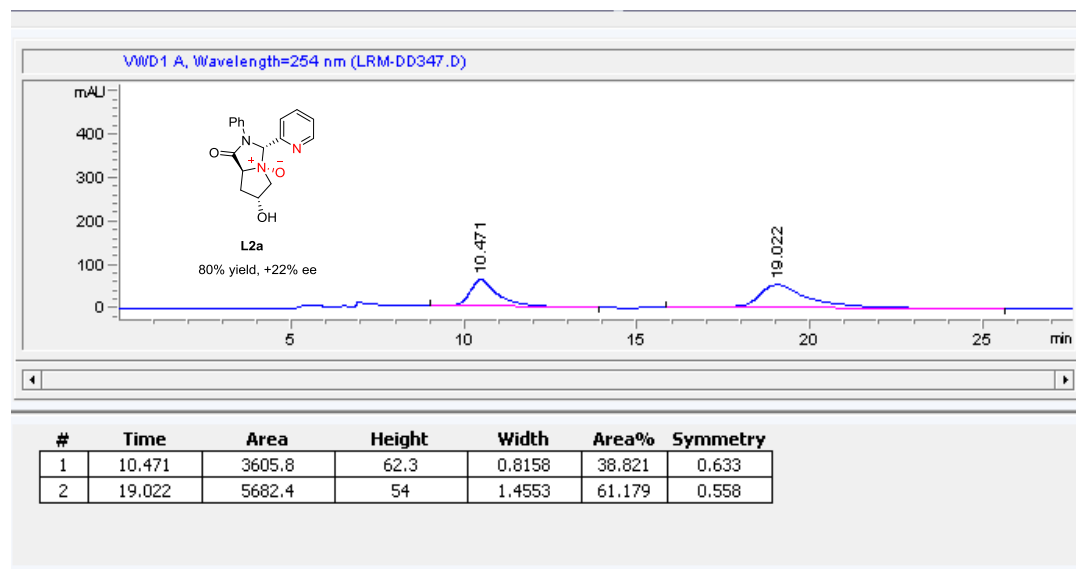

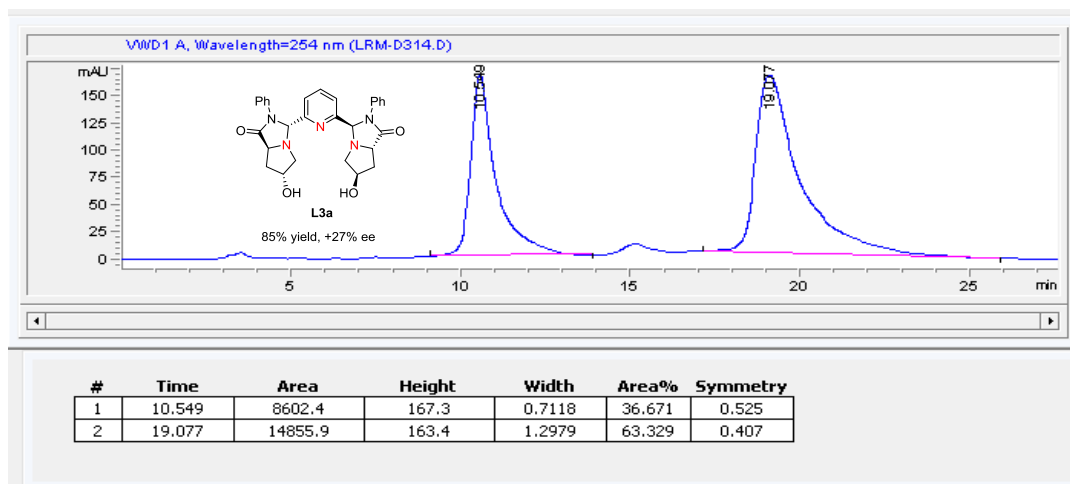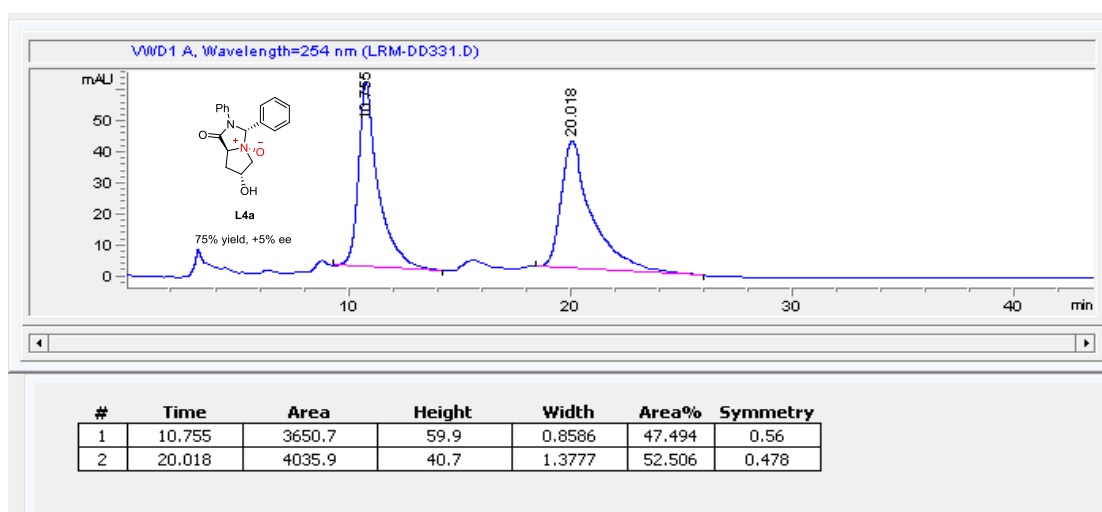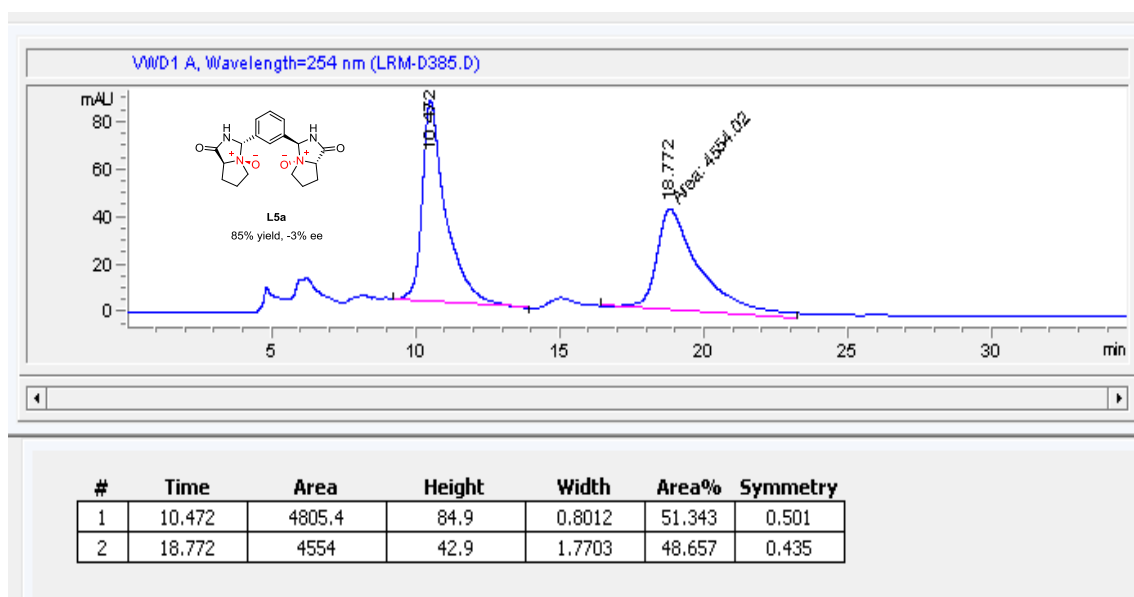

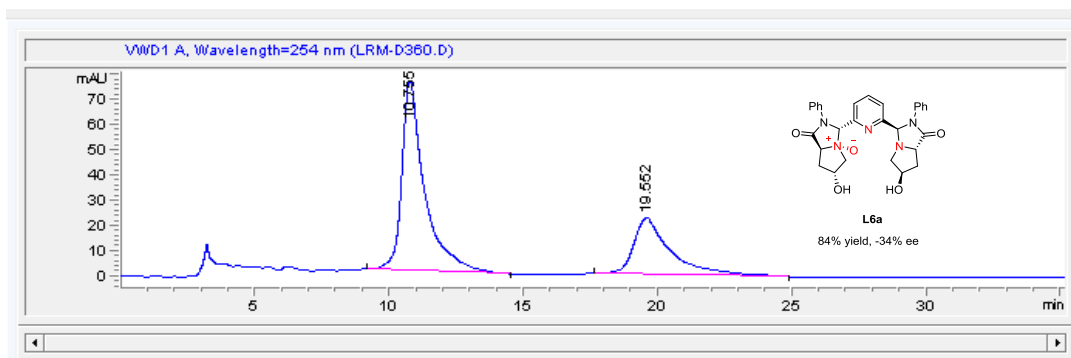

| # | Time   | Area   | Height | Width  | Area%  | Symmetry |
|---|--------|--------|--------|--------|--------|----------|
| 1 | 10.755 | 4393.1 | 75.3   | 0.8258 | 66.931 | 0.511    |
| 2 | 19.552 | 2170.5 | 22.2   | 1.3657 | 33.069 | 0.484    |

## 16. X-ray crystal data for compounds L2b, L2c and 3d

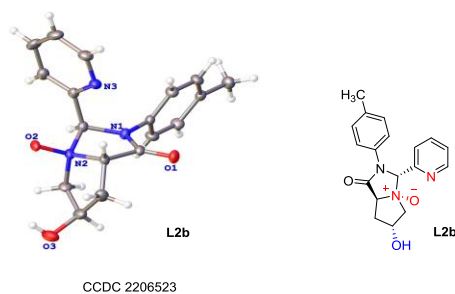

**Table S2 Crystal data and structure refinement for L2b**

|                                                      |                                                                  |
|------------------------------------------------------|------------------------------------------------------------------|
| Identification code                                  | <b>L2b</b>                                                       |
| Empirical formula                                    | $C_{18}H_{23}N_3O_5$                                             |
| Formula weight                                       | 361.39                                                           |
| Temperature/K                                        | 169.99(10)                                                       |
| Crystal system                                       | monoclinic                                                       |
| Space group                                          | $P2_1$                                                           |
| $a/\text{\AA}$ , $b/\text{\AA}$ , $c/\text{\AA}$     | 7.9392(2), 6.15070(10), 17.6593(3)                               |
| $\alpha/^\circ$ , $\beta/^\circ$ , $\gamma/^\circ$ , | 90, 93.002(2), 90                                                |
| Volume/ $\text{\AA}^3$                               | 861.15(3)                                                        |
| Z                                                    | 2                                                                |
| $\rho_{\text{calc}}/\text{cm}^3$                     | 1.323                                                            |
| $\mu/\text{mm}^{-1}$                                 | 0.853                                                            |
| F(000)                                               | 384.0                                                            |
| Radiation                                            | Cu $K\alpha$ ( $\lambda = 1.54184$ )                             |
| Crystal size/ $\text{mm}^3$                          | $0.15 \times 0.13 \times 0.1$                                    |
| $2\theta$ range for data collection/ $^\circ$        | 5.01 to 133.19                                                   |
| Index ranges                                         | $-9 \leq h \leq 9$ , $-7 \leq k \leq 7$ , $-20 \leq l \leq 20$   |
| Reflections collected                                | 6299                                                             |
| Independent reflections                              | 2954 [ $R_{\text{int}} = 0.0339$ , $R_{\text{sigma}} = 0.0366$ ] |
| Data/restraints/parameters                           | 2954/1/244                                                       |
| Goodness-of-fit on $F^2$                             | 1.127                                                            |
| Final R indexes [ $I \geq 2\sigma(I)$ ]              | $R_1 = 0.0462$ , $wR_2 = 0.1377$                                 |
| Final R indexes [all data]                           | $R_1 = 0.0467$ , $wR_2 = 0.1387$                                 |
| Largest diff. peak/hole / $e \text{\AA}^{-3}$        | 0.34/-0.32                                                       |

**Crystal Data** for  $C_{18}H_{23}N_3O_5$  ( $M = 361.39$  g/mol): monoclinic, space group  $P2_1$  (no. 4),  $a = 7.9392(2)$   $\text{\AA}$ ,  $b = 6.15070(10)$   $\text{\AA}$ ,  $c = 17.6593(3)$   $\text{\AA}$ ,  $\beta = 93.002(2)^\circ$ ,  $V = 861.15(3)$   $\text{\AA}^3$ ,  $Z = 2$ ,  $T = 169.99(10)$  K,  $\mu(\text{Cu } K\alpha) = 0.853$   $\text{mm}^{-1}$ ,  $D_{\text{calc}} = 1.394$   $\text{g}/\text{cm}^3$ , 6299 reflections measured ( $5.01^\circ \leq 2\theta \leq 133.19^\circ$ ), 2954 unique ( $R_{\text{int}} = 0.0339$ ,  $R_{\text{sigma}} = 0.0366$ ) which were used in all calculations. The final  $R_1$  was 0.0462 ( $I > 2\sigma(I)$ ) and  $wR_2$  was 0.1387 (all data).

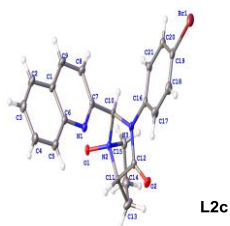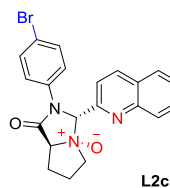

CCDC 2206524

**Table S3 Crystal data and structure refinement for L2c**

|                                                      |                                                                  |
|------------------------------------------------------|------------------------------------------------------------------|
| Identification code                                  | <b>L2c</b>                                                       |
| Empirical formula                                    | $C_{21}H_{20}BrN_3O_3$                                           |
| Formula weight                                       | 442.31                                                           |
| Temperature/K                                        | 220.00(12)                                                       |
| Crystal system                                       | monoclinic                                                       |
| Space group                                          | $P2_1$                                                           |
| $a/\text{\AA}$ , $b/\text{\AA}$ , $c/\text{\AA}$     | 10.83288(12), 7.10591(8), 12.90956(17)                           |
| $\alpha/^\circ$ , $\beta/^\circ$ , $\gamma/^\circ$ , | 90, 107.1505(13), 90                                             |
| Volume/ $\text{\AA}^3$                               | 949.56(2)                                                        |
| Z                                                    | 2                                                                |
| $\rho_{\text{calc}}/\text{cm}^3$                     | 1.547                                                            |
| $\mu/\text{mm}^{-1}$                                 | 3.187                                                            |
| F(000)                                               | 452.0                                                            |
| Radiation                                            | Cu K $\alpha$ ( $\lambda = 1.54184$ )                            |
| Crystal size/ $\text{mm}^3$                          | $0.14 \times 0.12 \times 0.11$                                   |
| $2\Theta$ range for data collection/ $^\circ$        | 7.166 to 142.432                                                 |
| Index ranges                                         | $-13 \leq h \leq 11$ , $-7 \leq k \leq 8$ , $-11 \leq l \leq 15$ |
| Reflections collected                                | 7086                                                             |
| Independent reflections                              | 3209 [ $R_{\text{int}} = 0.0173$ , $R_{\text{sigma}} = 0.0166$ ] |
| Data/restraints/parameters                           | 3209/1/257                                                       |
| Goodness-of-fit on $F^2$                             | 1.038                                                            |
| Final R indexes [ $I \geq 2\sigma(I)$ ]              | $R_1 = 0.0353$ , $wR_2 = 0.0936$                                 |
| Final R indexes [all data]                           | $R_1 = 0.0354$ , $wR_2 = 0.0937$                                 |
| Largest diff. peak/hole / $e \text{\AA}^{-3}$        | 0.46/-0.56                                                       |
| Flack parameter                                      | -0.02(2)/-0.01(3)                                                |

**Crystal Data** for  $C_{21}H_{20}BrN_3O_3$  ( $M = 442.31$  g/mol): monoclinic, space group  $P2_1$  (no. 4),  $a = 10.83288(12)$   $\text{\AA}$ ,  $b = 7.10591(8)$   $\text{\AA}$ ,  $c = 12.90956(17)$   $\text{\AA}$ ,  $\beta = 107.1505(13)^\circ$ ,  $V = 949.56(2)$   $\text{\AA}^3$ ,  $Z = 2$ ,  $T = 220.00(12)$  K,  $\mu(\text{Cu K}\alpha) = 3.187$   $\text{mm}^{-1}$ ,  $D_{\text{calc}} = 1.547$   $\text{g/cm}^3$ , 7086 reflections measured ( $7.166^\circ \leq 2\Theta \leq 142.432^\circ$ ), 3209 unique ( $R_{\text{int}} = 0.0173$ ,  $R_{\text{sigma}} = 0.0166$ ) which were used in all calculations. The final  $R_1$  was 0.0353 ( $I > 2\sigma(I)$ ) and  $wR_2$  was 0.0937 (all data).



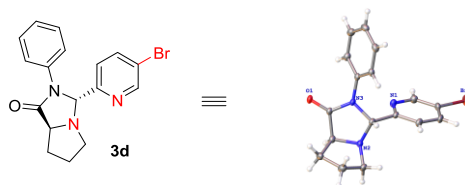

CCDC 2208260

**Table S4 Crystal data and structure refinement for 3d**

|                                                      |                                                                  |
|------------------------------------------------------|------------------------------------------------------------------|
| Identification code                                  | <b>3d</b>                                                        |
| Empirical formula                                    | $C_{17}H_{16}BrN_3O$                                             |
| Formula weight                                       | 358.24                                                           |
| Temperature/K                                        | 150.00(10)                                                       |
| Crystal system                                       | orthorhombic                                                     |
| Space group                                          | $P2_12_12_1$                                                     |
| $a/\text{\AA}$ , $b/\text{\AA}$ , $c/\text{\AA}$     | 7.79020(10), 9.7405(2), 19.9339(3)                               |
| $\alpha/^\circ$ , $\beta/^\circ$ , $\gamma/^\circ$ , | 90, 90, 90                                                       |
| Volume/ $\text{\AA}^3$                               | 1512.59(4)                                                       |
| Z                                                    | 4                                                                |
| $\rho_{\text{calc}}/\text{cm}^3$                     | 1.573                                                            |
| $\mu/\text{mm}^{-1}$                                 | 3.745                                                            |
| F(000)                                               | 728.0                                                            |
| Radiation                                            | Cu $K\alpha$ ( $\lambda = 1.54184$ )                             |
| Crystal size/ $\text{mm}^3$                          | $0.14 \times 0.12 \times 0.1$                                    |
| $2\theta$ range for data collection/ $^\circ$        | 8.872 to 147.76                                                  |
| Index ranges                                         | $-9 \leq h \leq 9$ , $-10 \leq k \leq 11$ , $-24 \leq l \leq 24$ |
| Reflections collected                                | 11359                                                            |
| Independent reflections                              | 3026 [ $R_{\text{int}} = 0.0498$ , $R_{\text{sigma}} = 0.0330$ ] |
| Data/restraints/parameters                           | 3026/0/199                                                       |
| Goodness-of-fit on $F^2$                             | 1.034                                                            |
| Final R indexes [ $I \geq 2\sigma(I)$ ]              | $R_1 = 0.0356$ , $wR_2 = 0.0899$                                 |
| Final R indexes [all data]                           | $R_1 = 0.0366$ , $wR_2 = 0.0911$                                 |
| Largest diff. peak/hole / $e \text{\AA}^{-3}$        | 0.53/-0.73                                                       |
| Flack parameter                                      | -0.032(12)/-0.021(10)                                            |

**Crystal Data** for  $C_{17}H_{16}BrN_3O$  ( $M = 358.24$  g/mol): orthorhombic, space group  $P2_12_12_1$  (no. 19),  $a = 7.79020(10)$   $\text{\AA}$ ,  $b = 9.7405(2)$   $\text{\AA}$ ,  $c = 19.9339(3)$   $\text{\AA}$ ,  $V = 1512.59(4)$   $\text{\AA}^3$ ,  $Z = 4$ ,  $T = 150.00(10)$  K,  $\mu(\text{Cu } K\alpha) = 3.745$   $\text{mm}^{-1}$ ,  $D_{\text{calc}} = 1.573$   $\text{g}/\text{cm}^3$ , 11359 reflections measured ( $8.872^\circ \leq 2\theta \leq 147.76^\circ$ ), 3026 unique ( $R_{\text{int}} = 0.0498$ ,  $R_{\text{sigma}} = 0.0330$ ) which were used in all calculations. The final  $R_1$  was 0.0356 ( $I > 2\sigma(I)$ ) and  $wR_2$  was 0.0911 (all data).

17. The copies of  $^1\text{H}$  NMR,  $^{13}\text{C}$  NMR and HPLC spectra for compounds L and 6

$^1\text{H}$  and  $^{13}\text{C}$  NMR of L1a

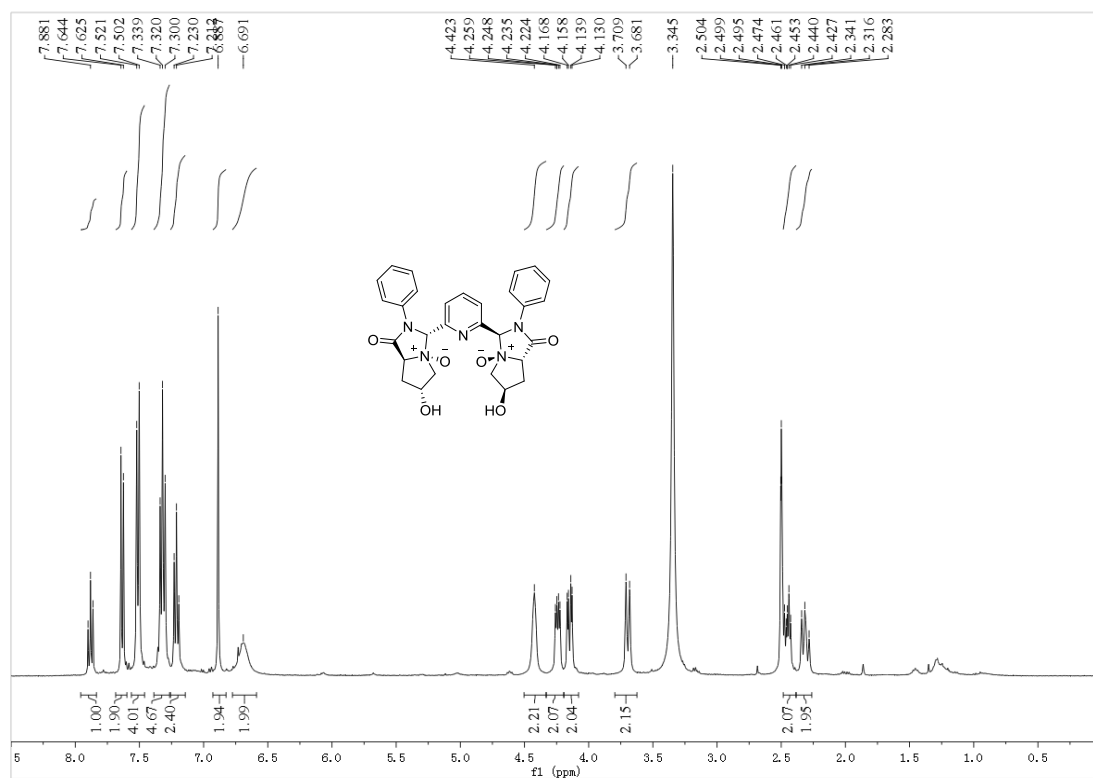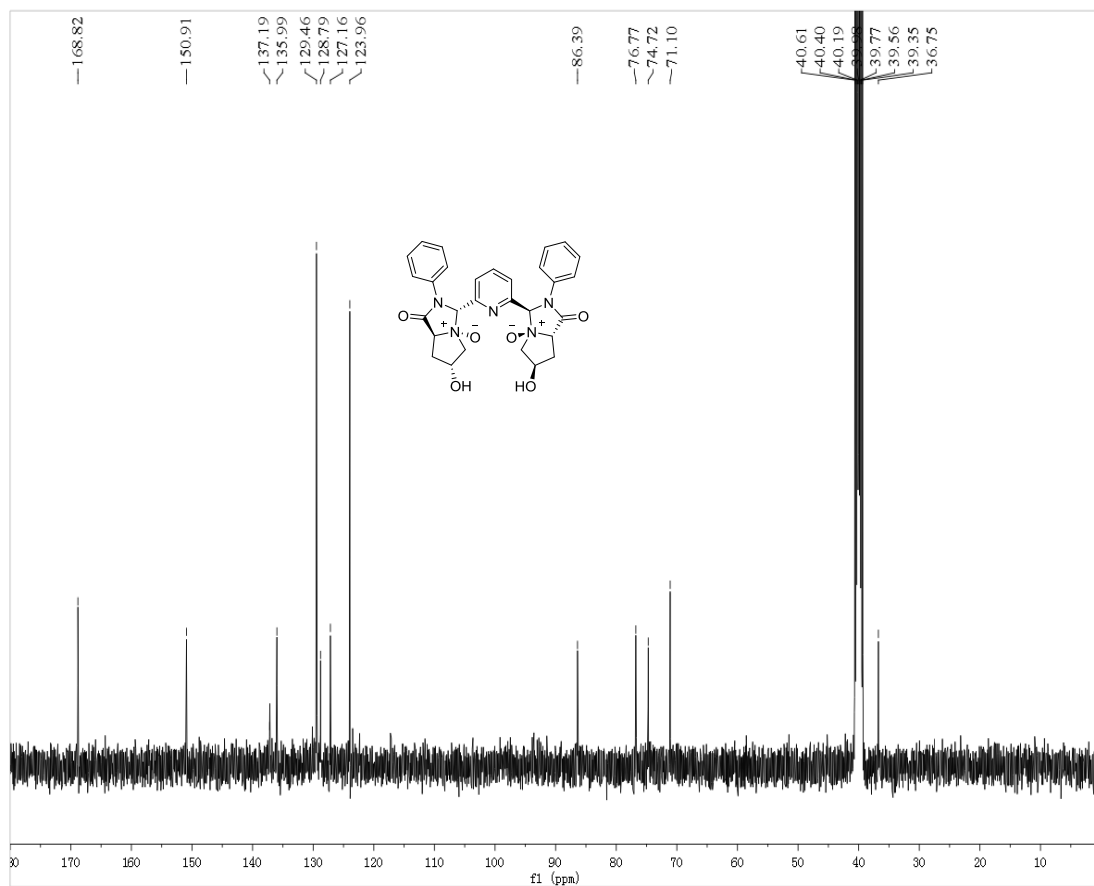

# $^1\text{H}$ and $^{13}\text{C}$ NMR of L1b

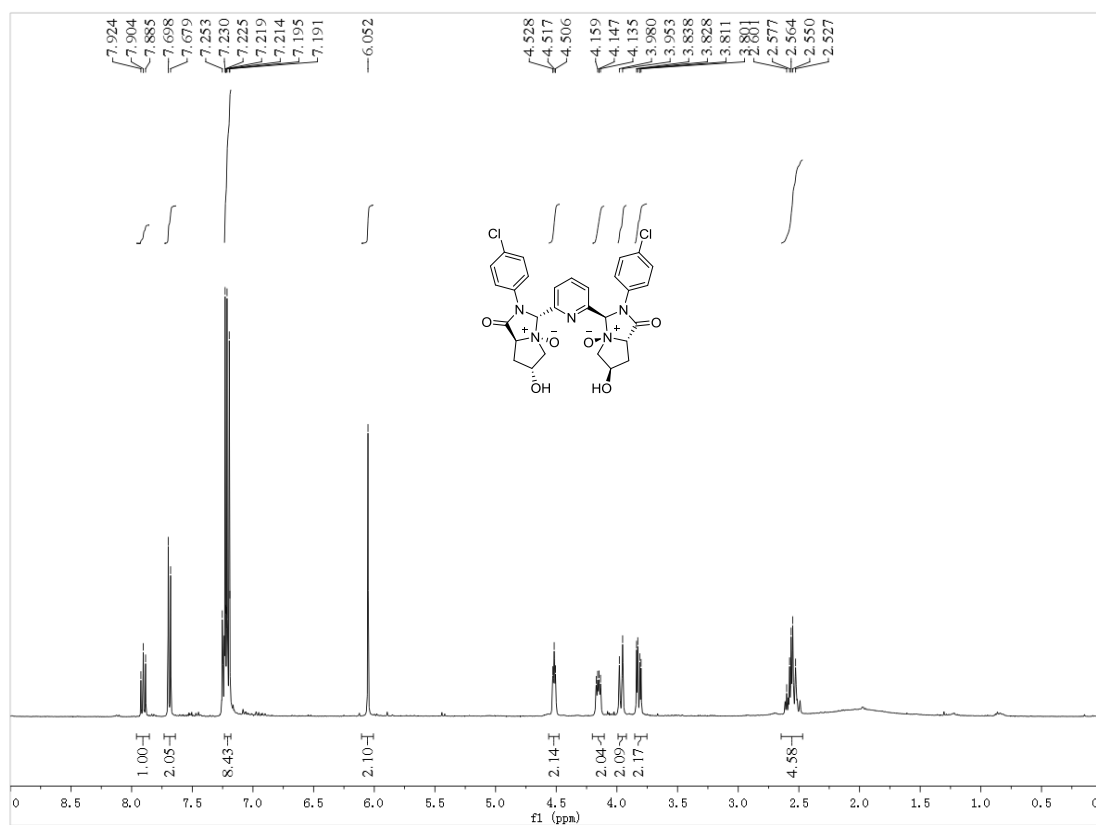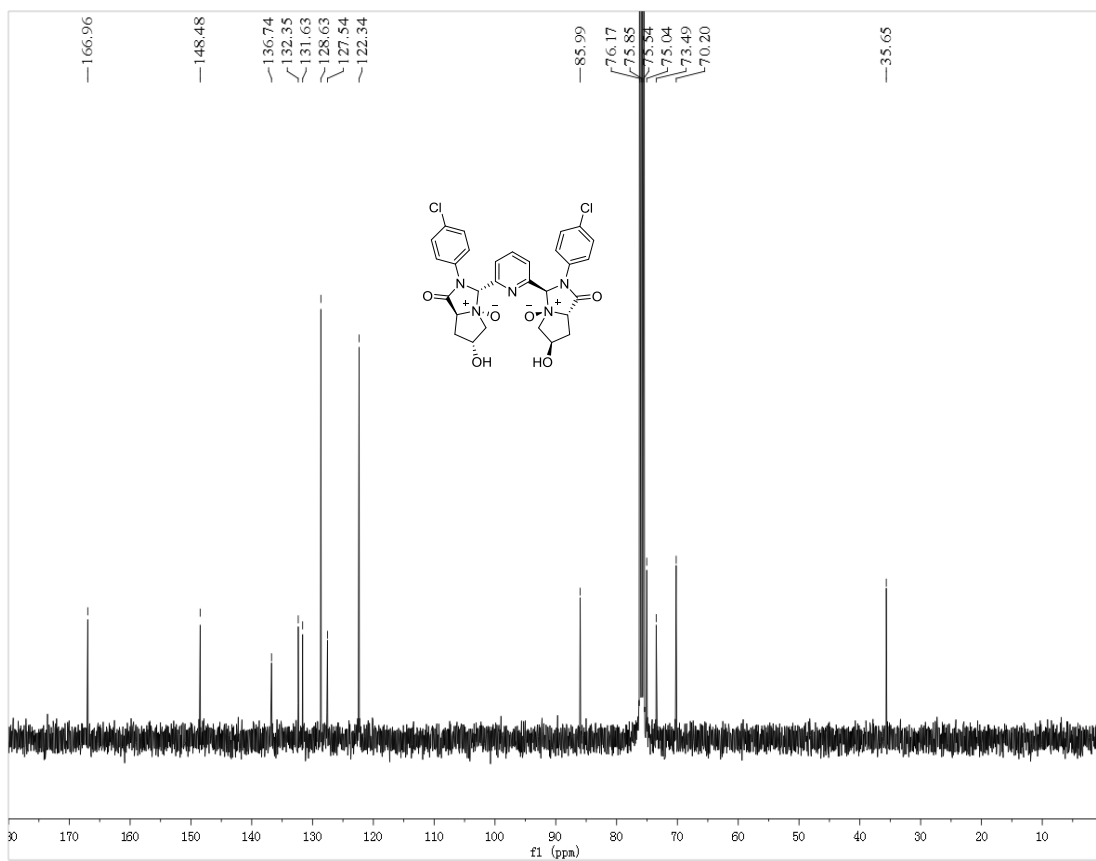

# $^1\text{H}$ and $^{13}\text{C}$ NMR of L1c

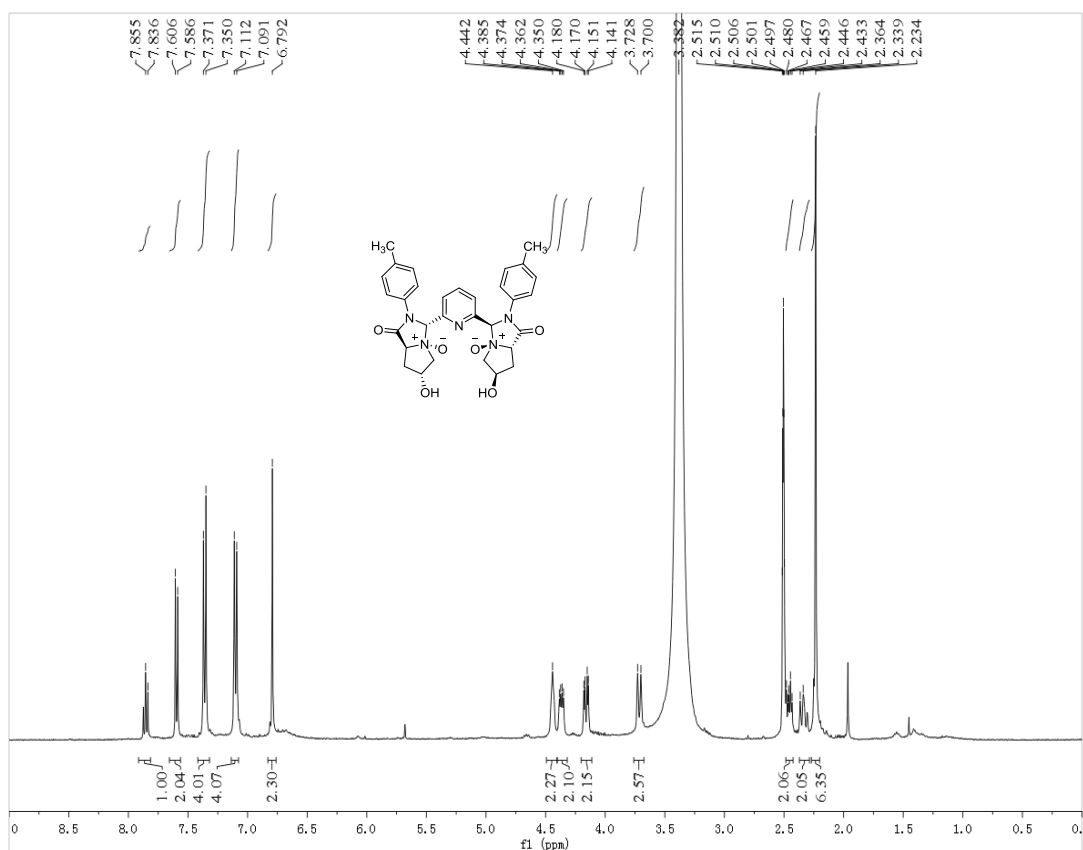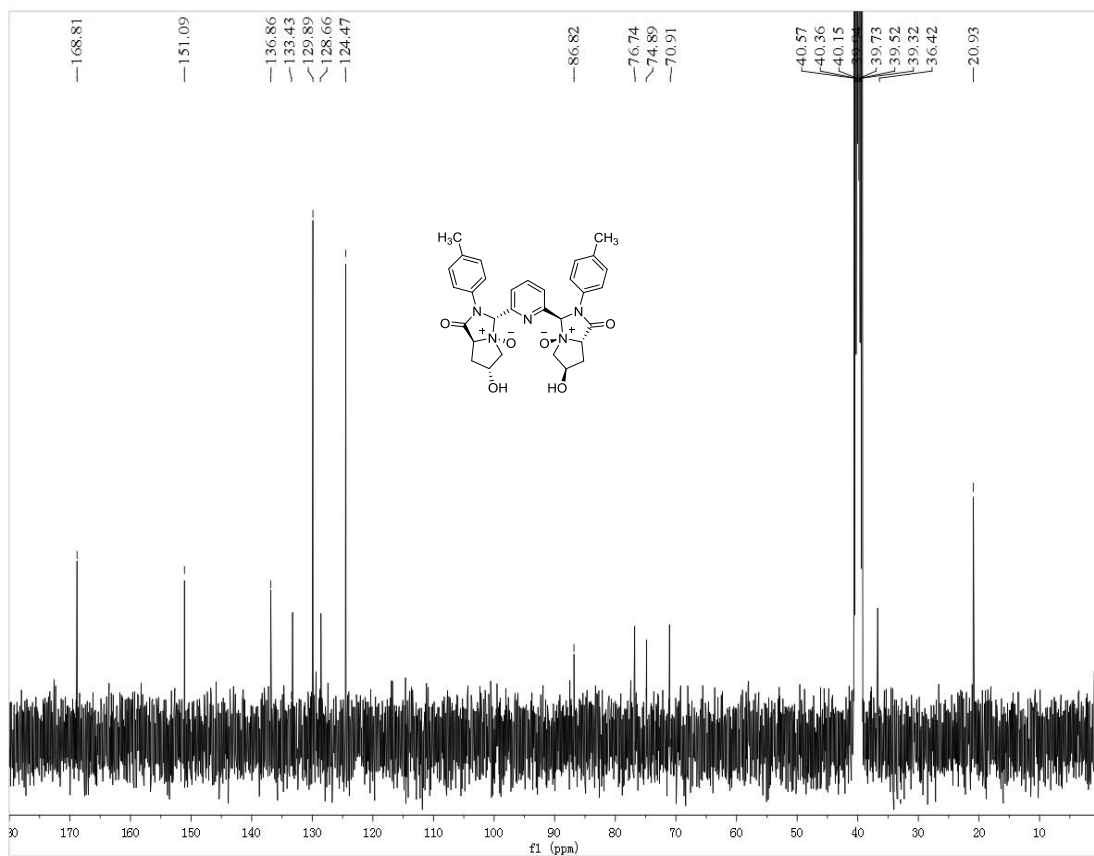

# $^1\text{H}$ and $^{13}\text{C}$ NMR of L1d

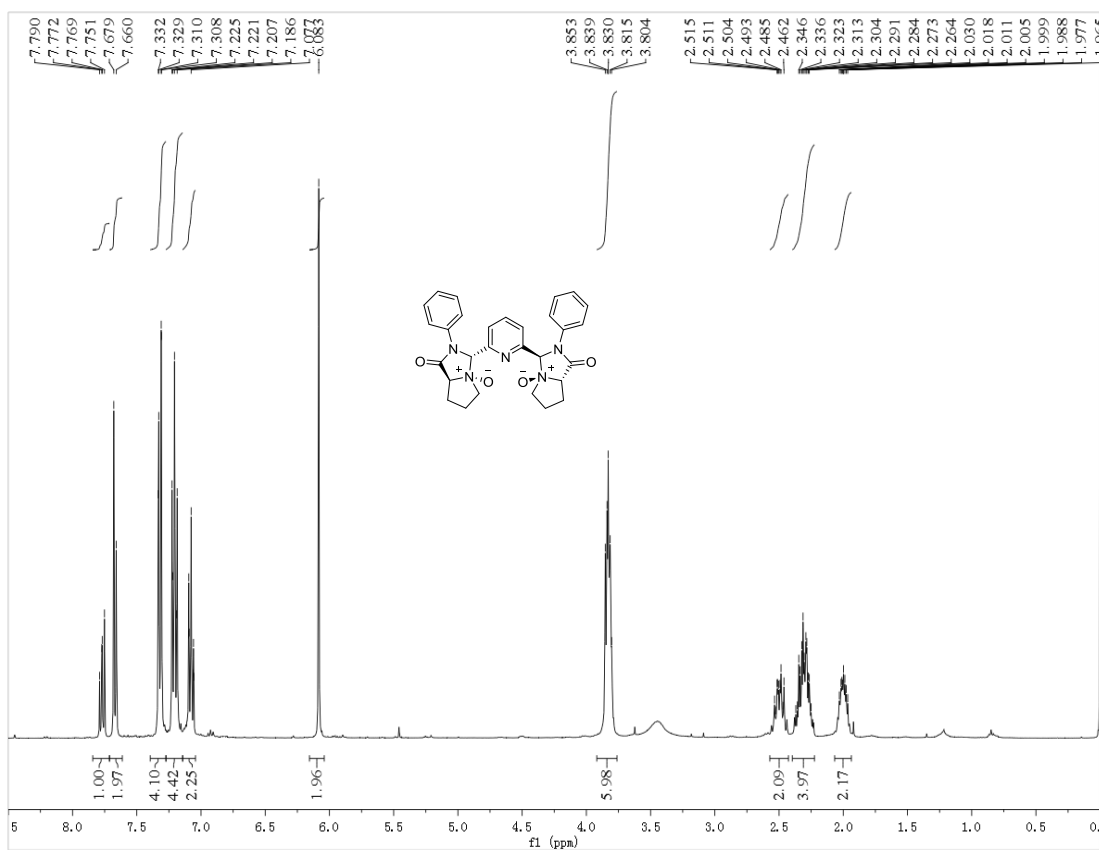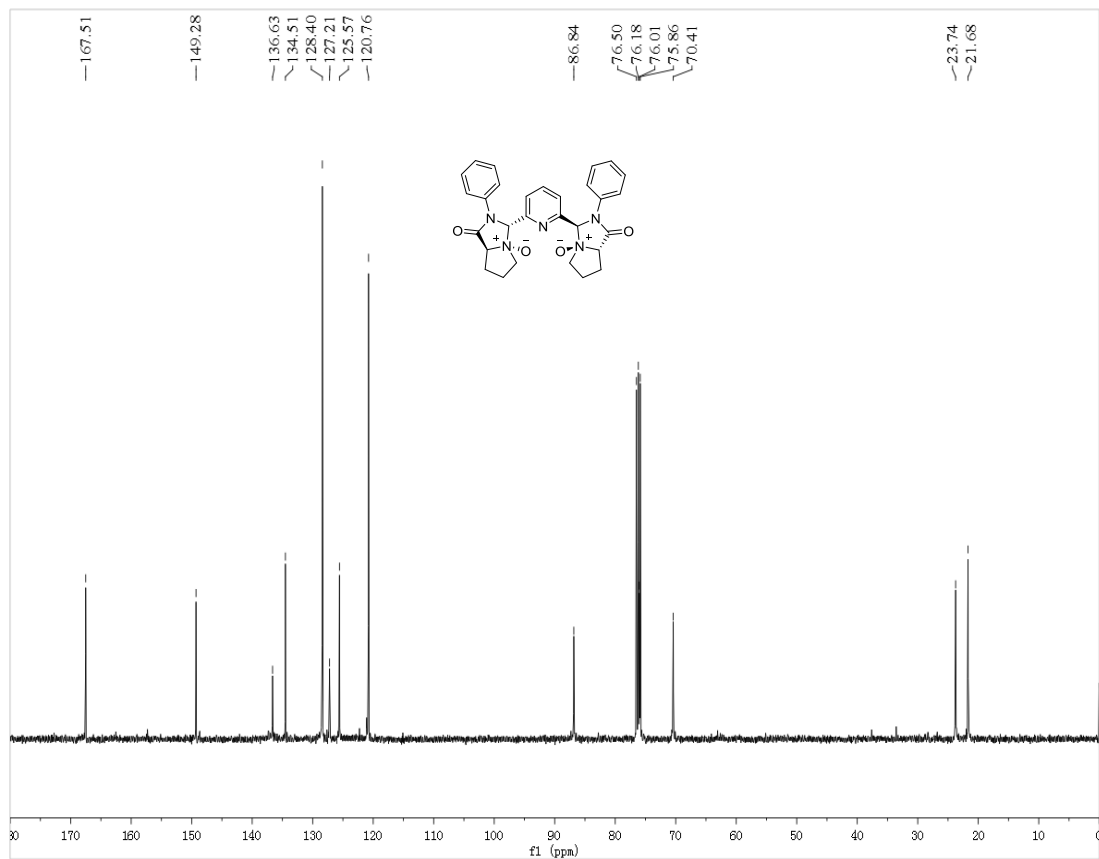

# <sup>1</sup>H and <sup>13</sup>C NMR of L1e

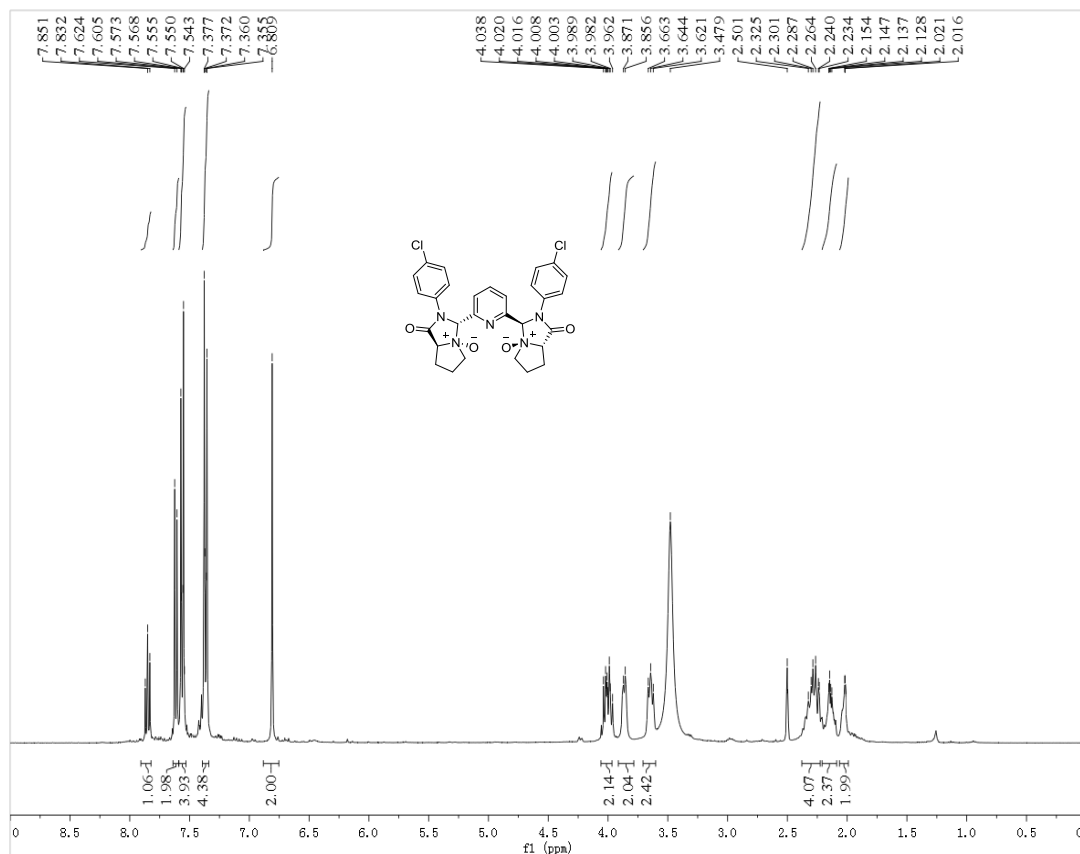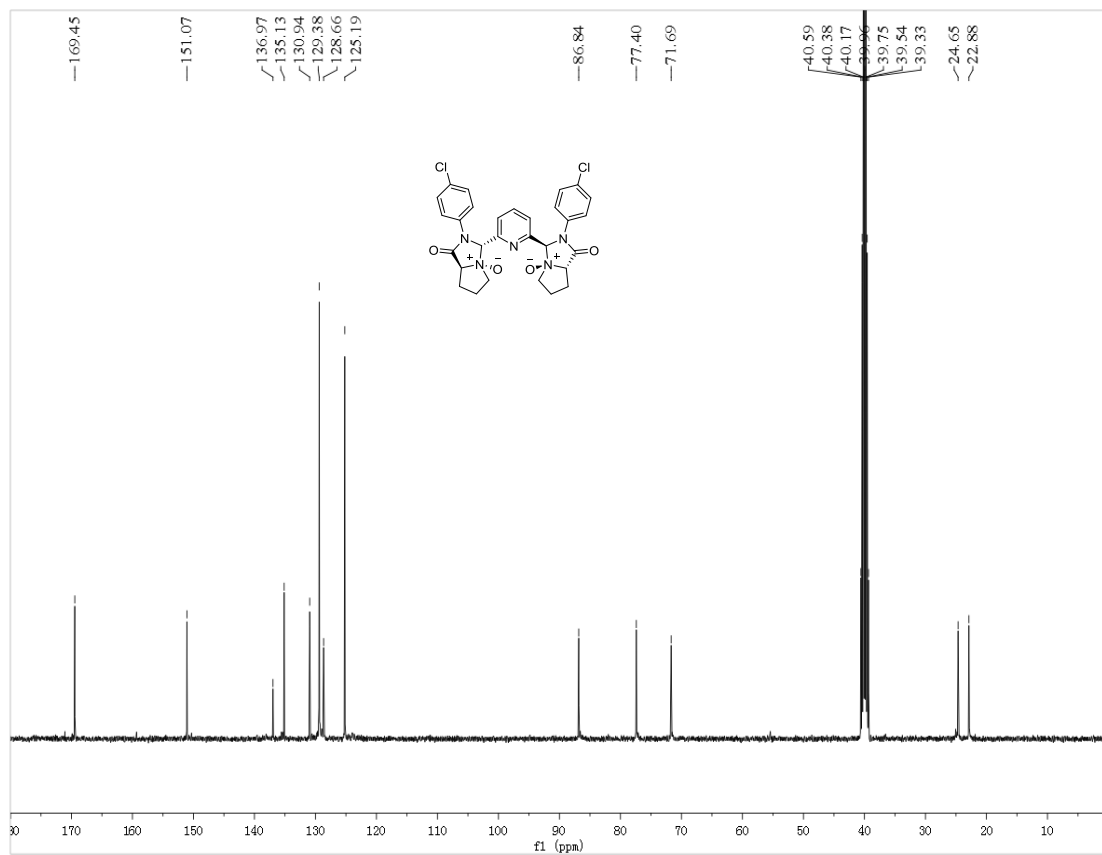

# <sup>1</sup>H and <sup>13</sup>C NMR of L1f

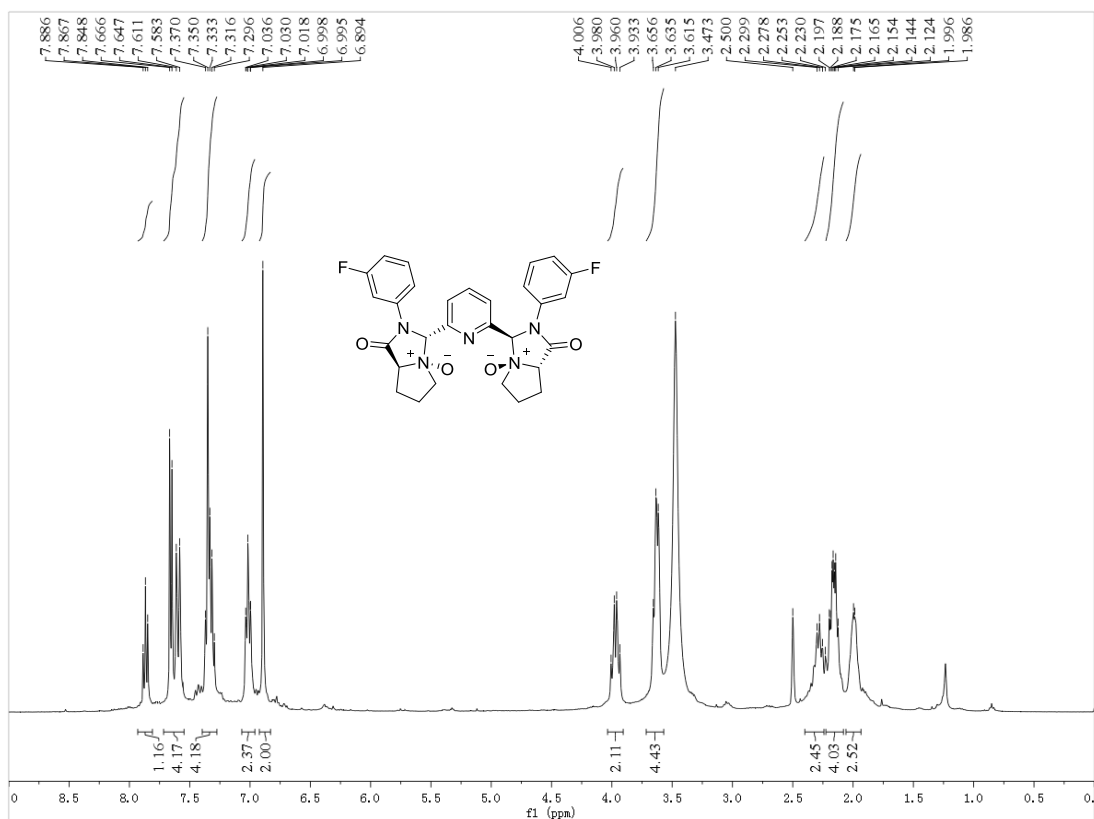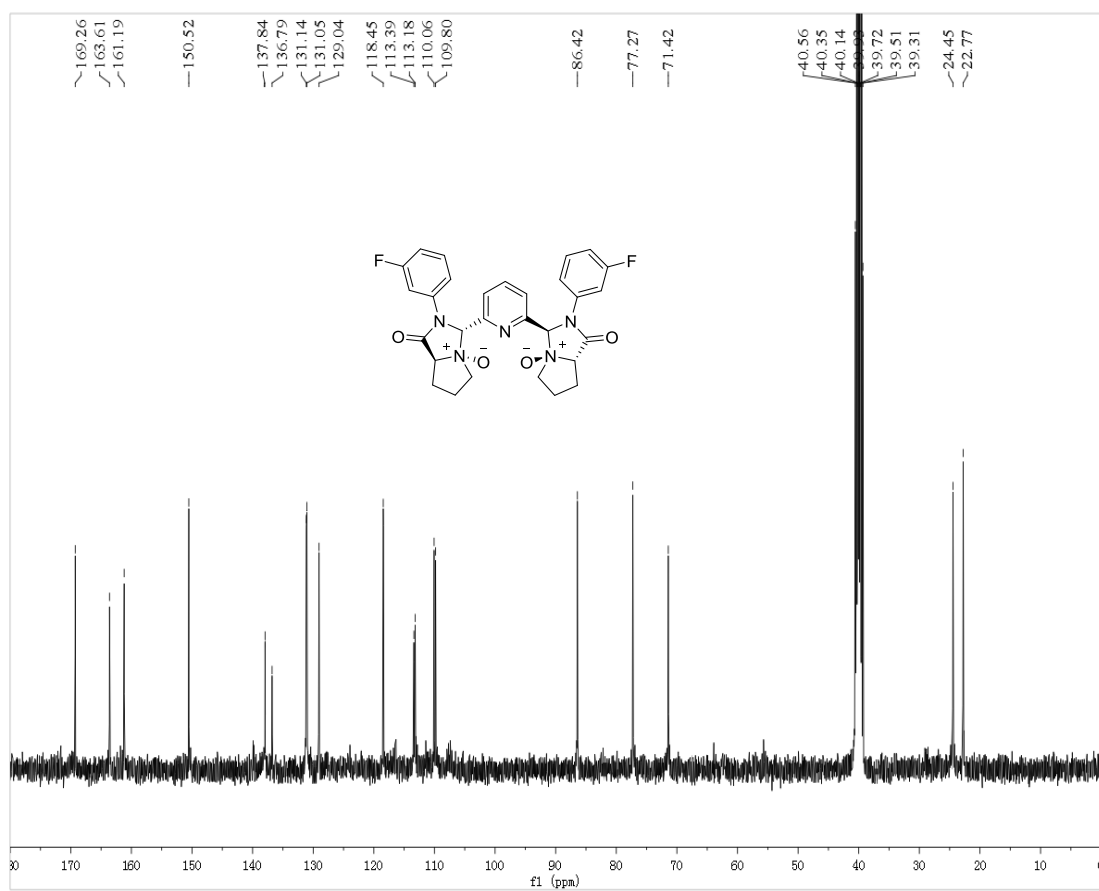

# $^1\text{H}$ and $^{13}\text{C}$ NMR of L1g

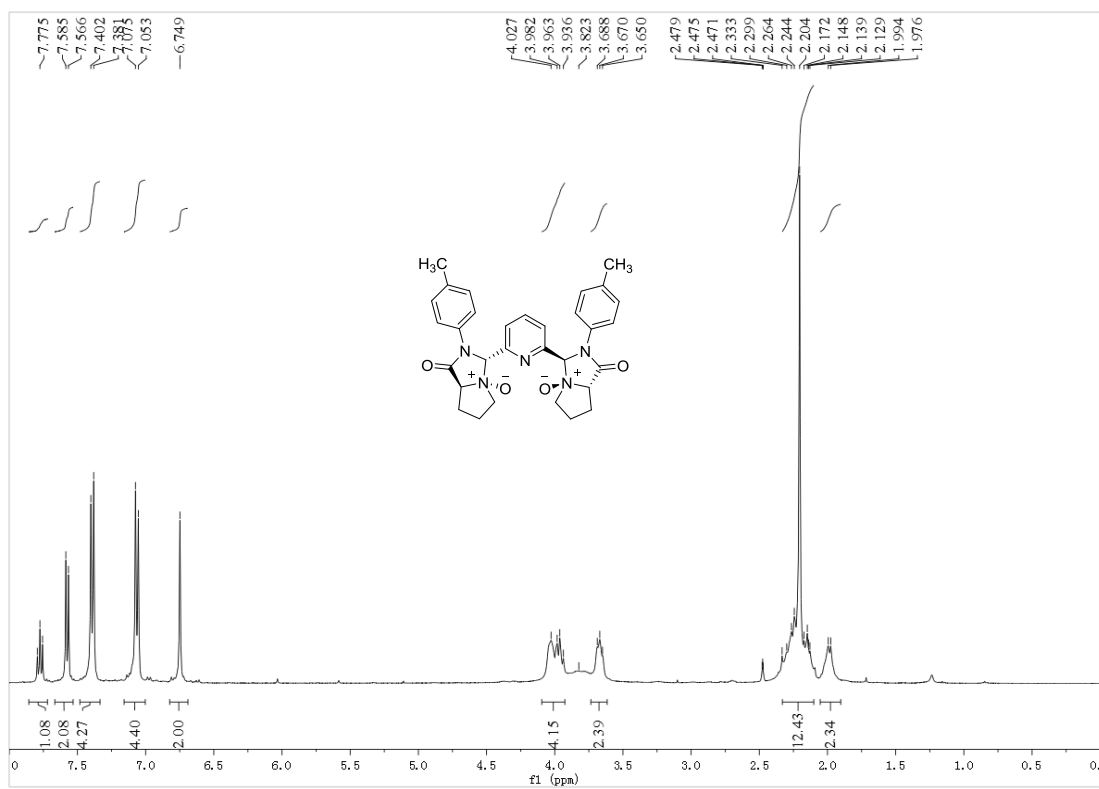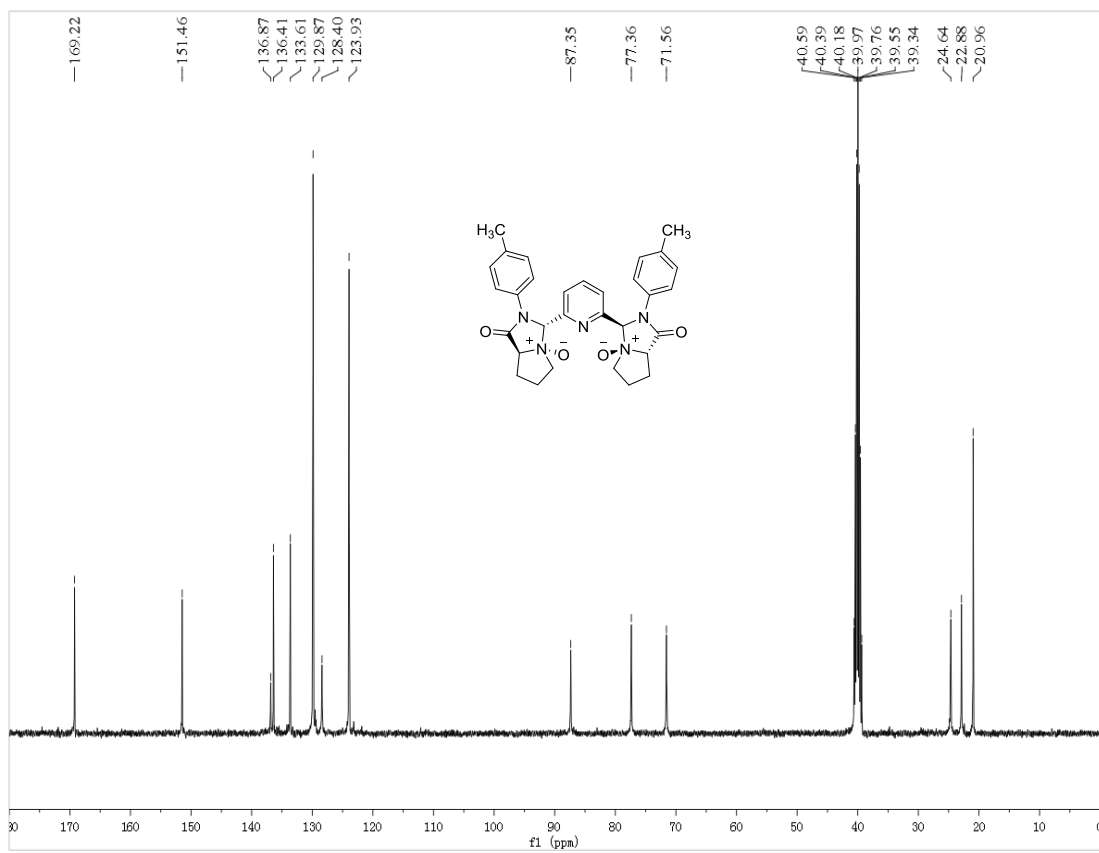



# $^1\text{H}$ and $^{13}\text{C}$ NMR of L1h

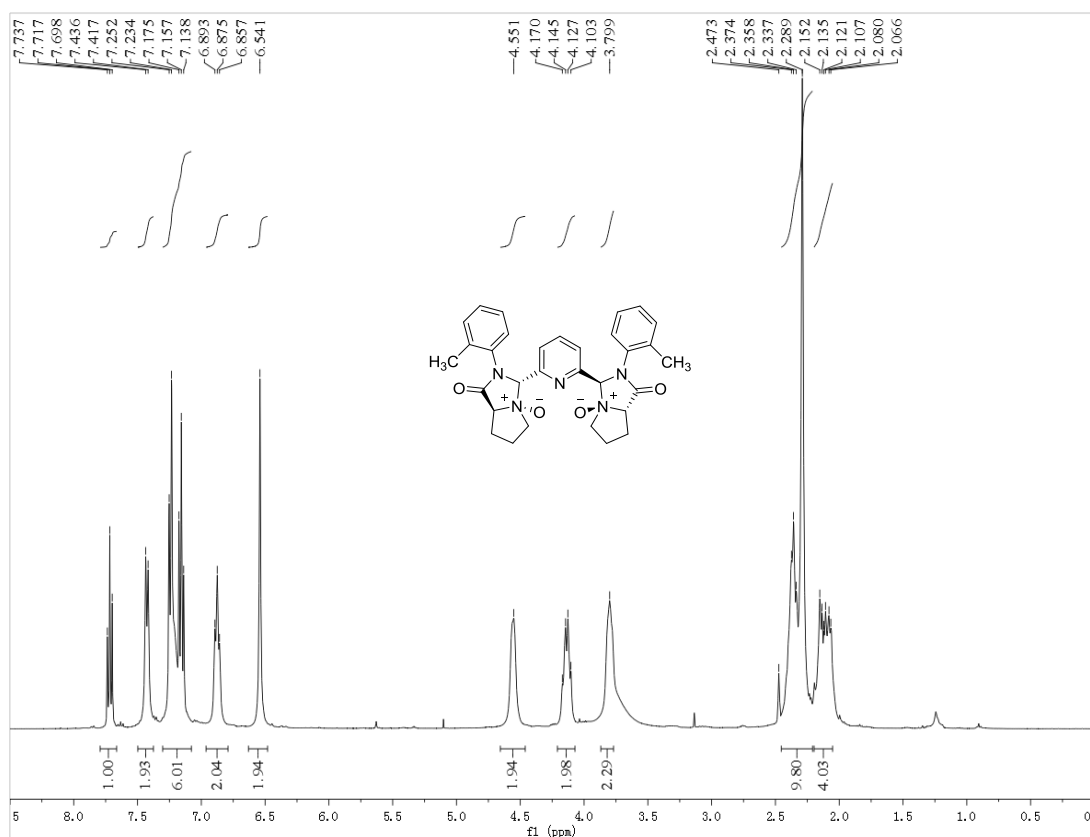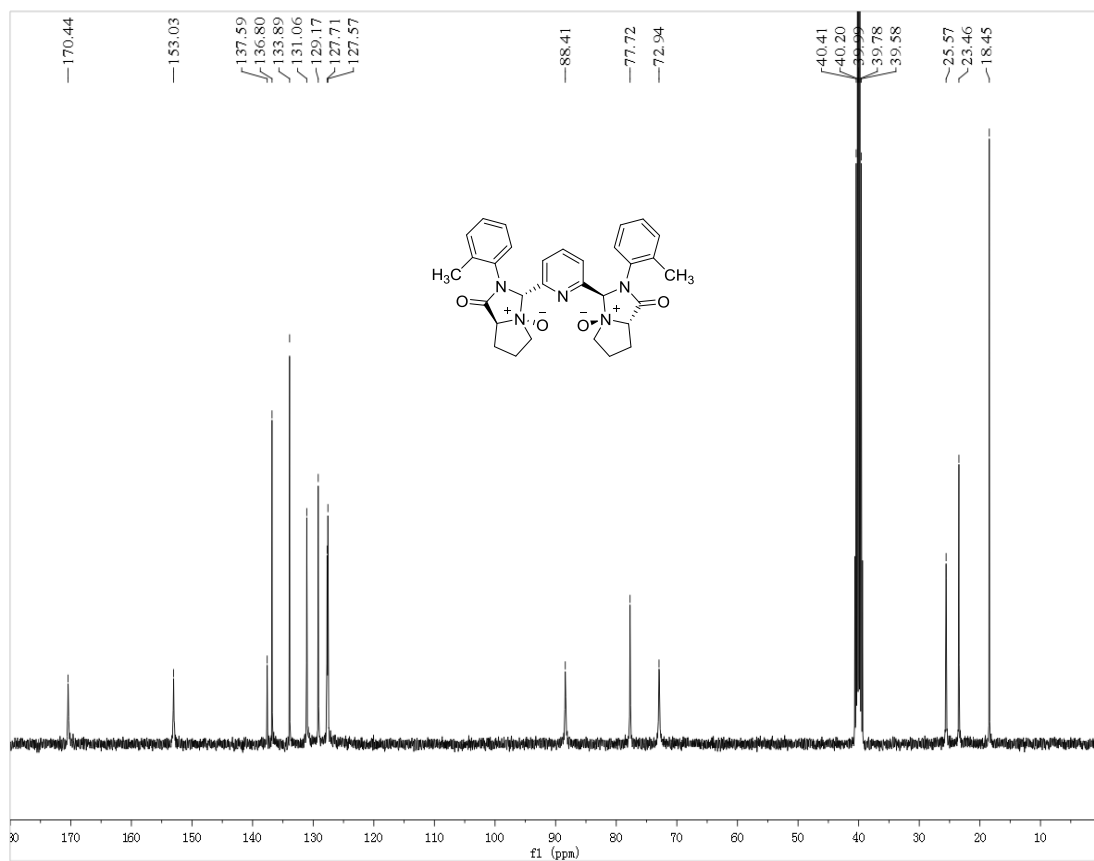

# $^1\text{H}$ and $^{13}\text{C}$ NMR of L1i

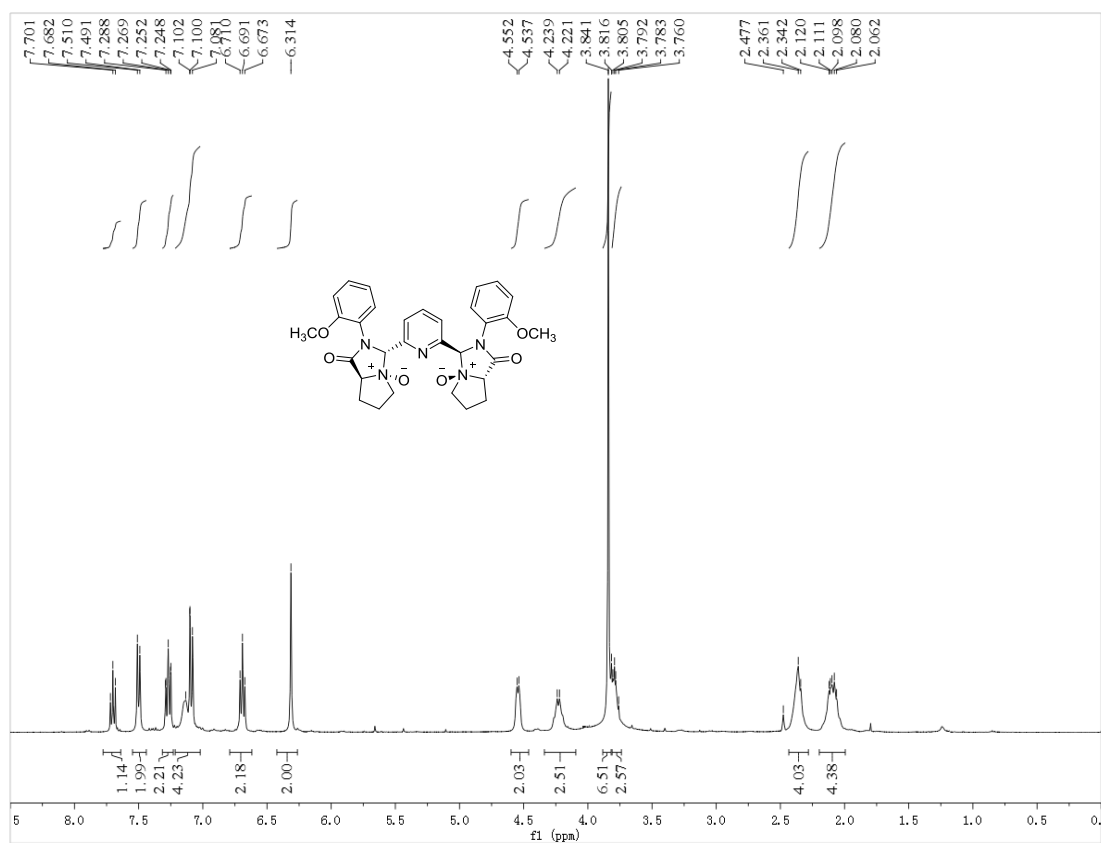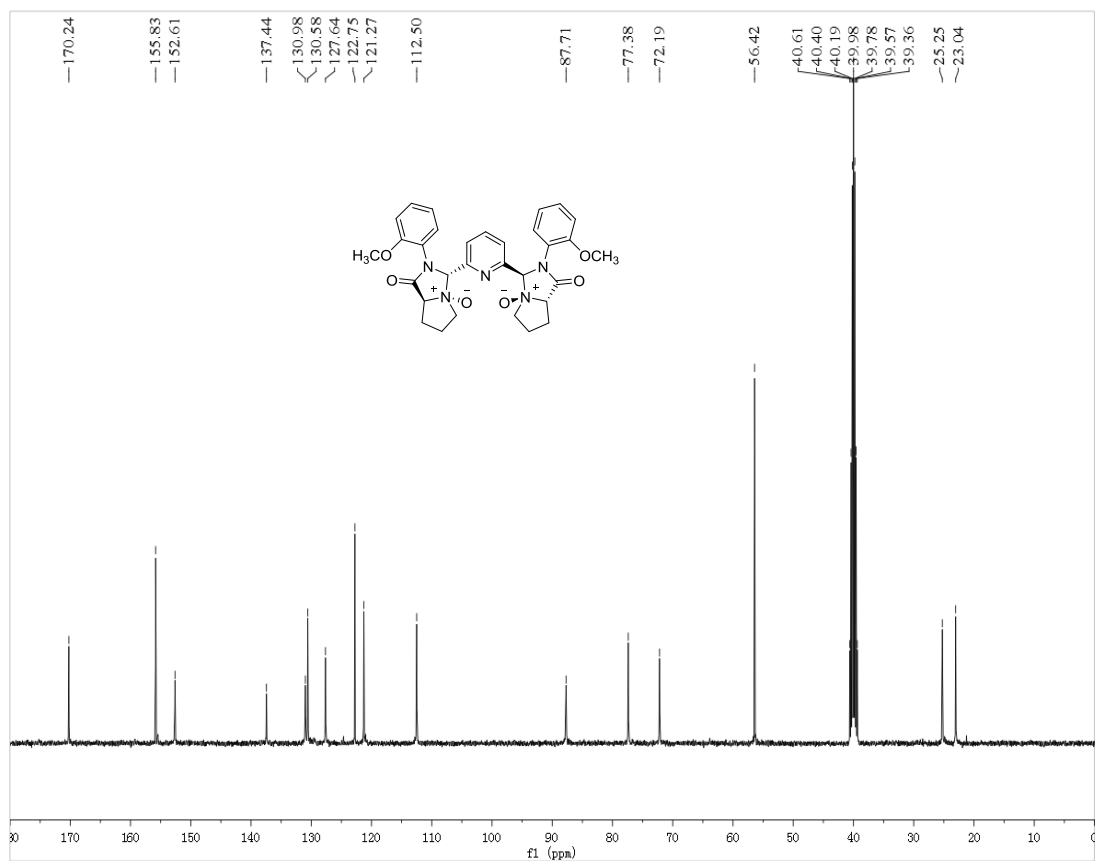

# <sup>1</sup>H and <sup>13</sup>C NMR of L2a

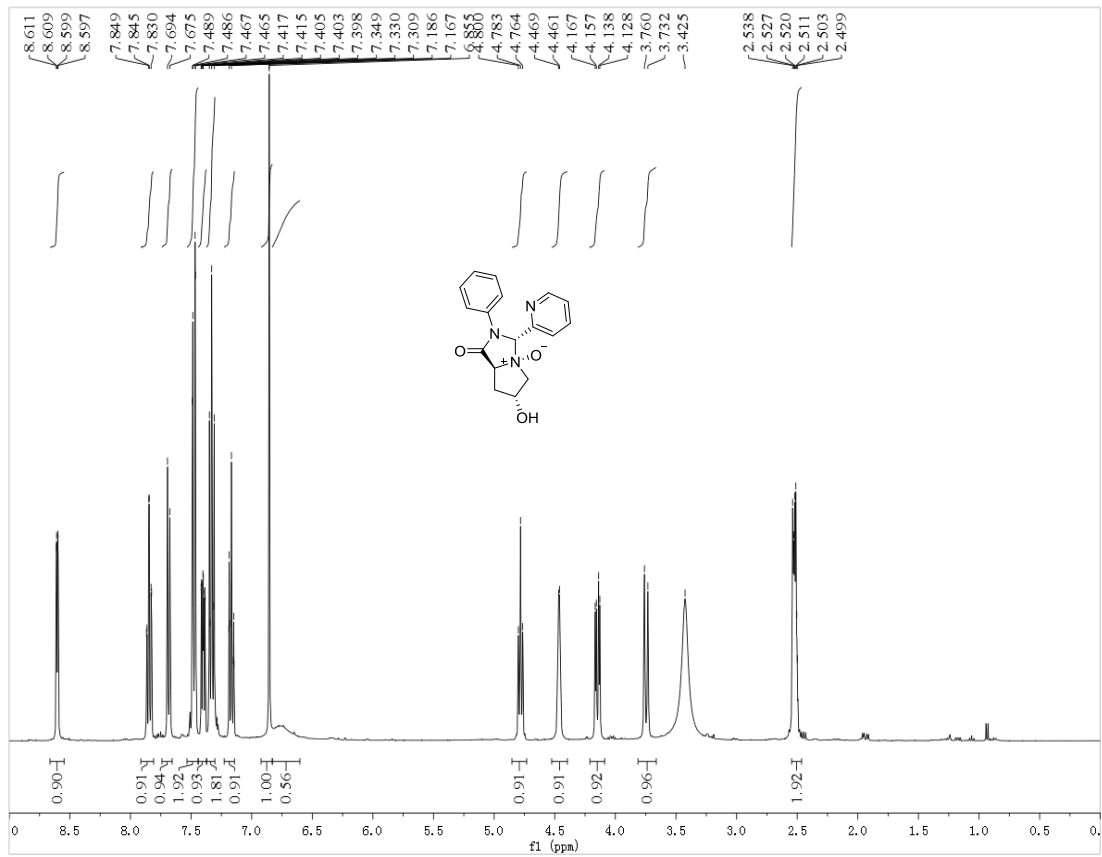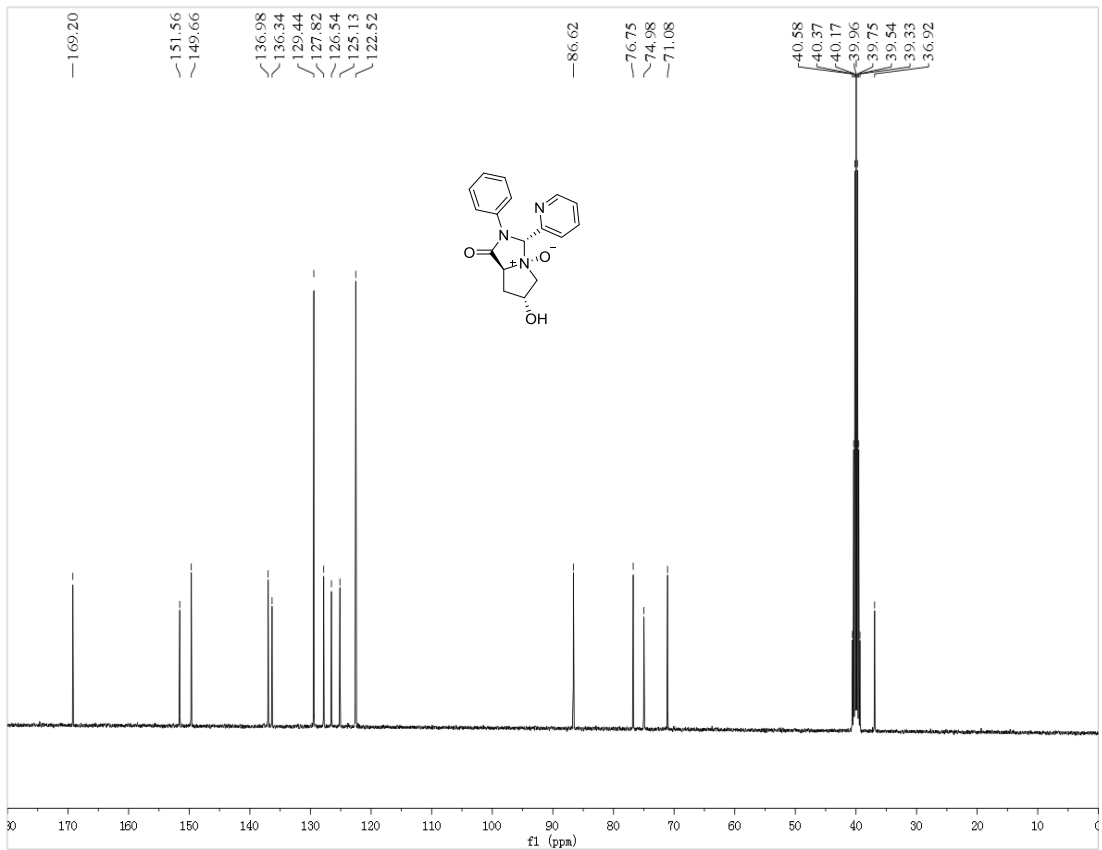

# <sup>1</sup>H and <sup>13</sup>C NMR of L2b

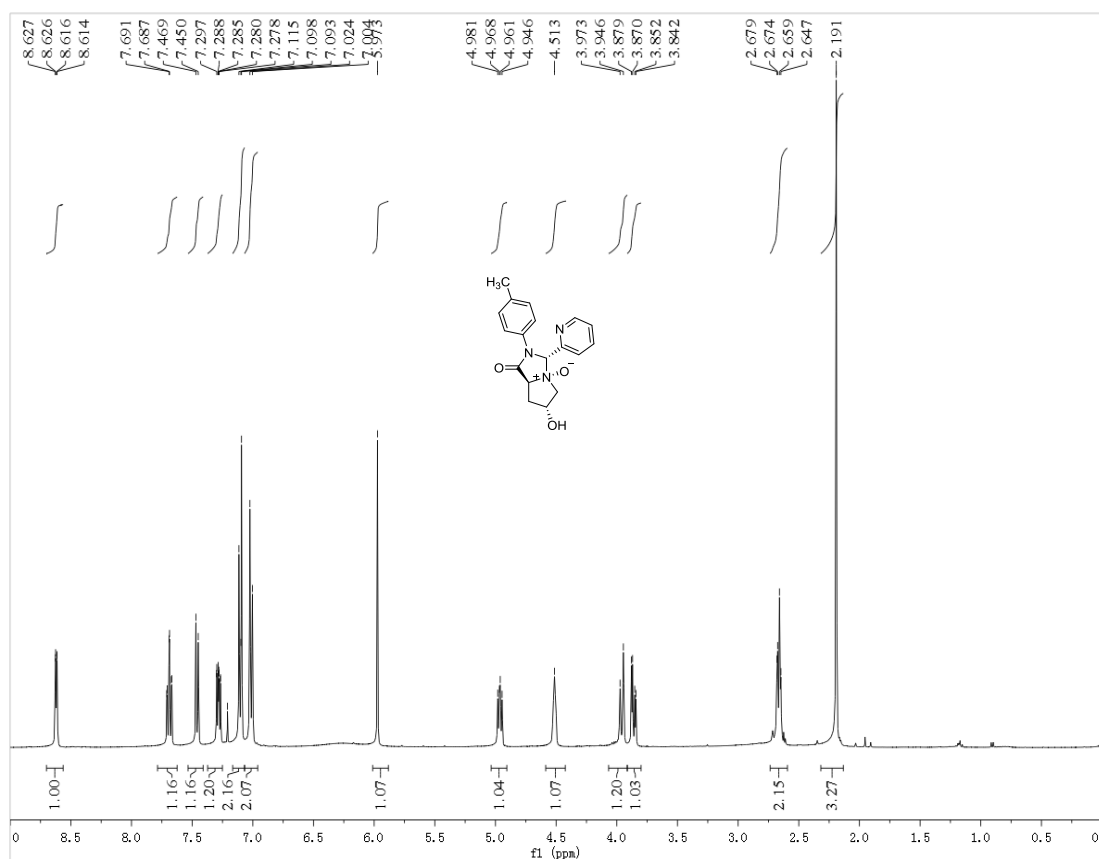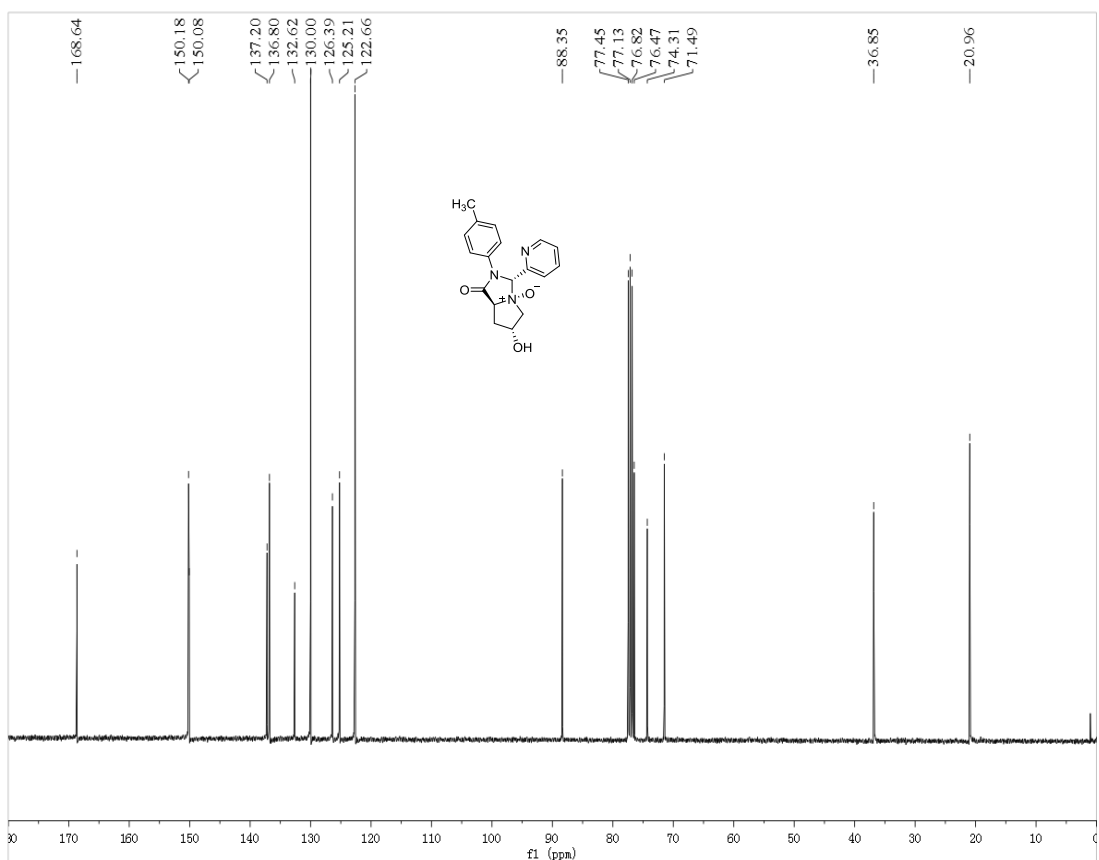

# <sup>1</sup>H and <sup>13</sup>C NMR of L2c

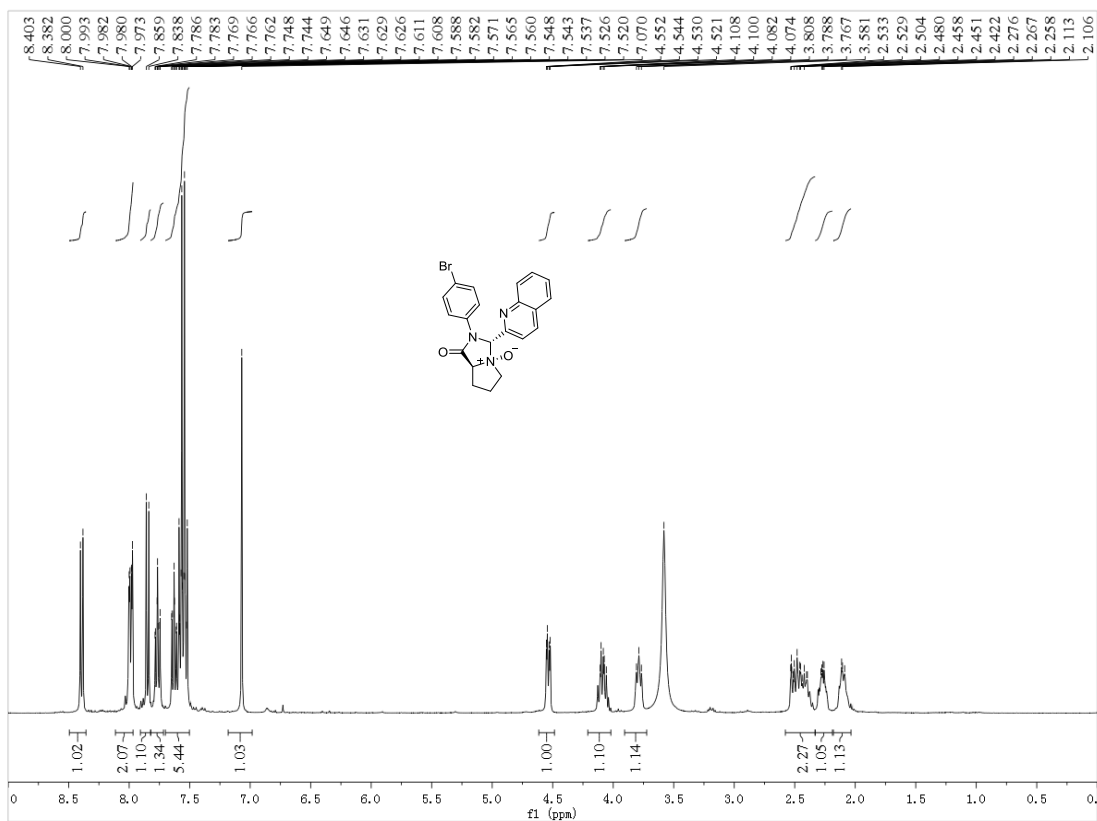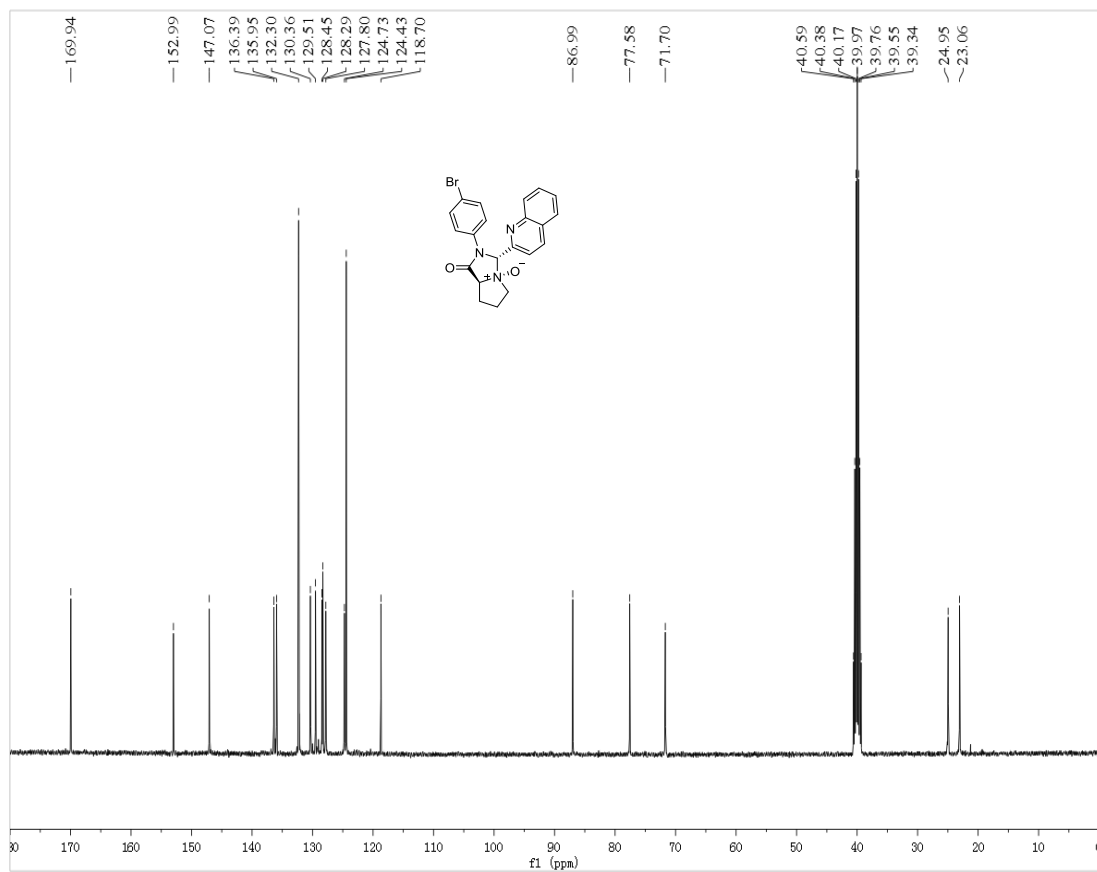

# <sup>1</sup>H and <sup>13</sup>C NMR of L2d

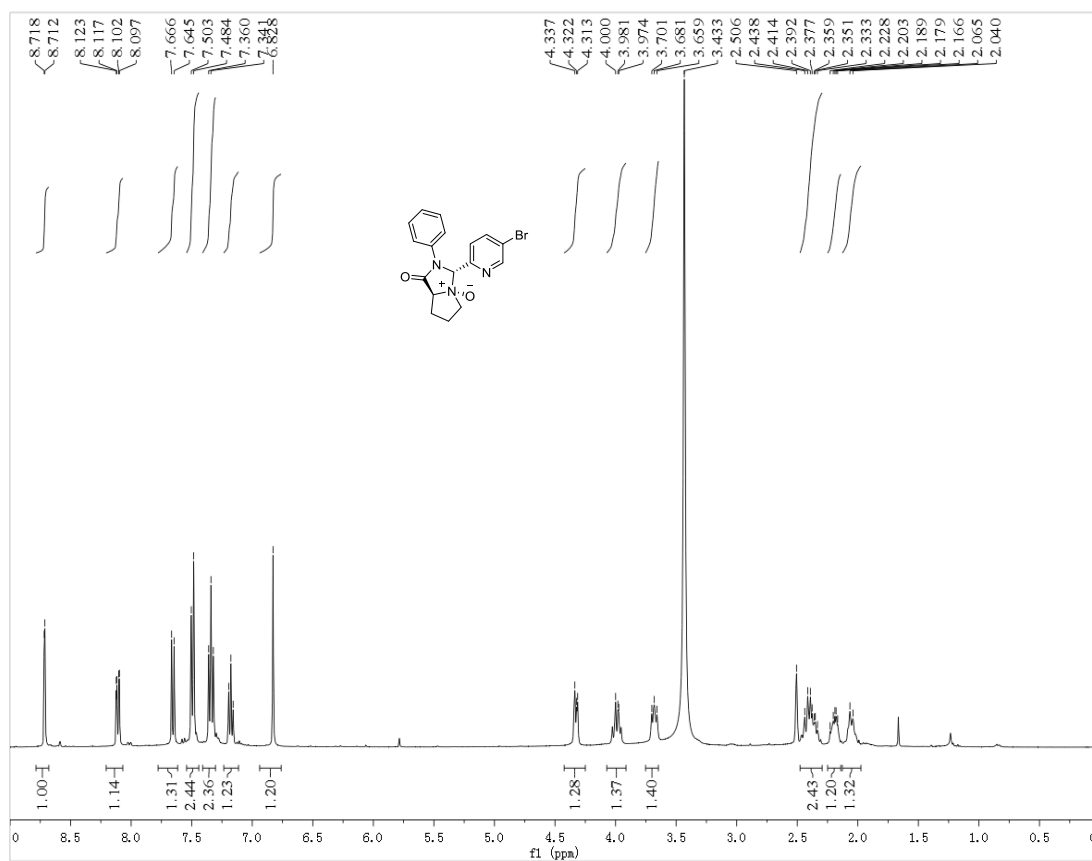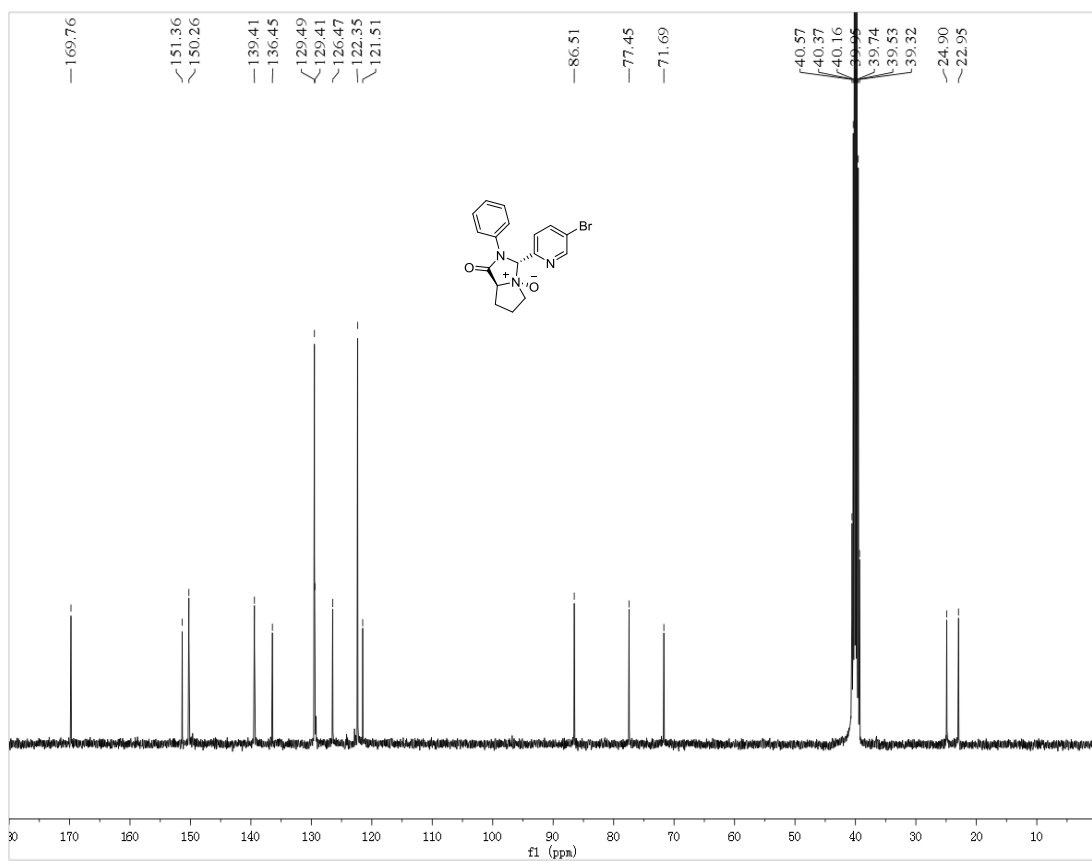

# $^1\text{H}$ and $^{13}\text{C}$ NMR of 3d

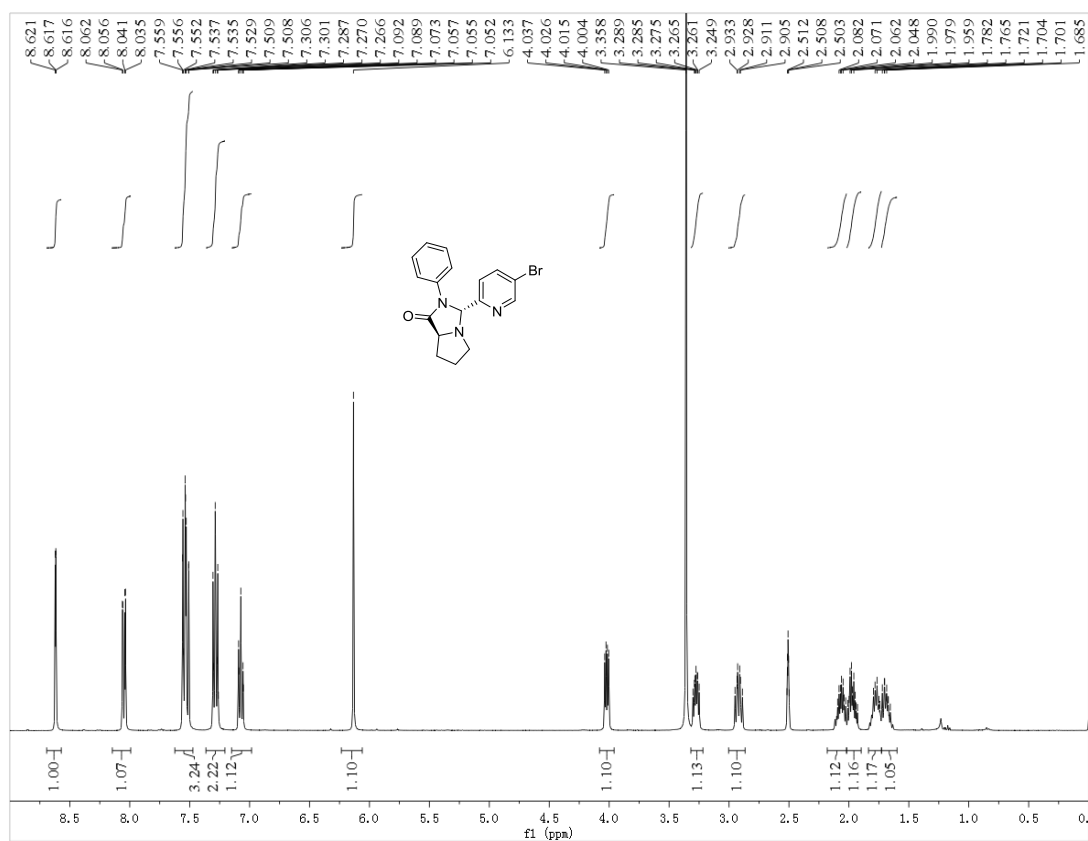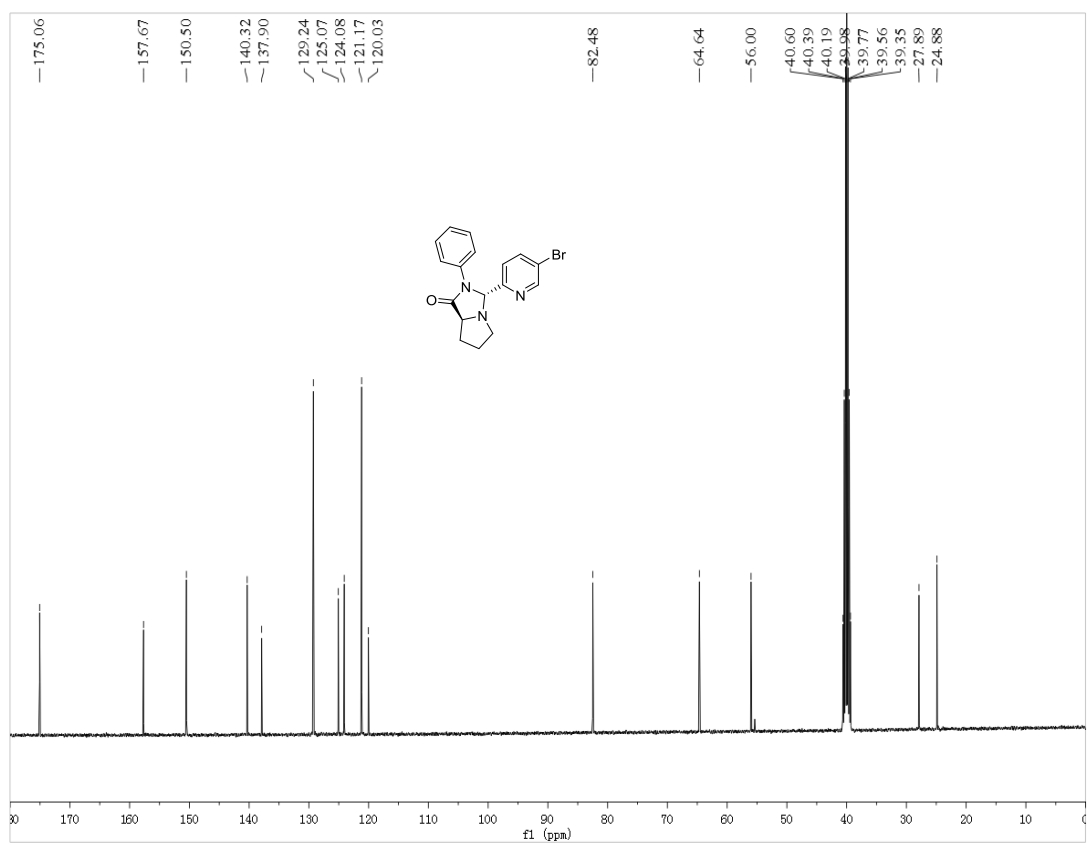

# $^1\text{H}$ and $^{13}\text{C}$ NMR of L4a

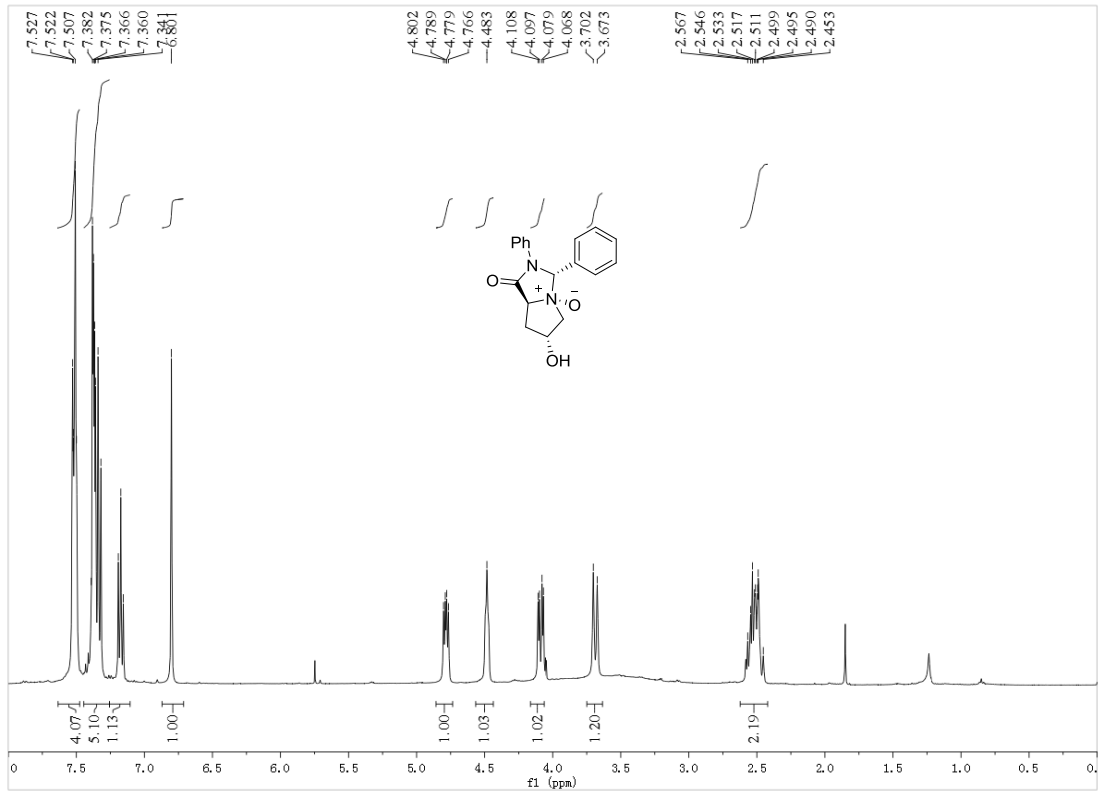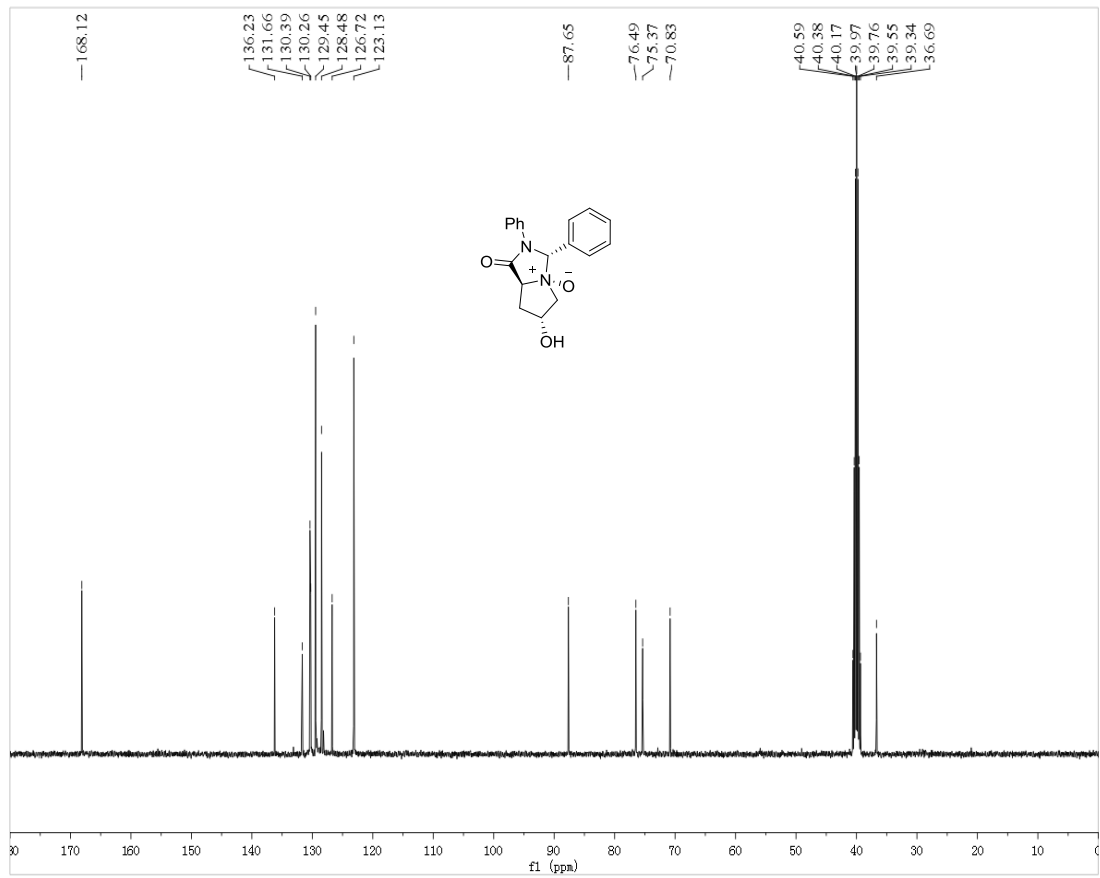



# <sup>1</sup>H and <sup>13</sup>C NMR of L6a

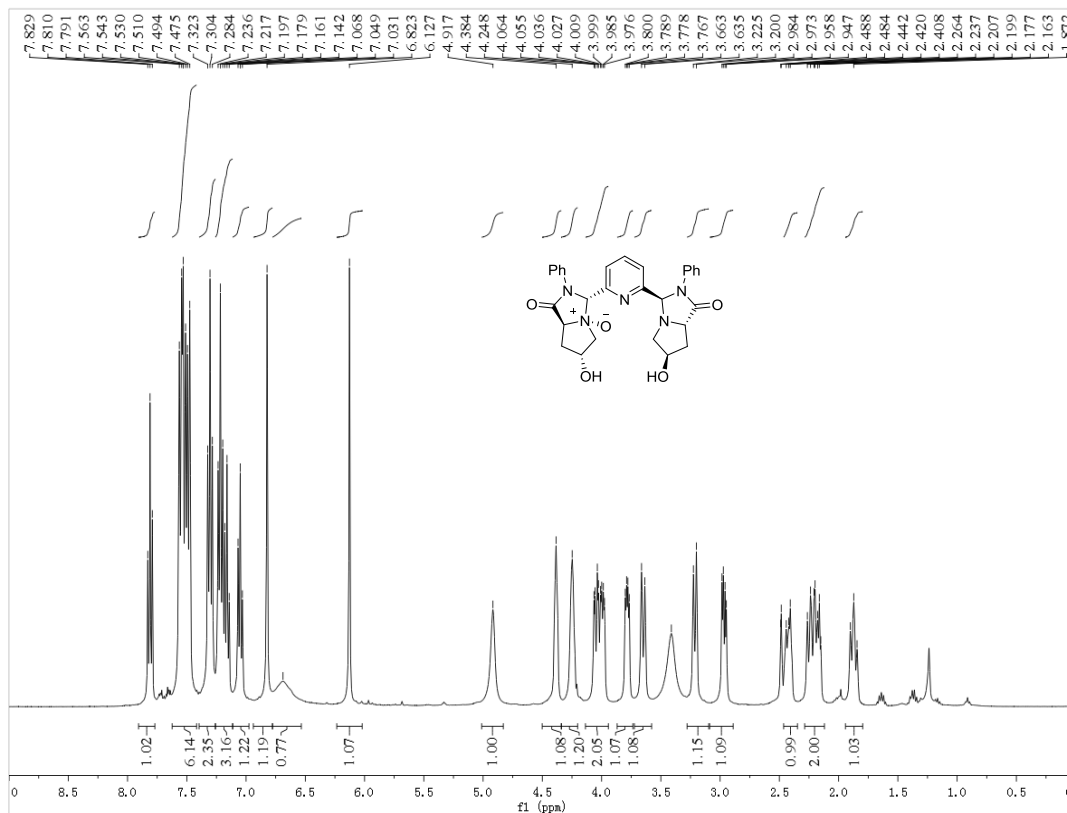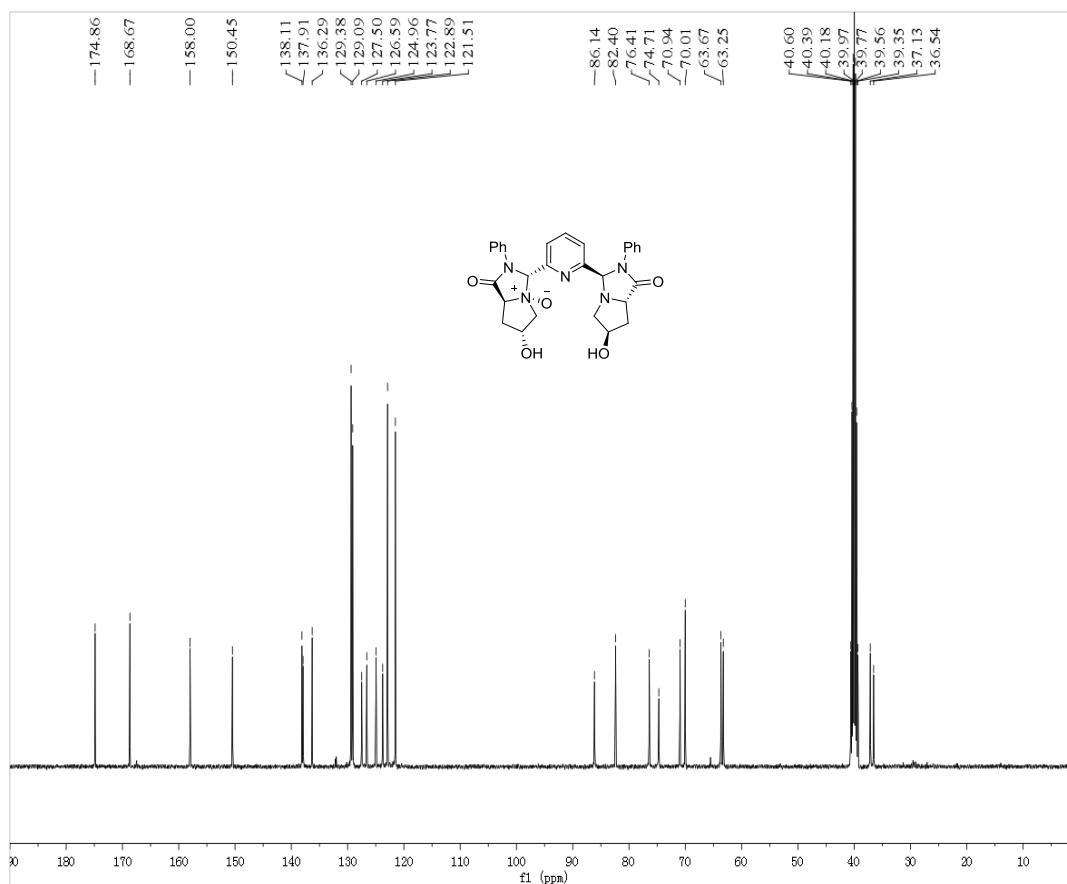

# $^1\text{H}$ and $^{13}\text{C}$ NMR of 6a

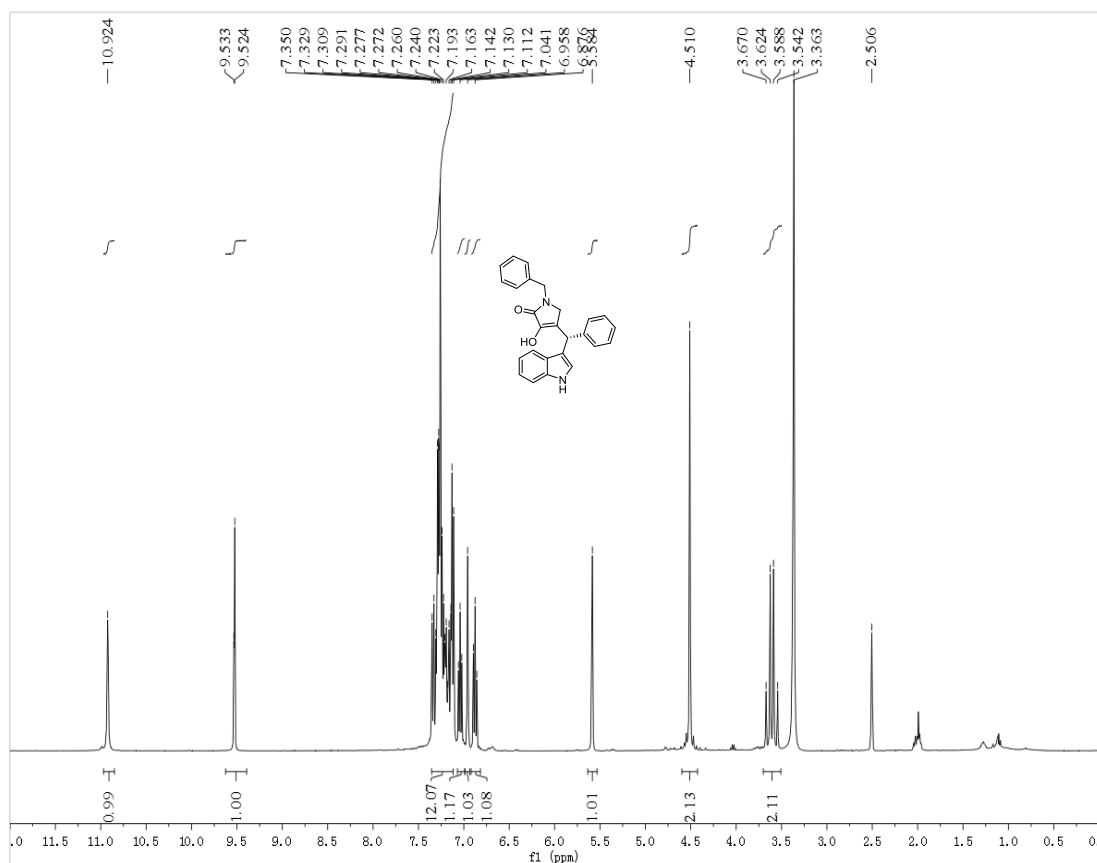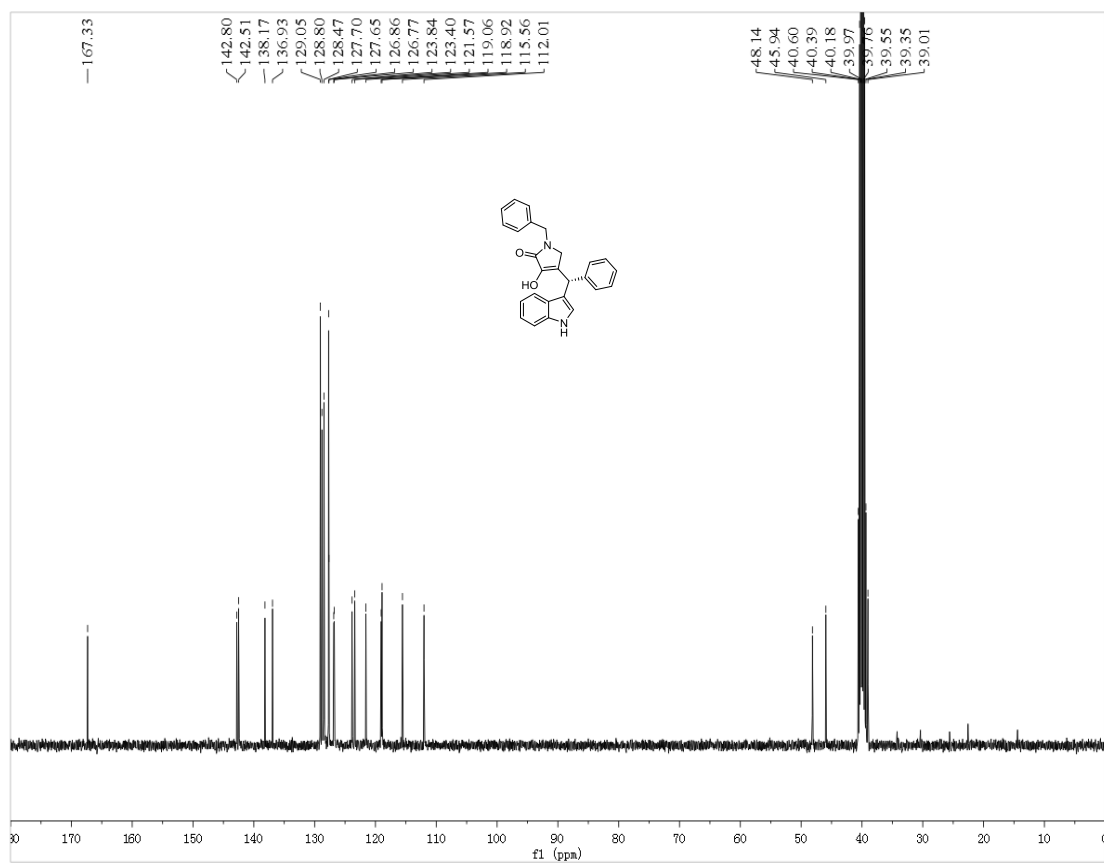

### HPLC of 6a

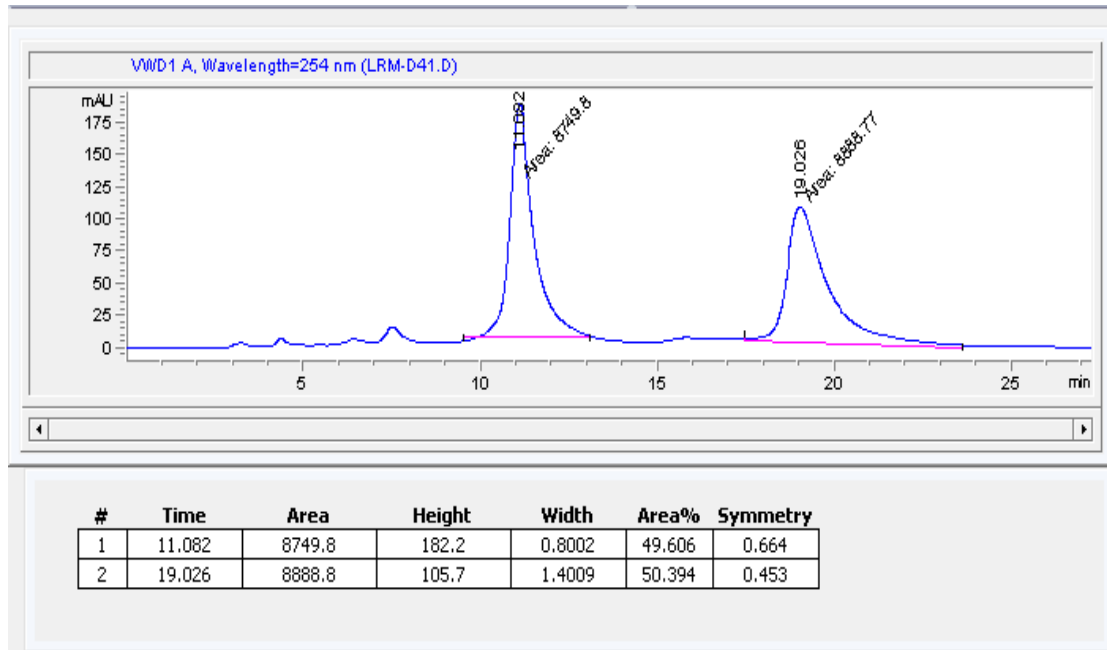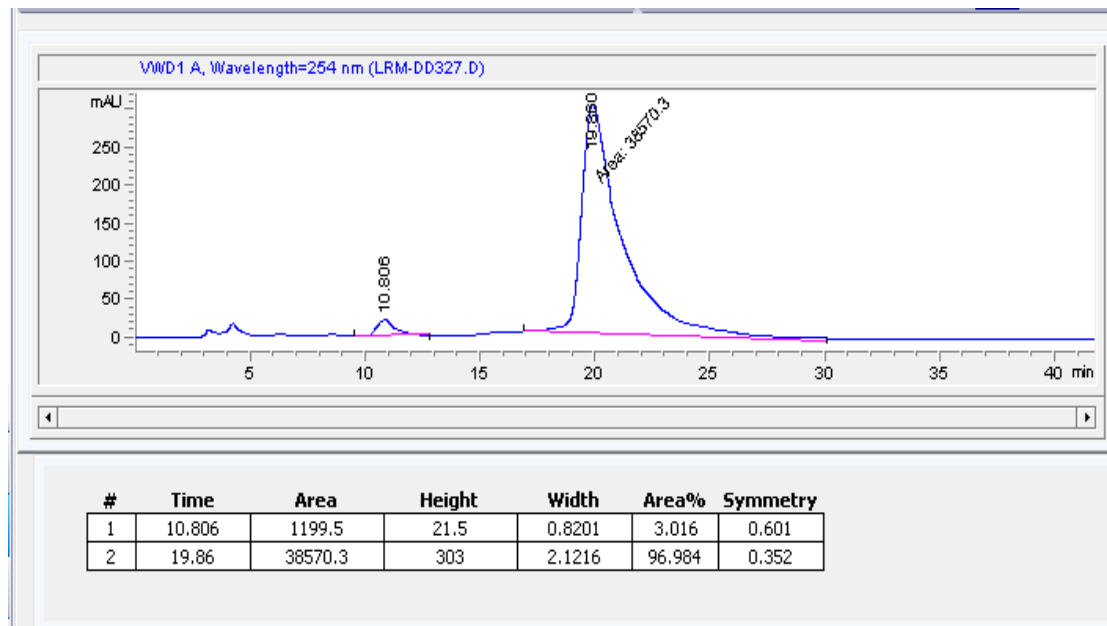

# $^1\text{H}$ and $^{13}\text{C}$ NMR of 6b

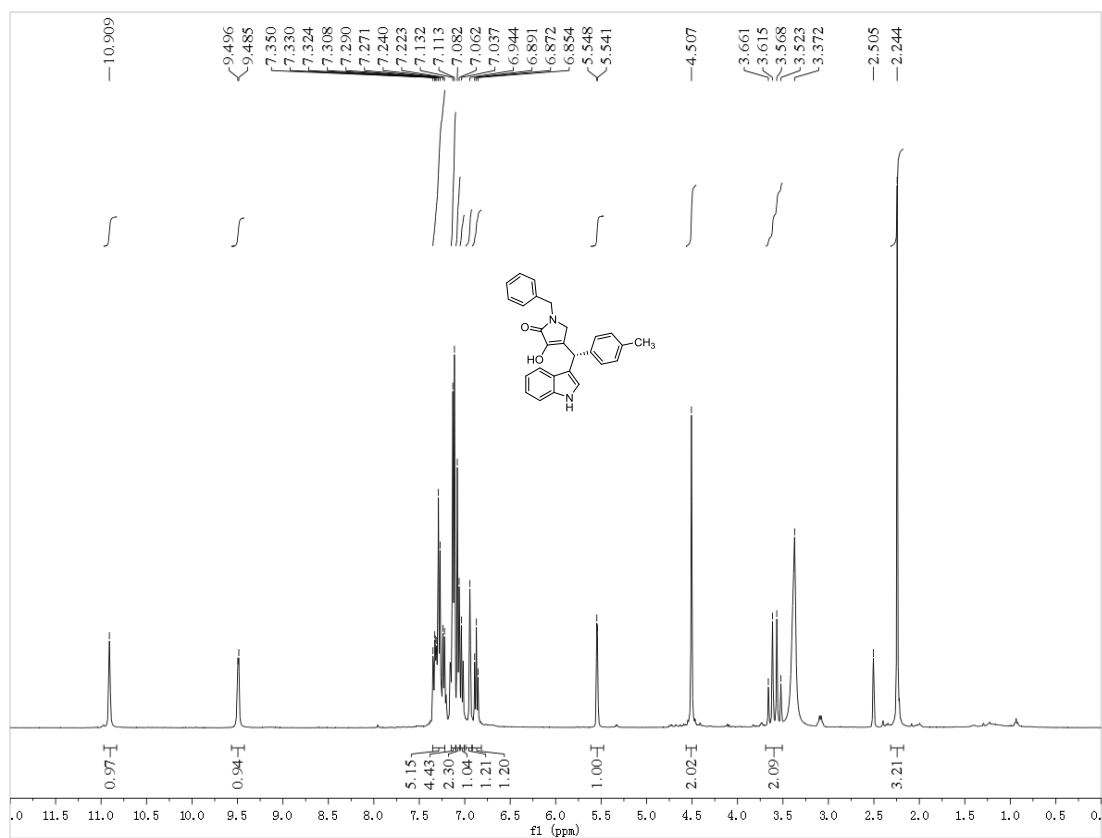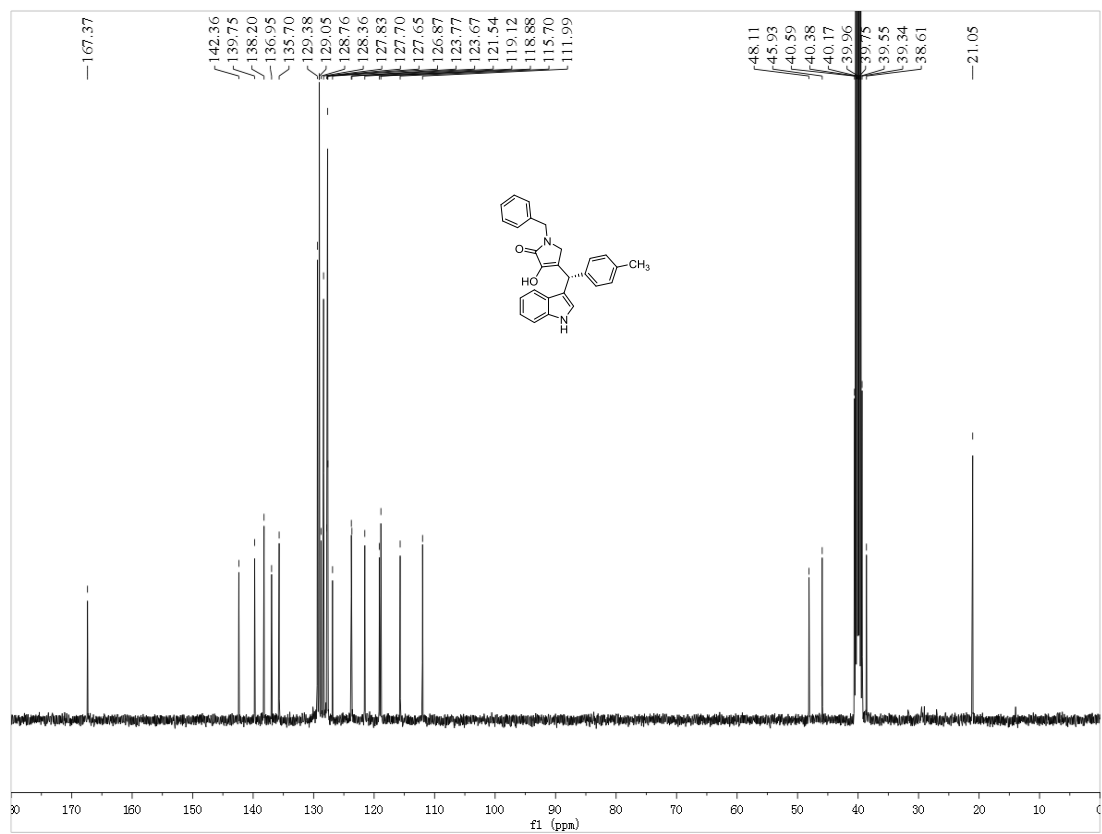

### HPLC of 6b

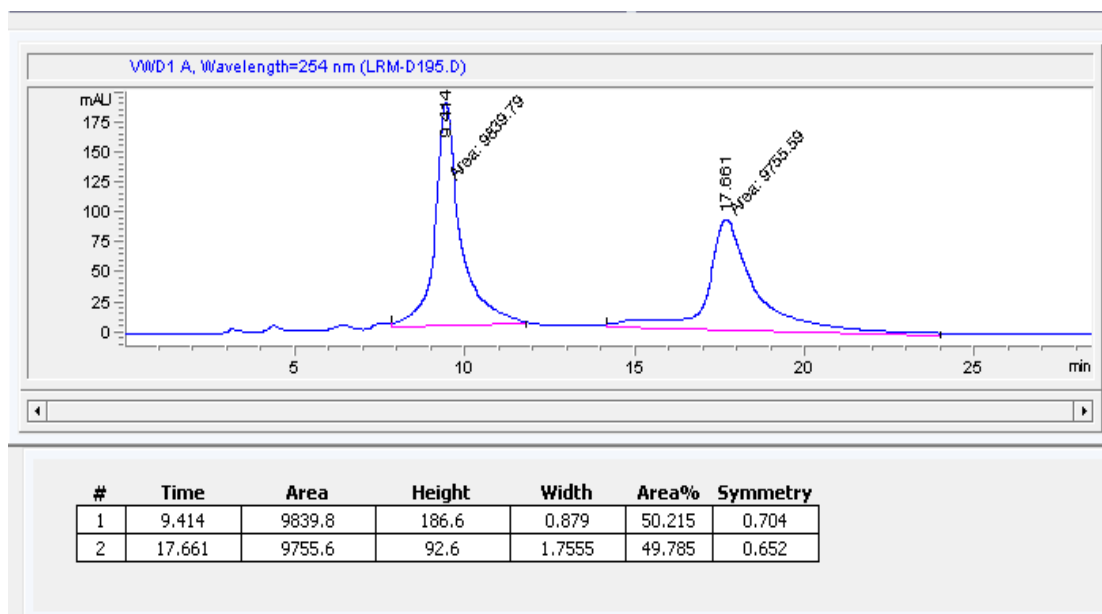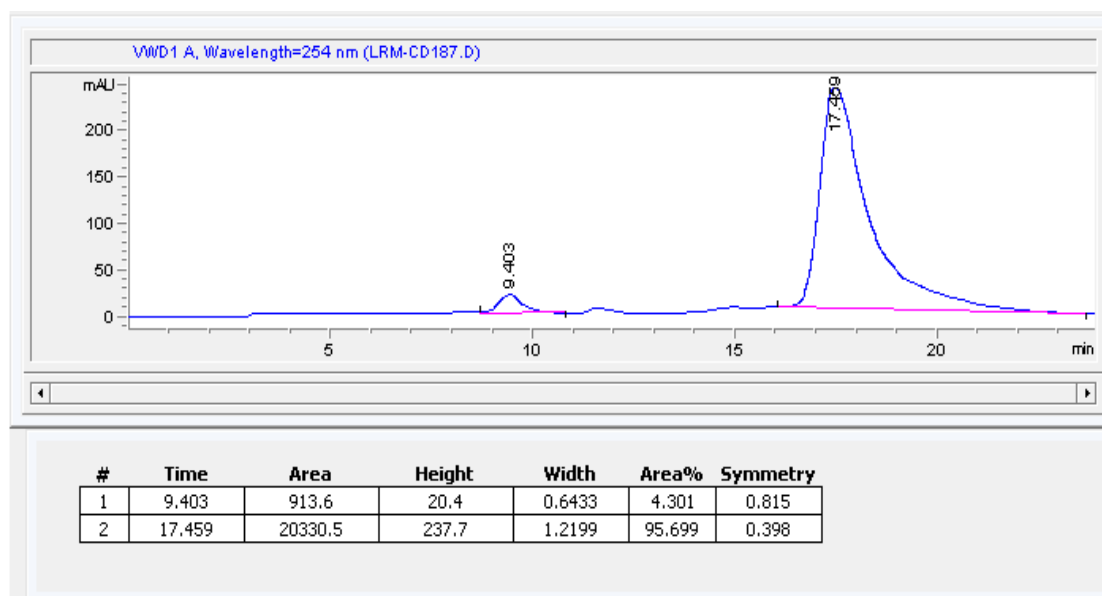

# $^1\text{H}$ and $^{13}\text{C}$ NMR of 6c

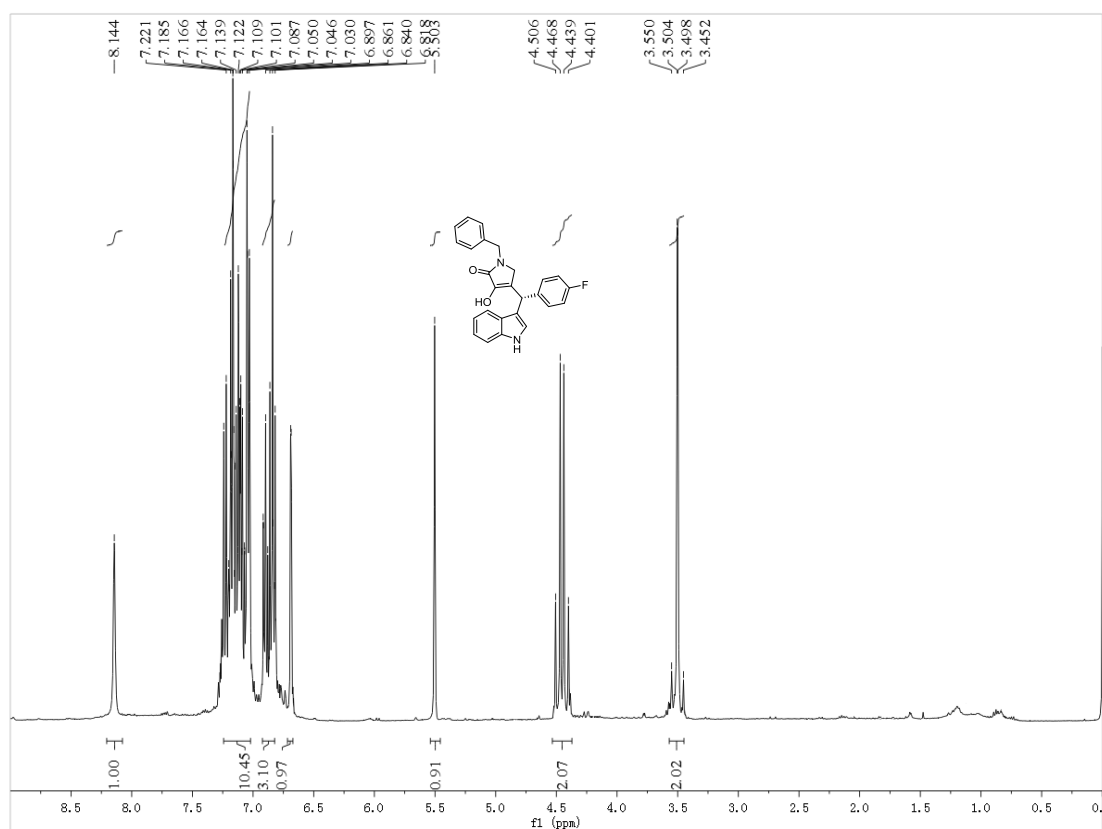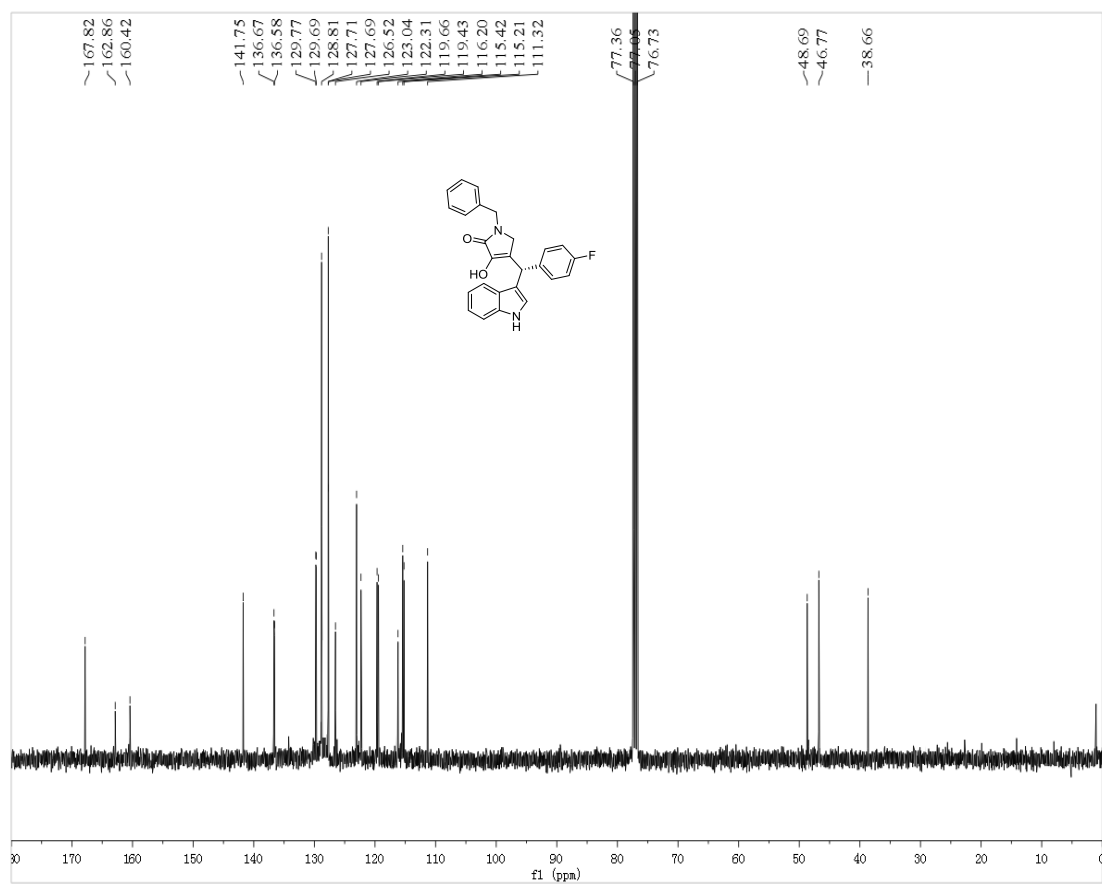

### HPLC of 6c

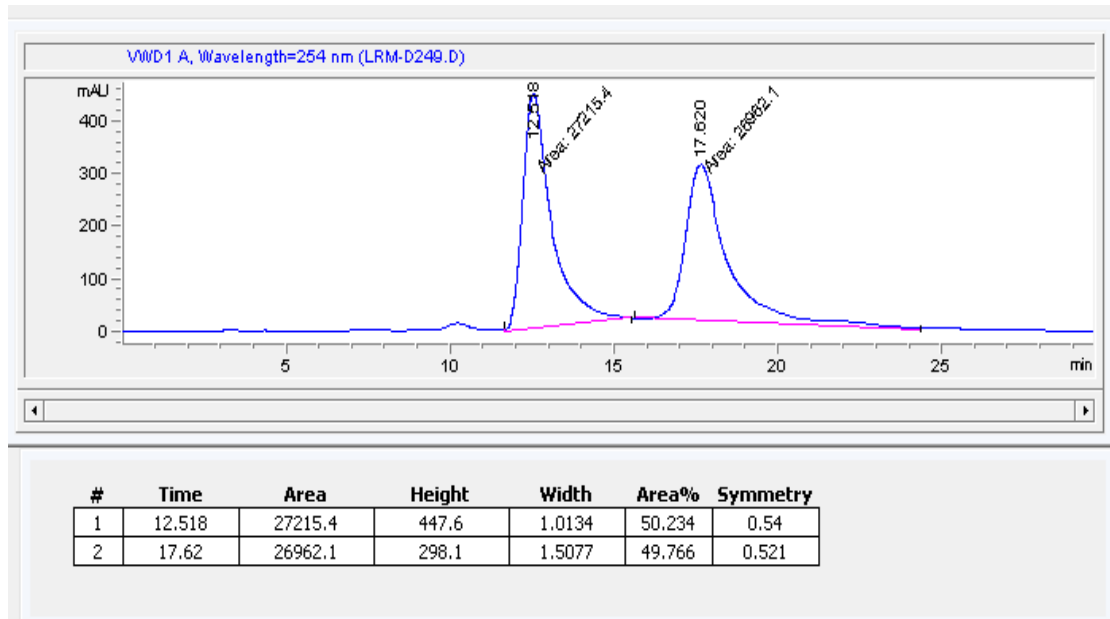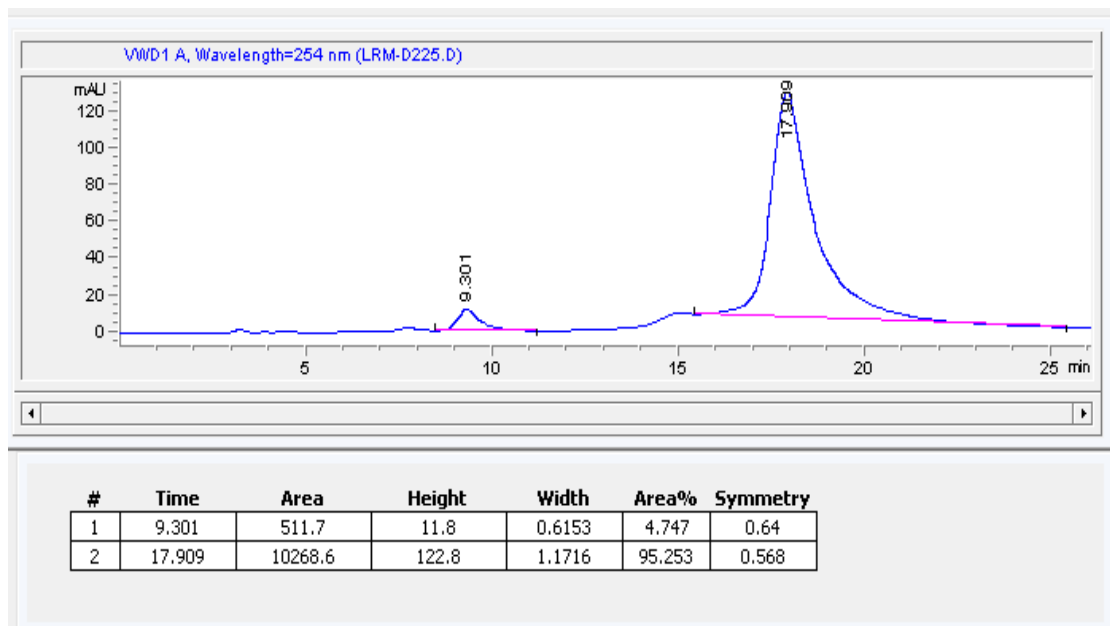

# $^1\text{H}$ and $^{13}\text{C}$ NMR of 6d

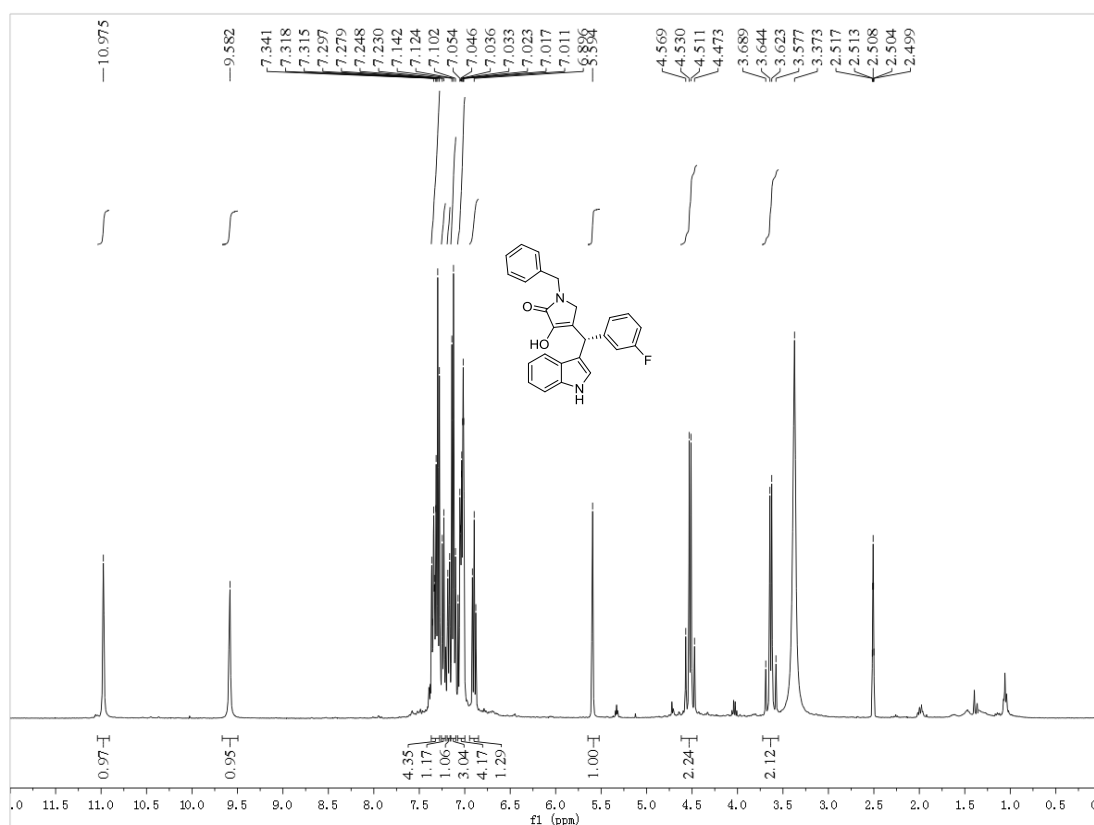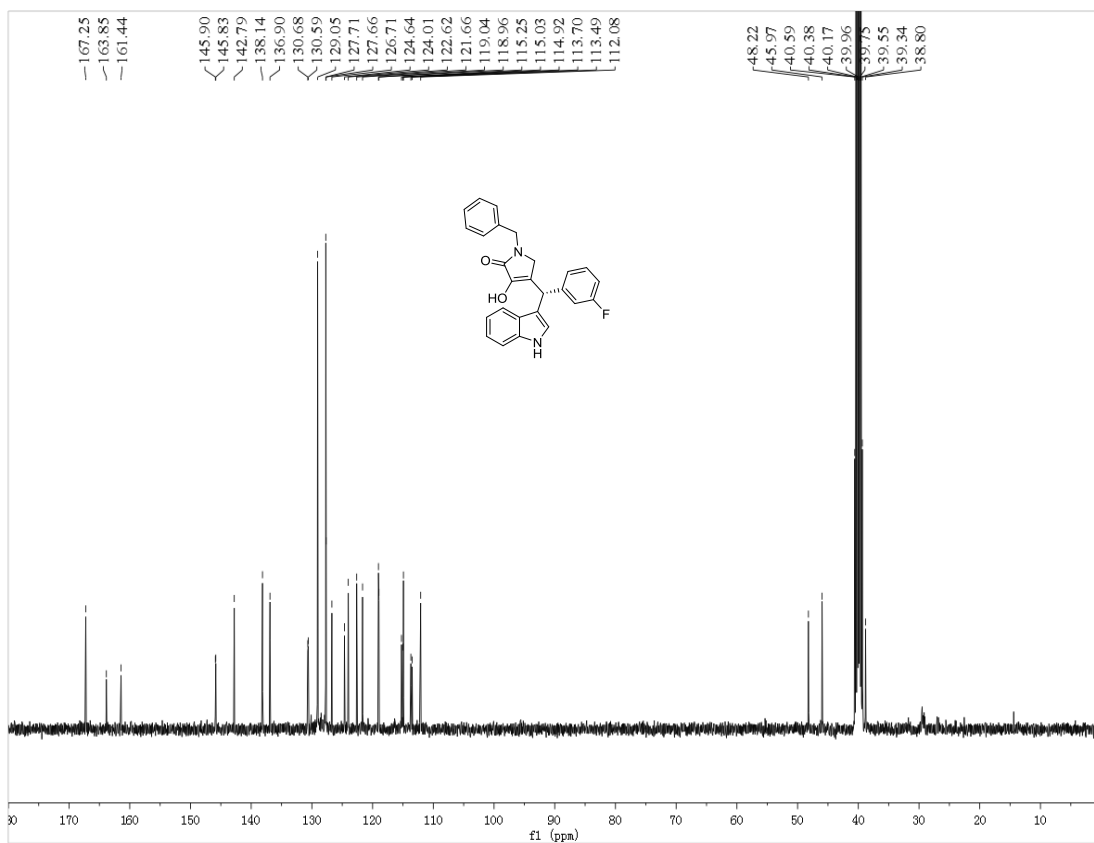



### HPLC of 6d

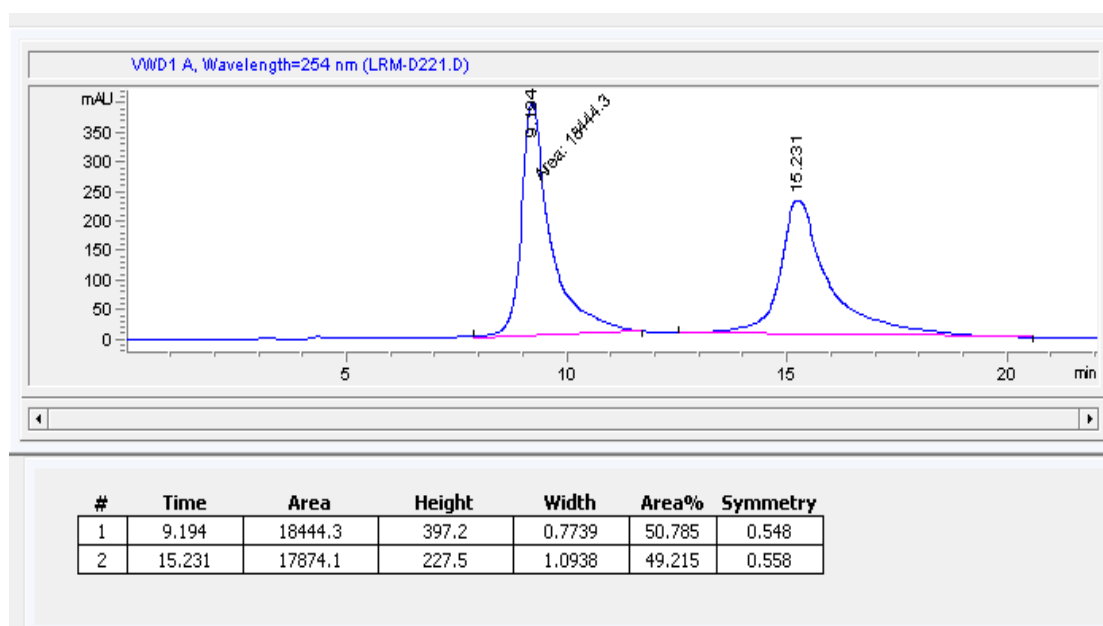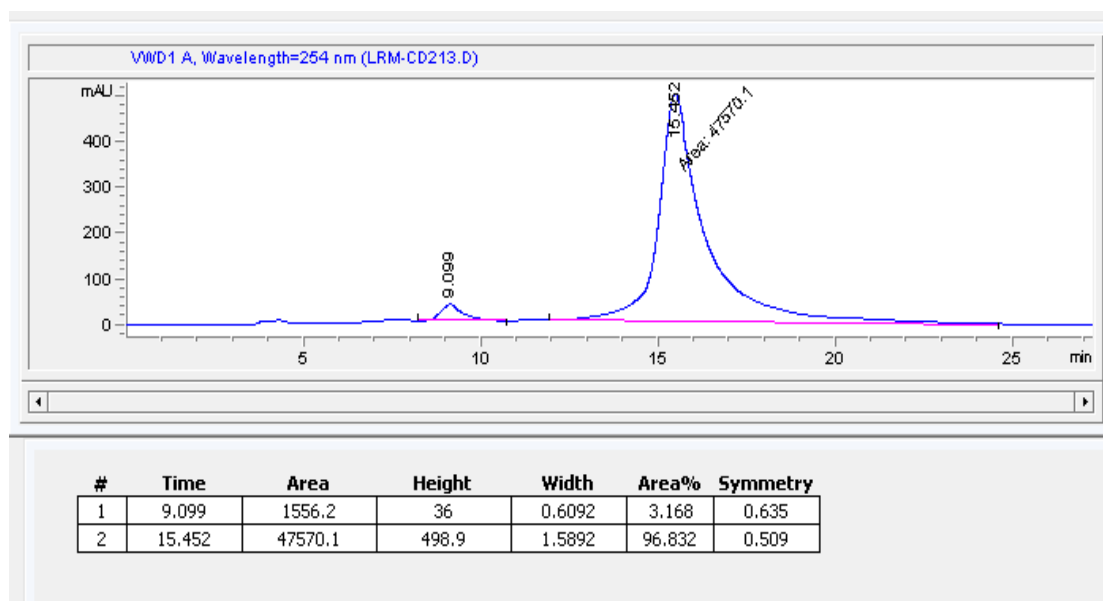

# $^1\text{H}$ and $^{13}\text{C}$ NMR of 6e

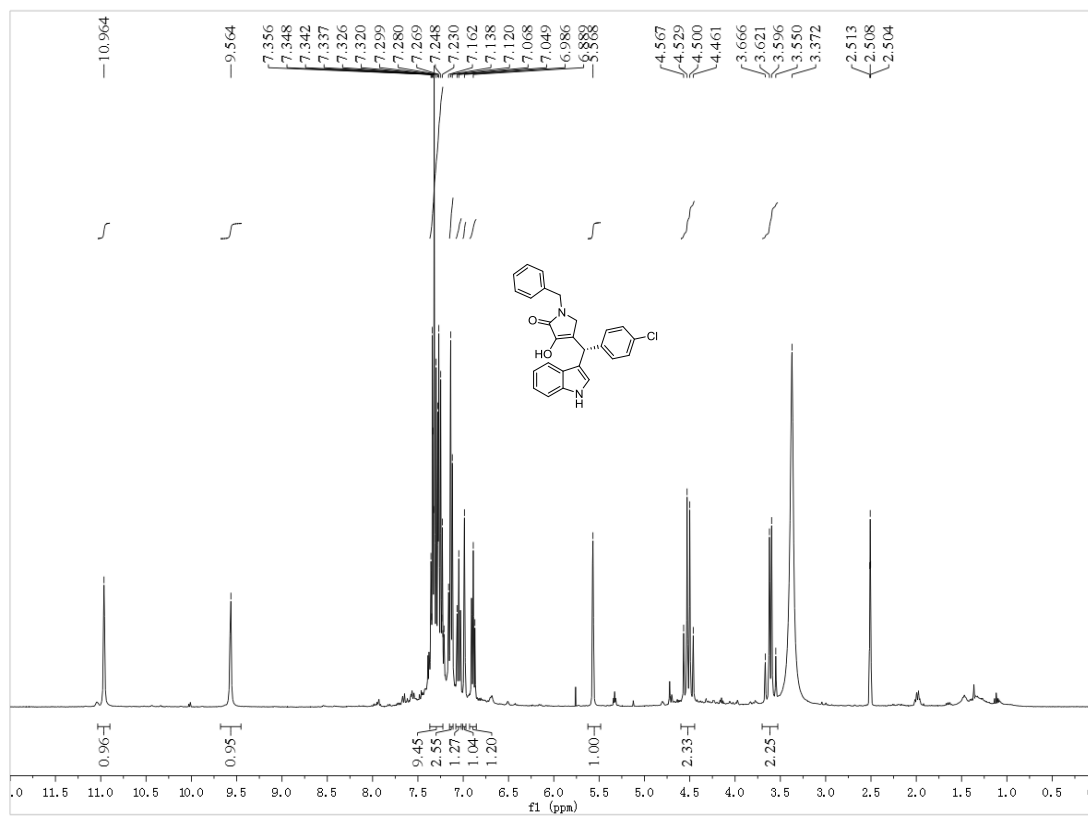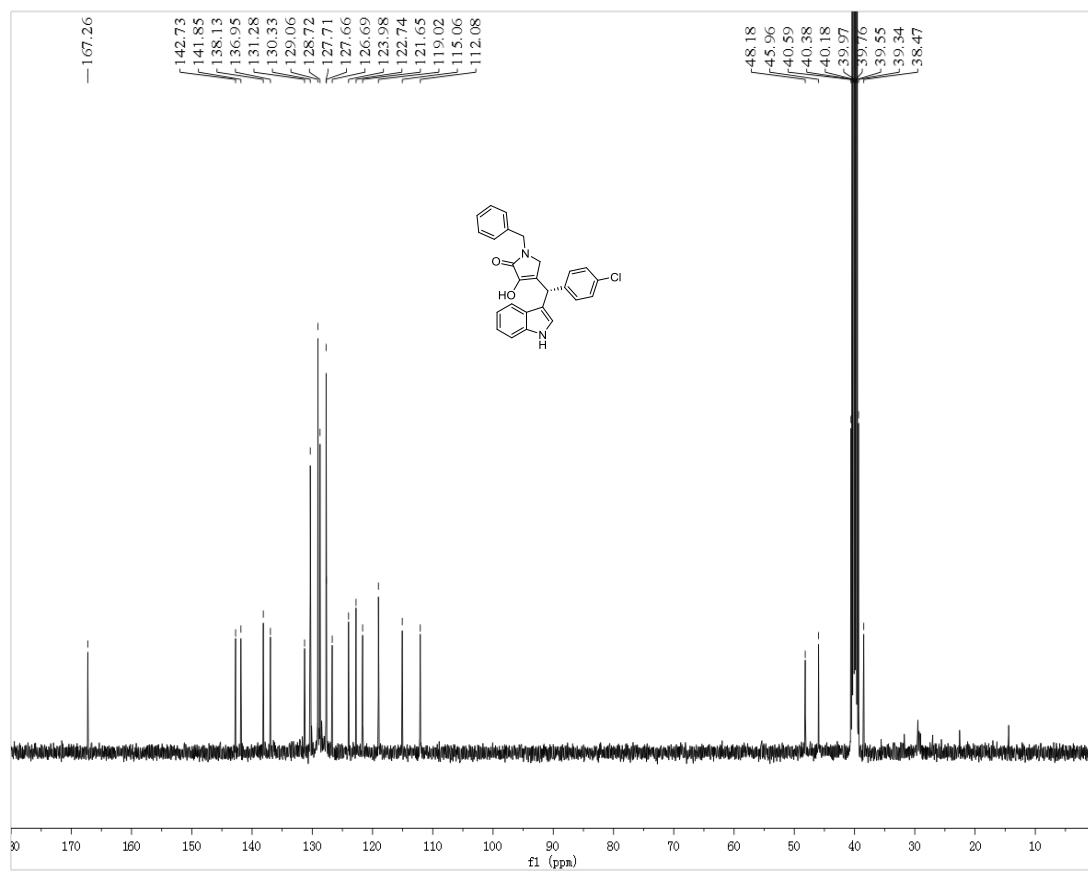

### HPLC of 6e

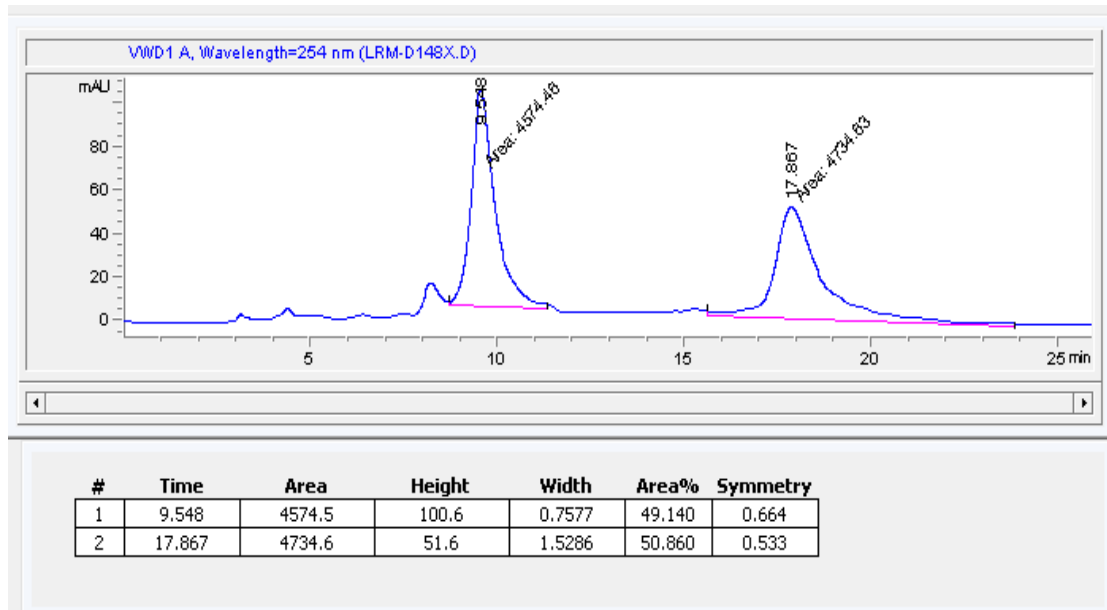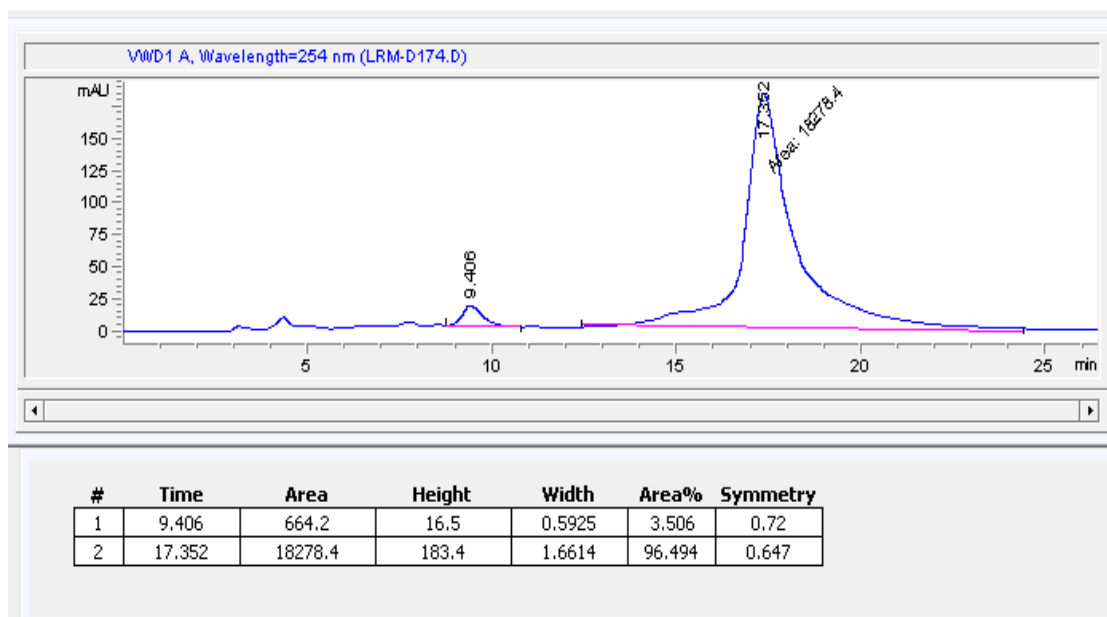

# $^1\text{H}$ and $^{13}\text{C}$ NMR of 6f

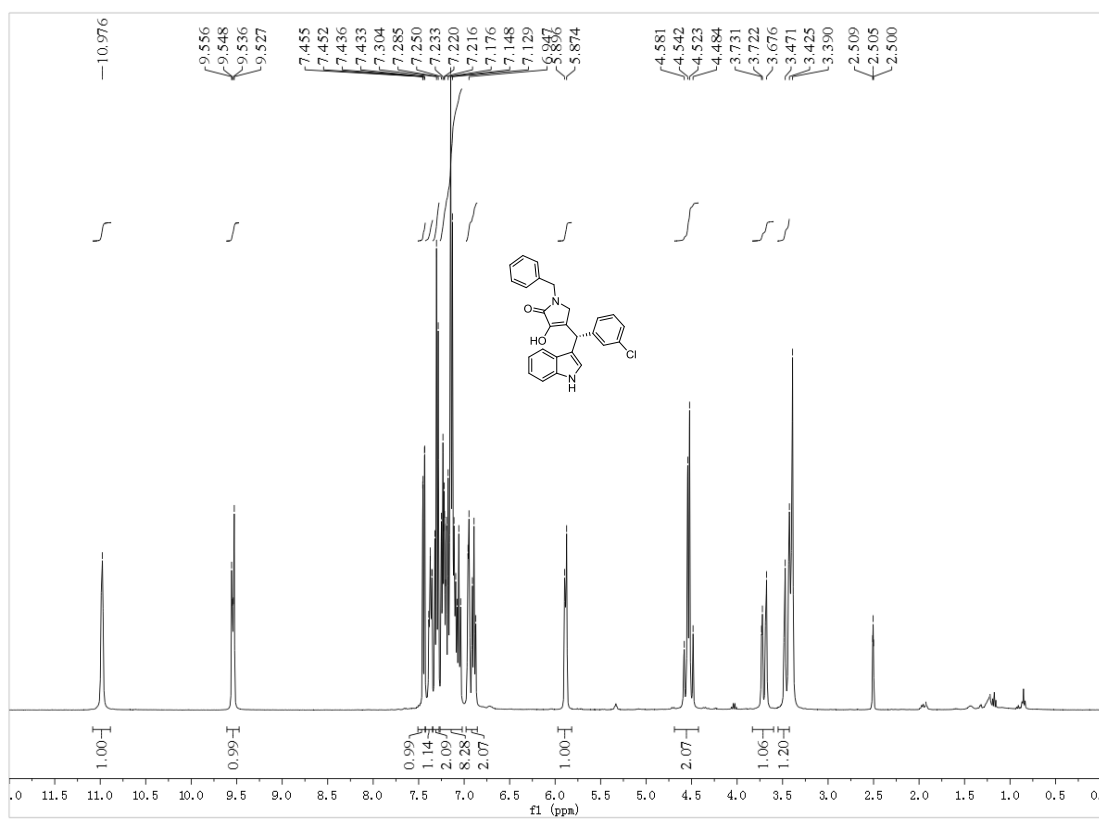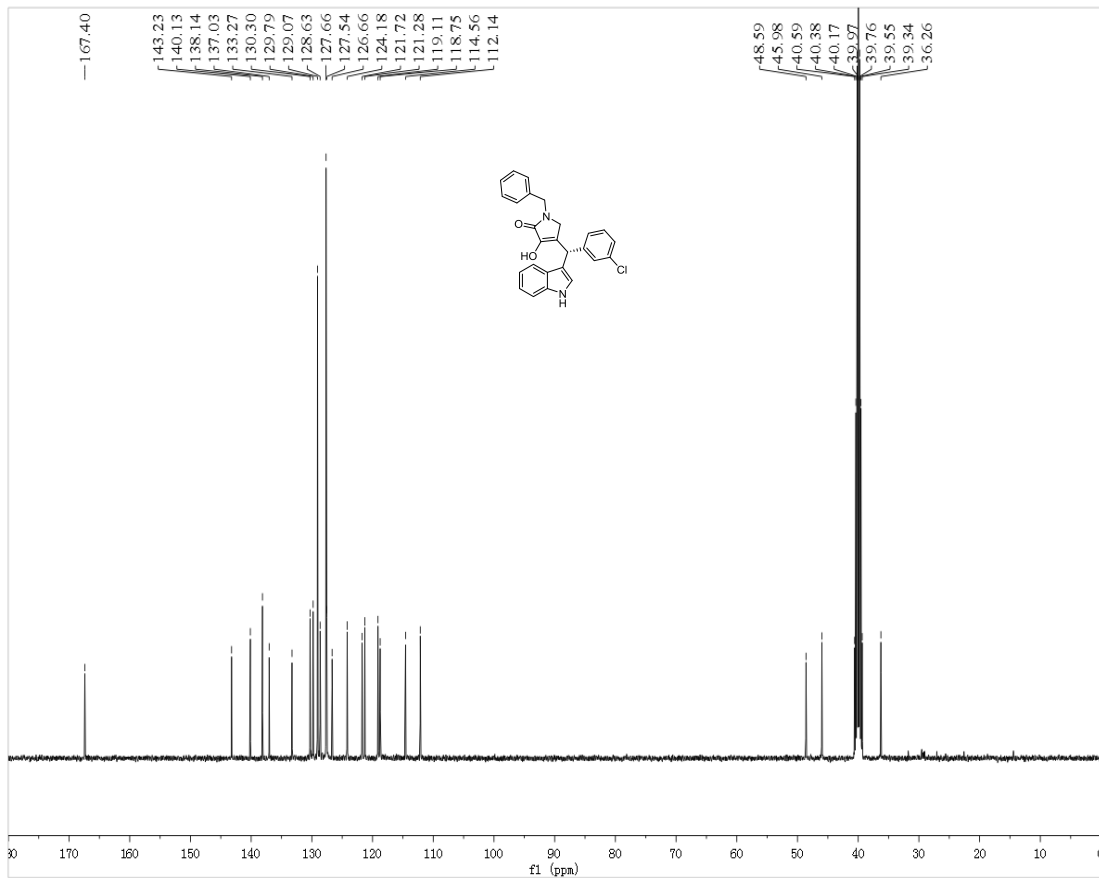

### HPLC of 6f

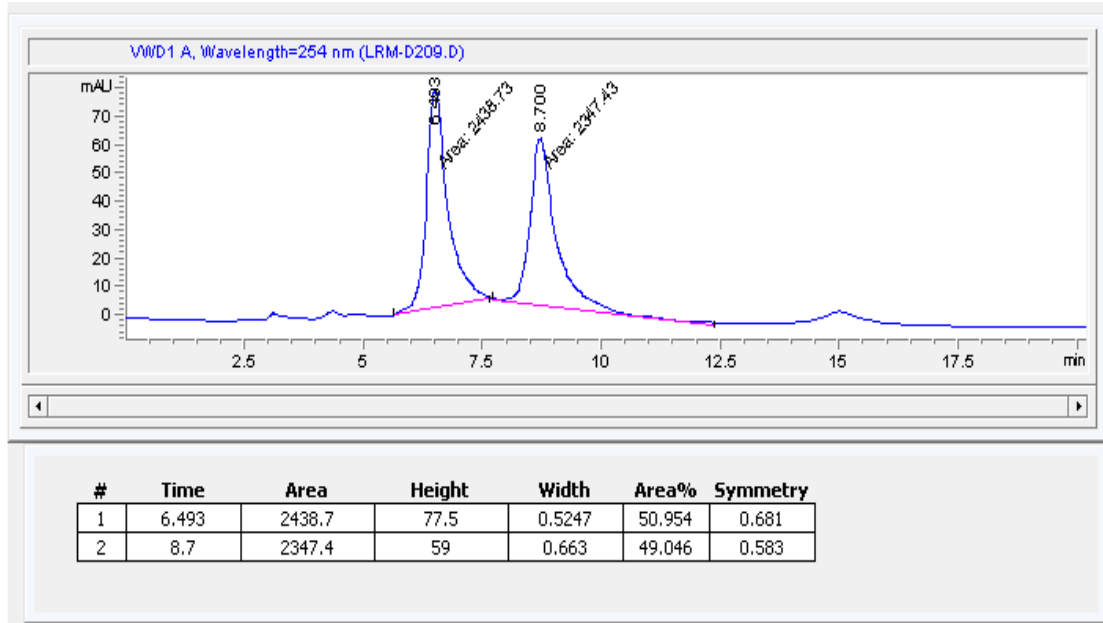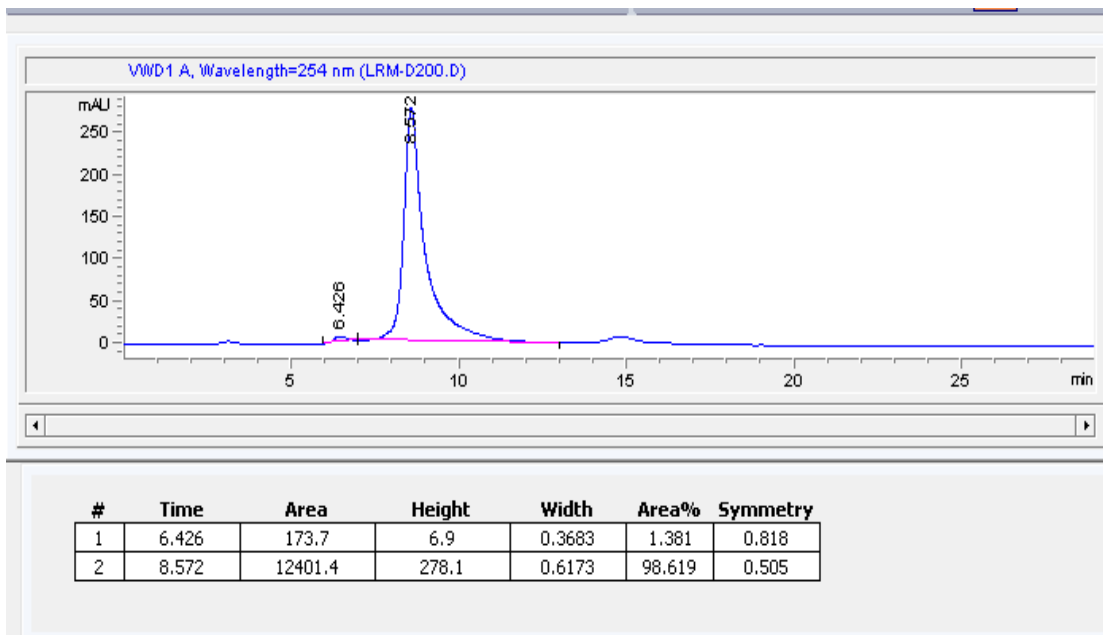

# $^1\text{H}$ and $^{13}\text{C}$ NMR of 6g

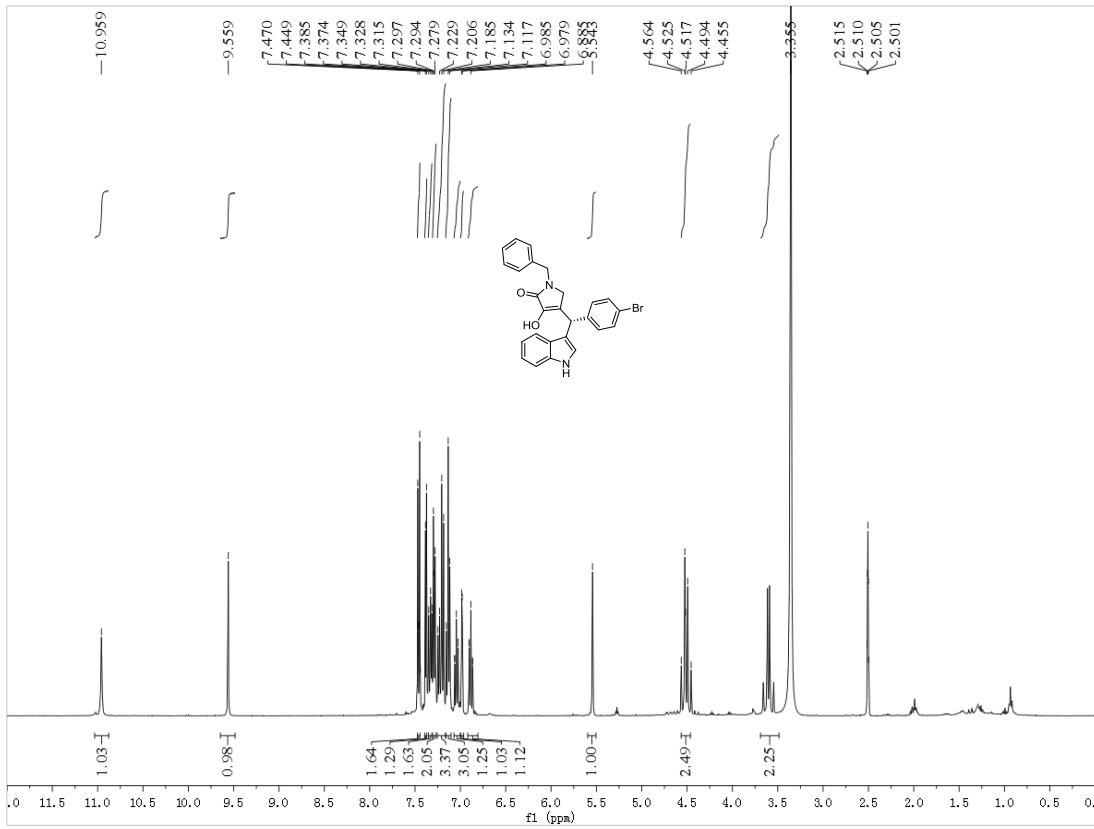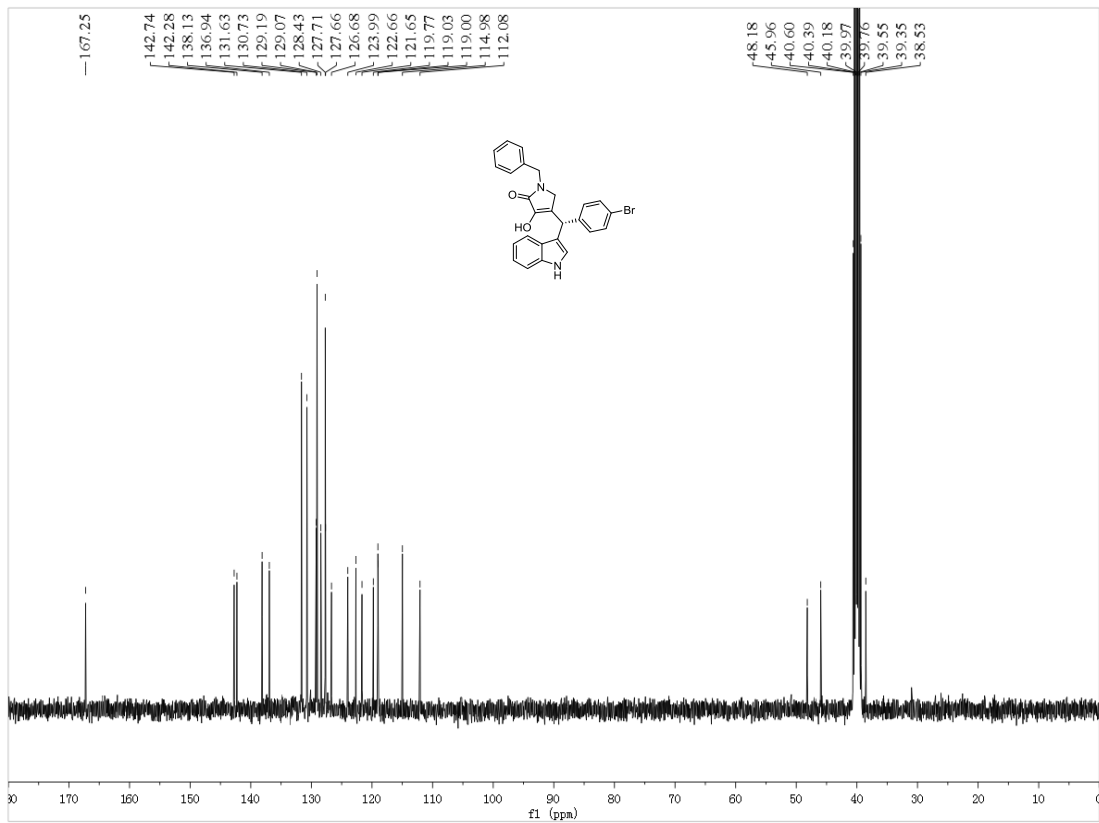

### HPLC of 6g

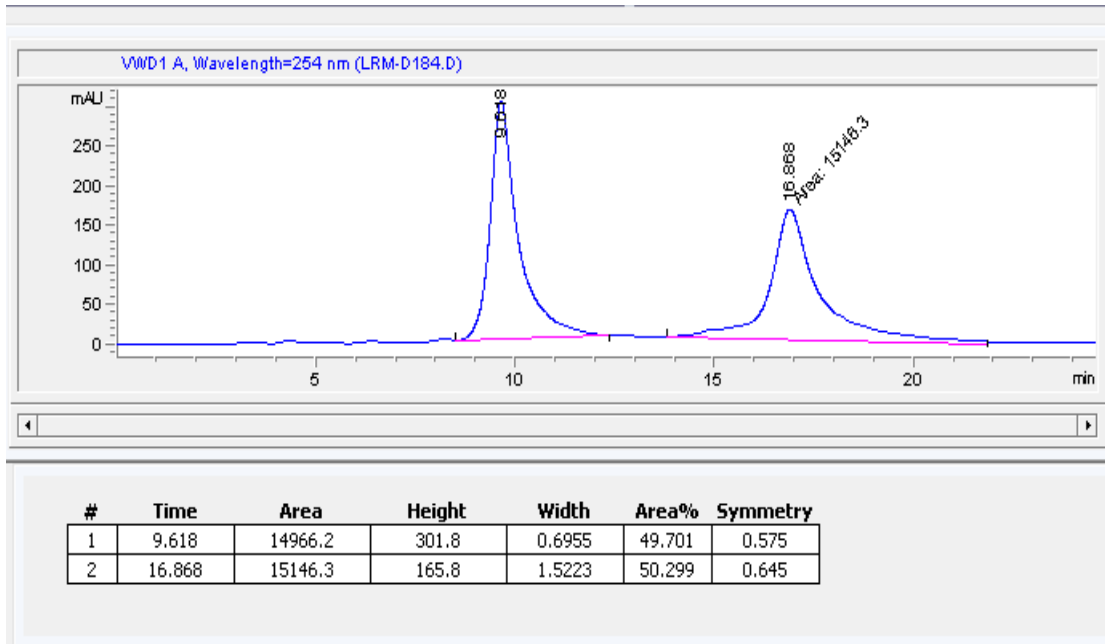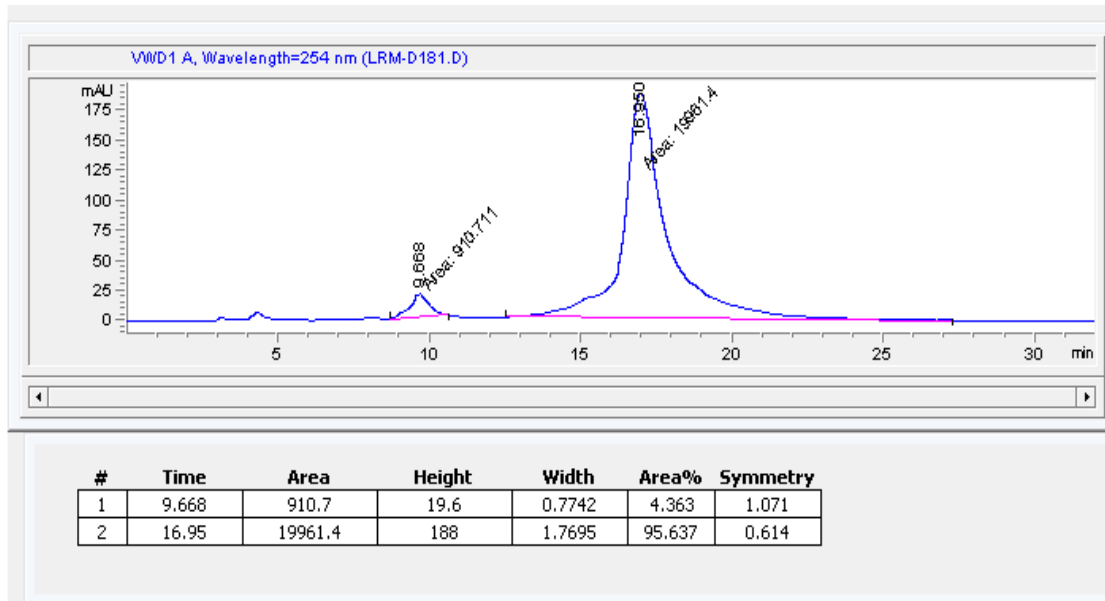

# $^1\text{H}$ and $^{13}\text{C}$ NMR of 6h

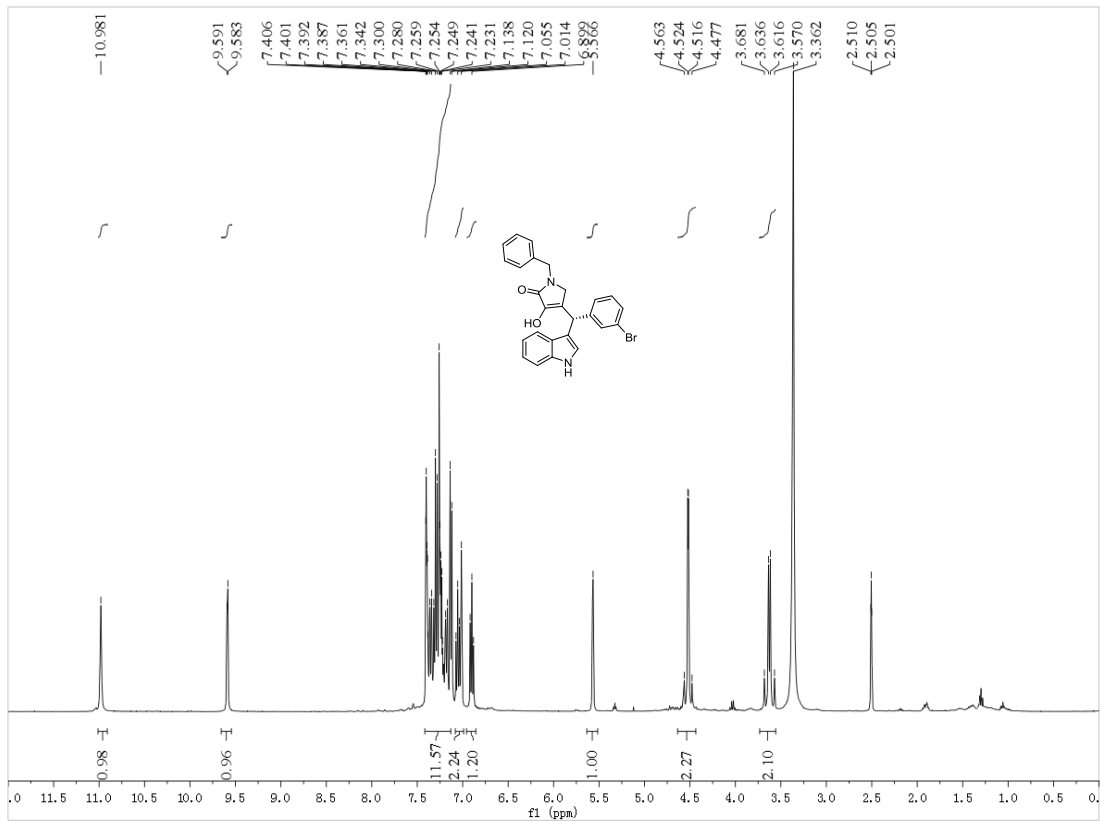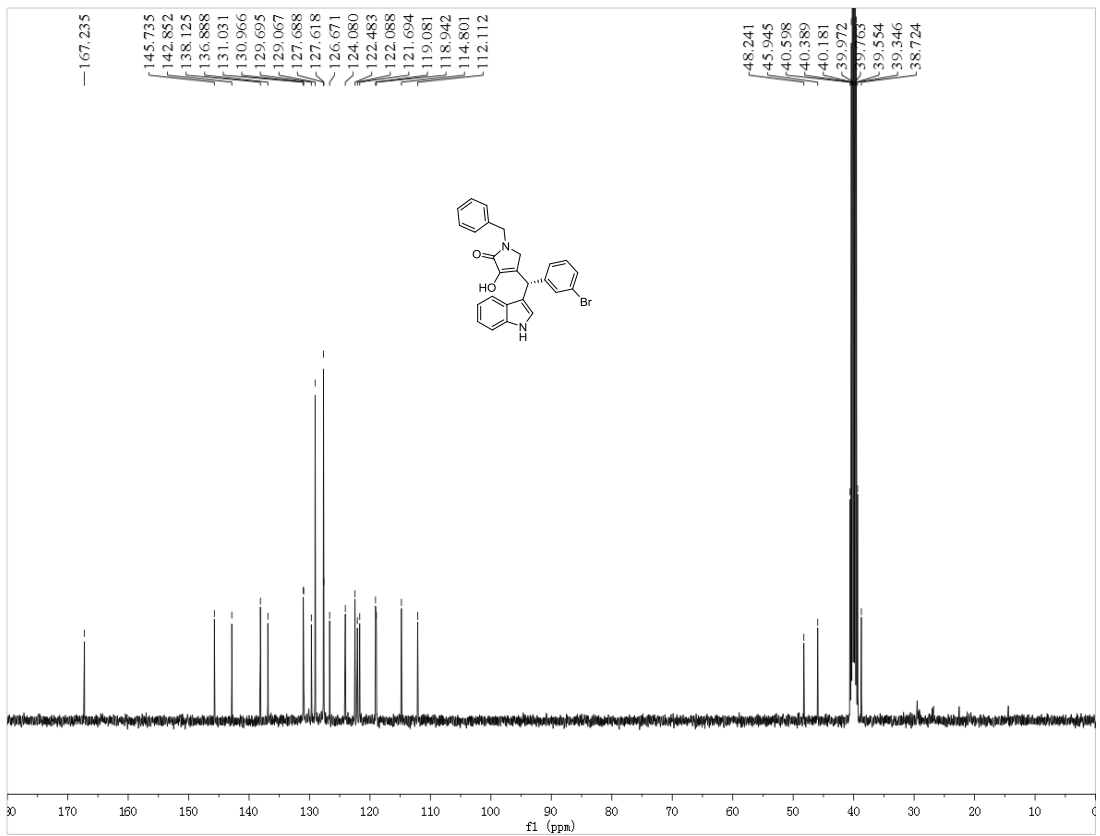



### HPLC of 6h

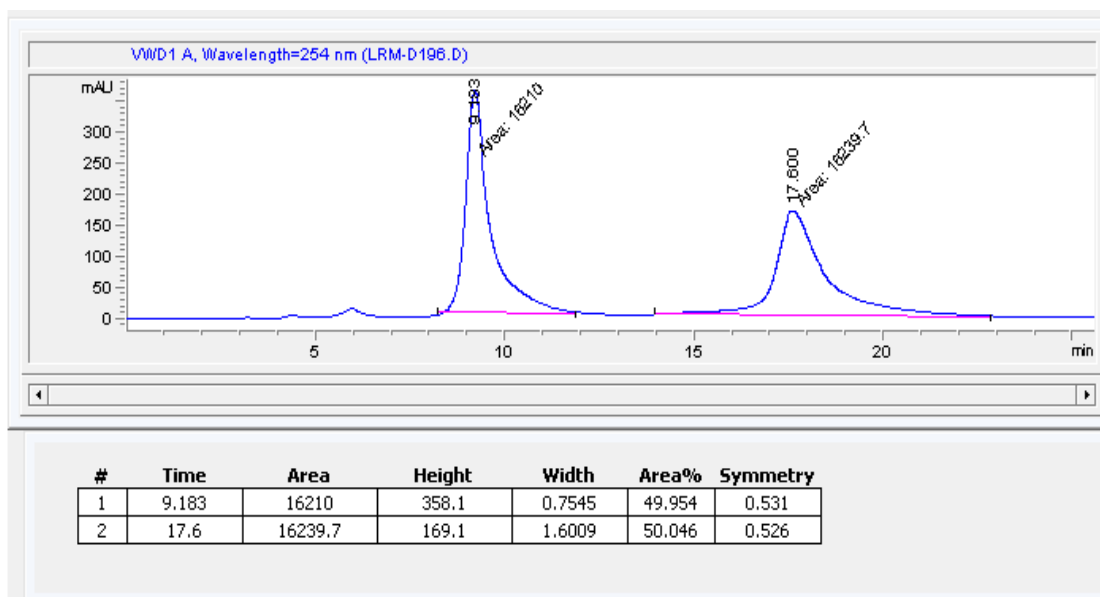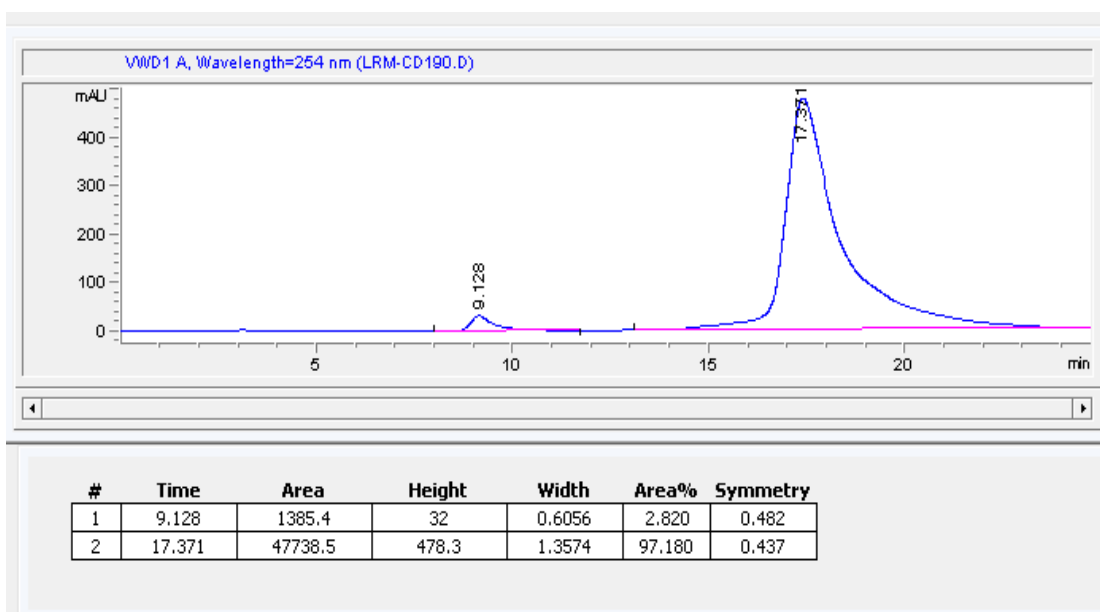

<sup>1</sup>H and <sup>13</sup>C NMR of 6i

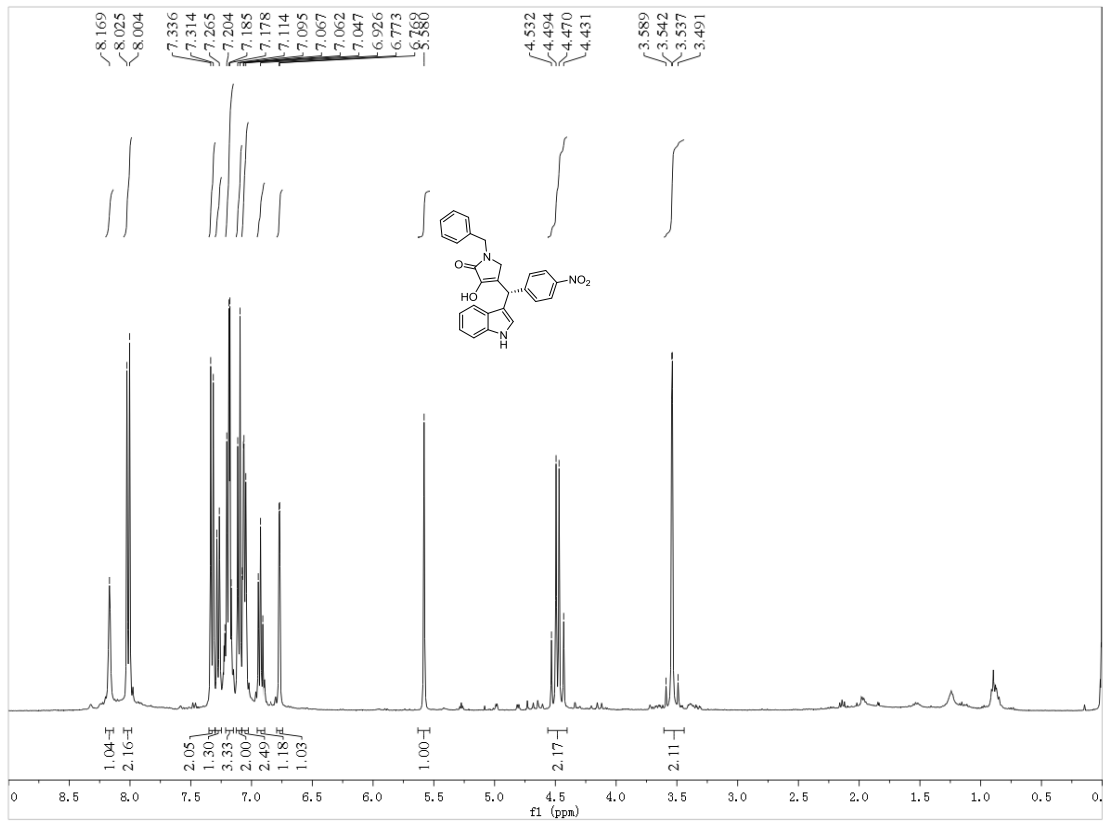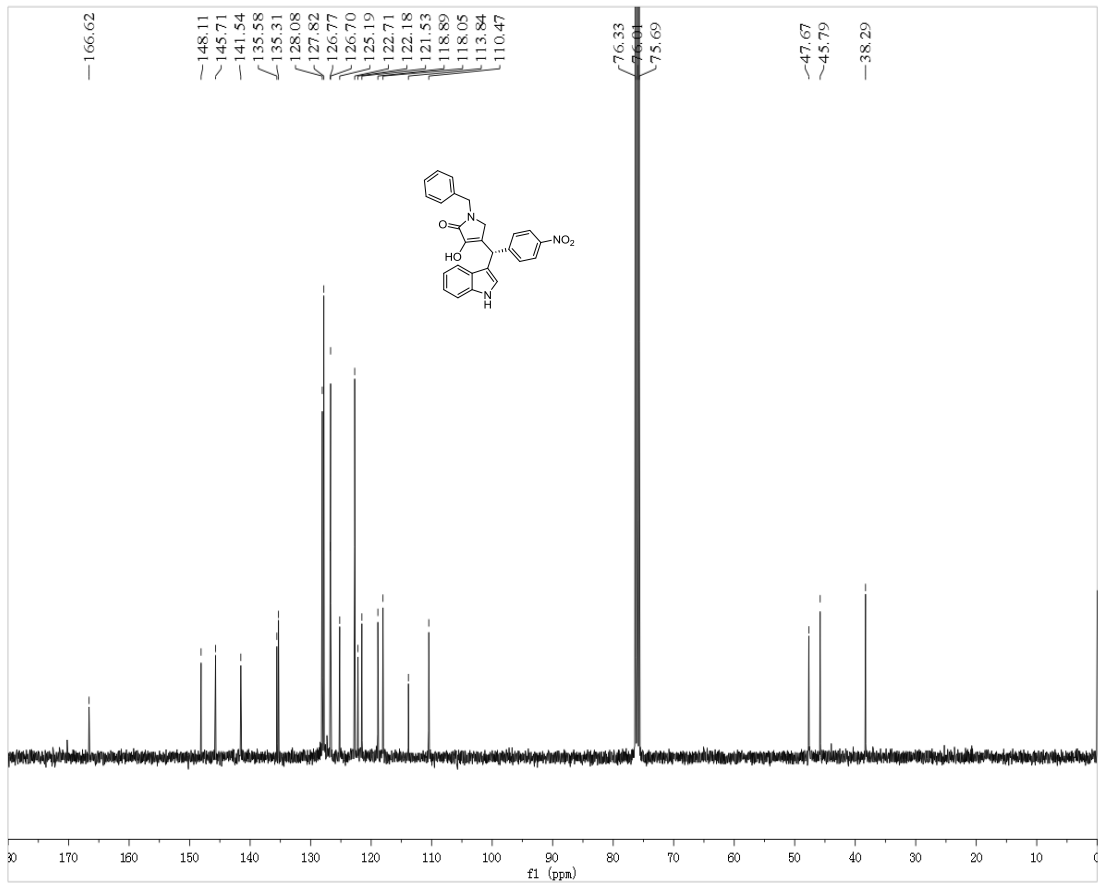

### HPLC of 6i

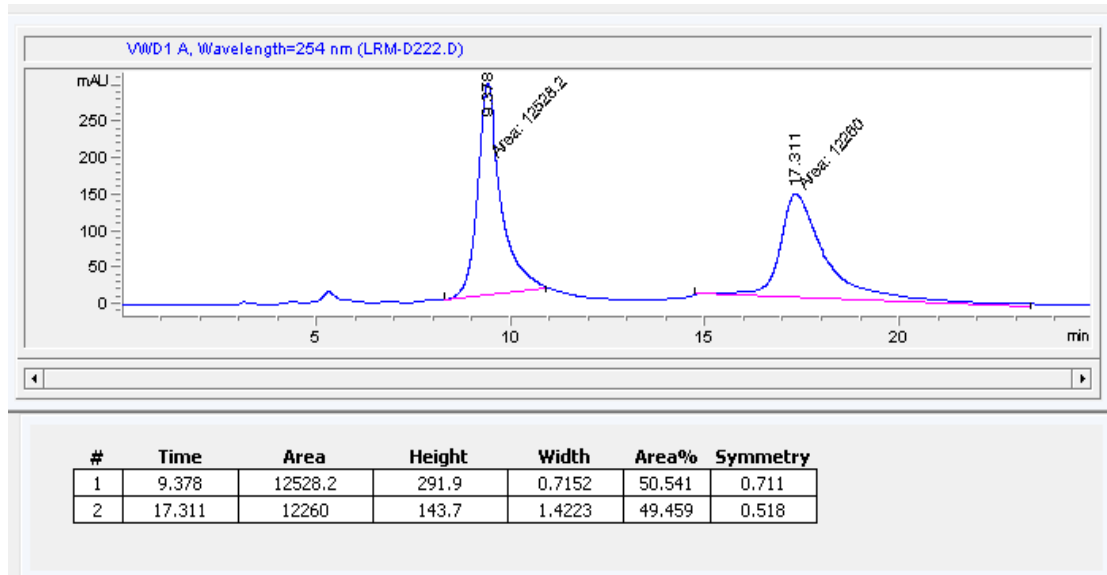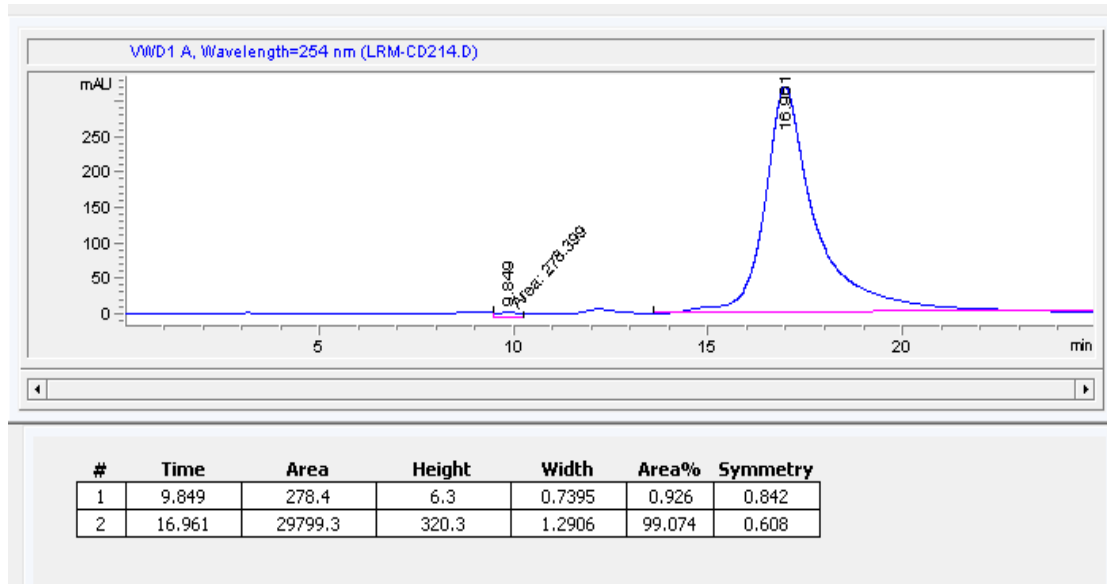

# <sup>1</sup>H and <sup>13</sup>C NMR of 6j

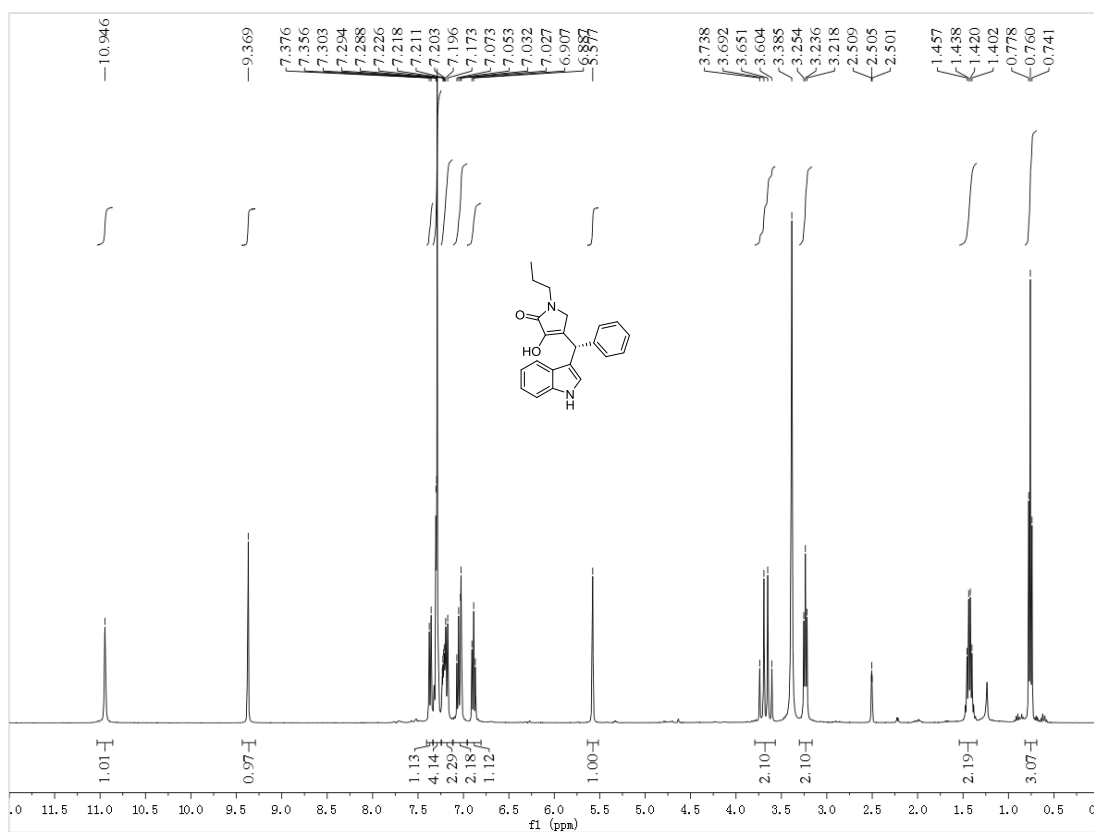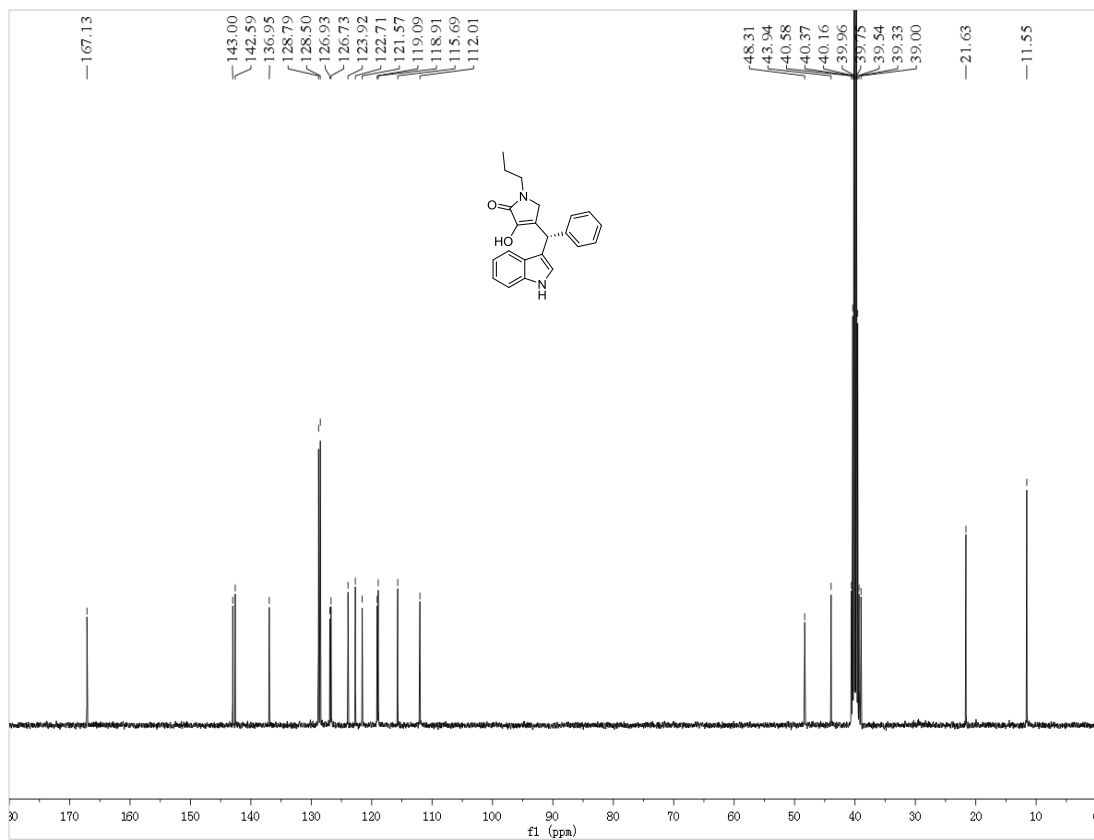

### HPLC of 6j

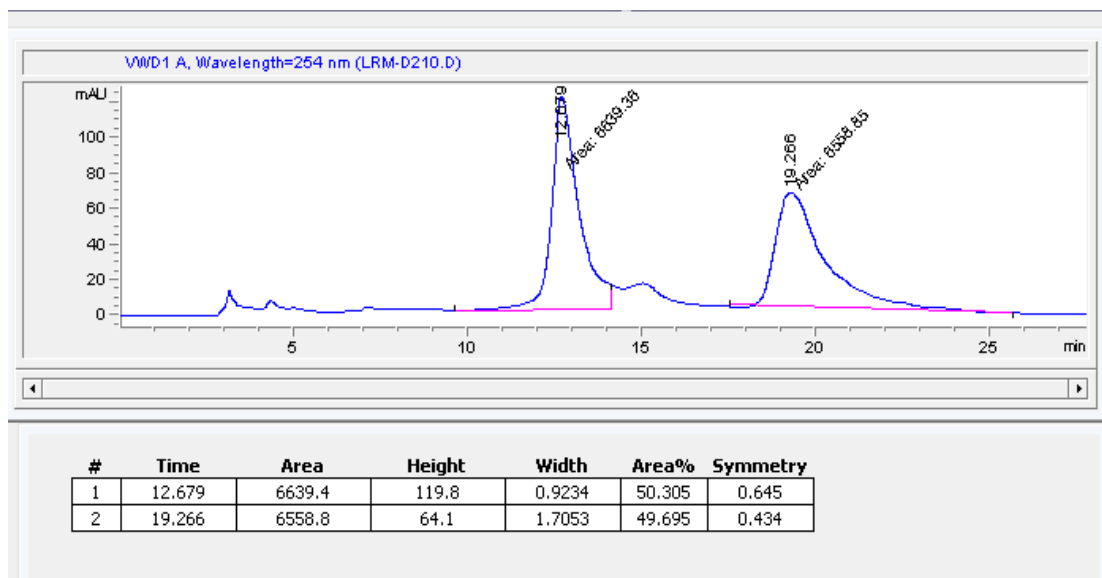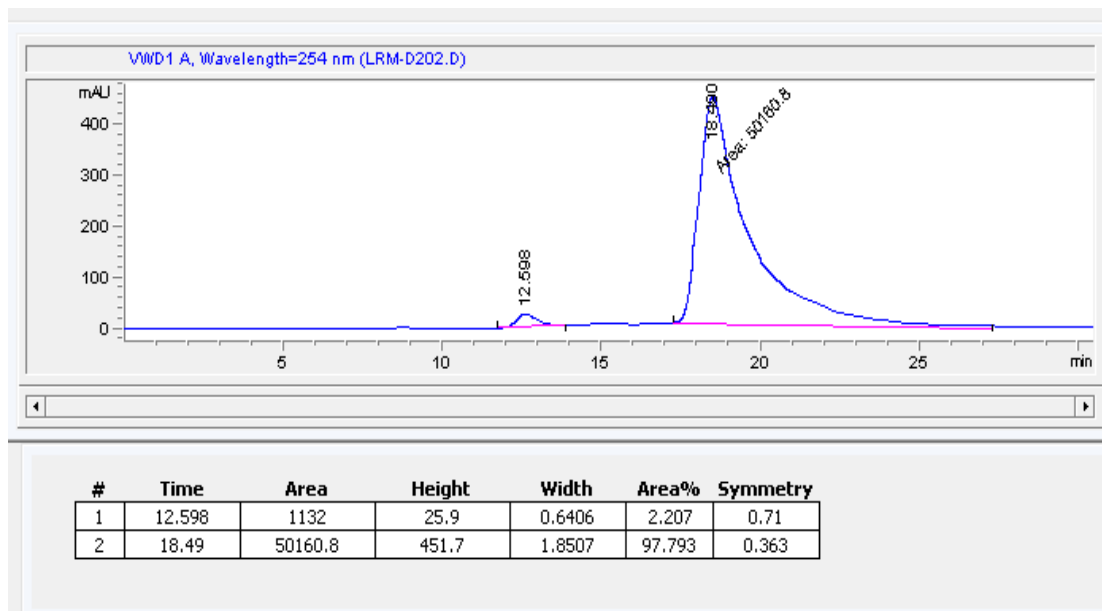

# $^1\text{H}$ and $^{13}\text{C}$ NMR of 6k

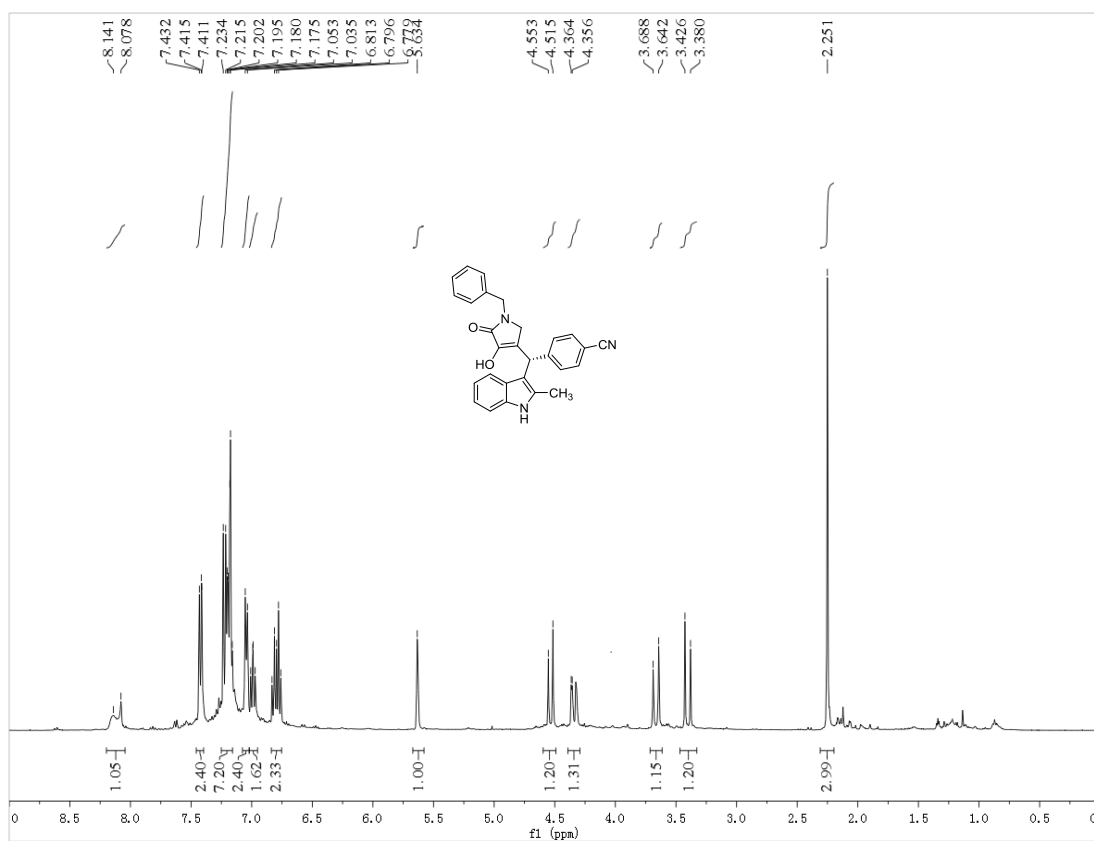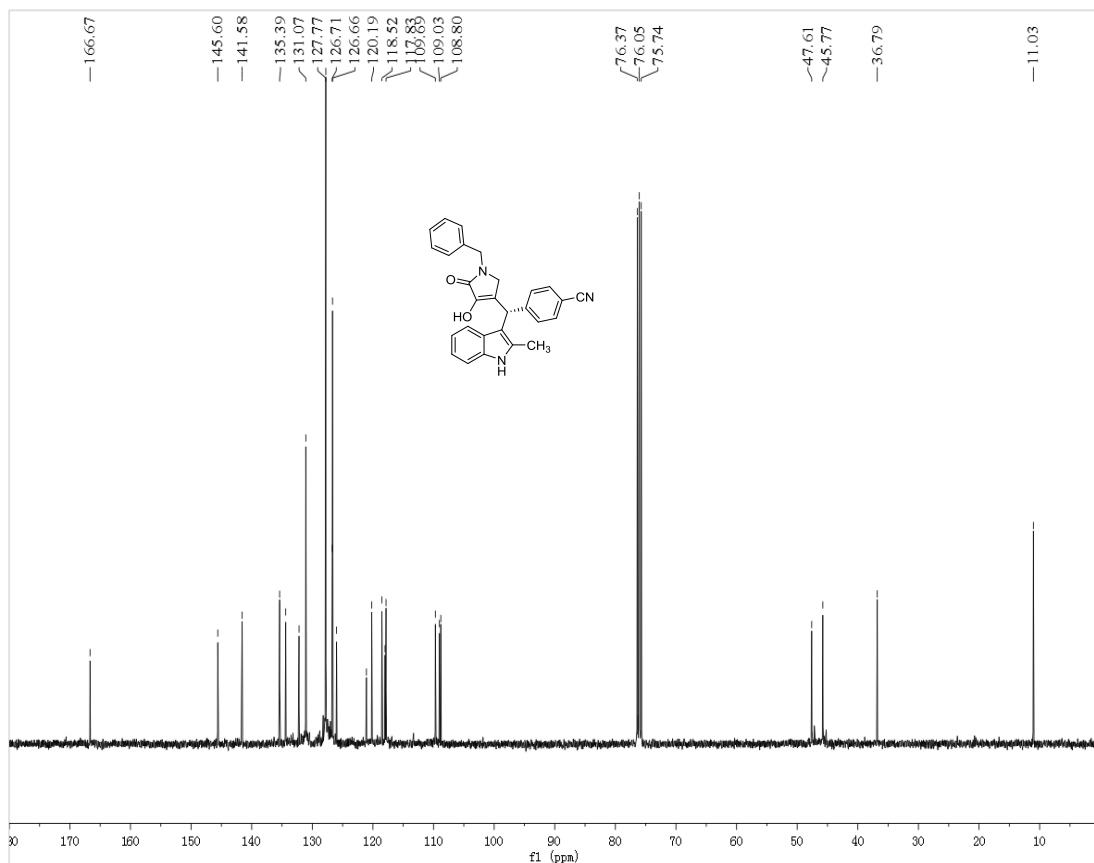

### HPLC of 6k

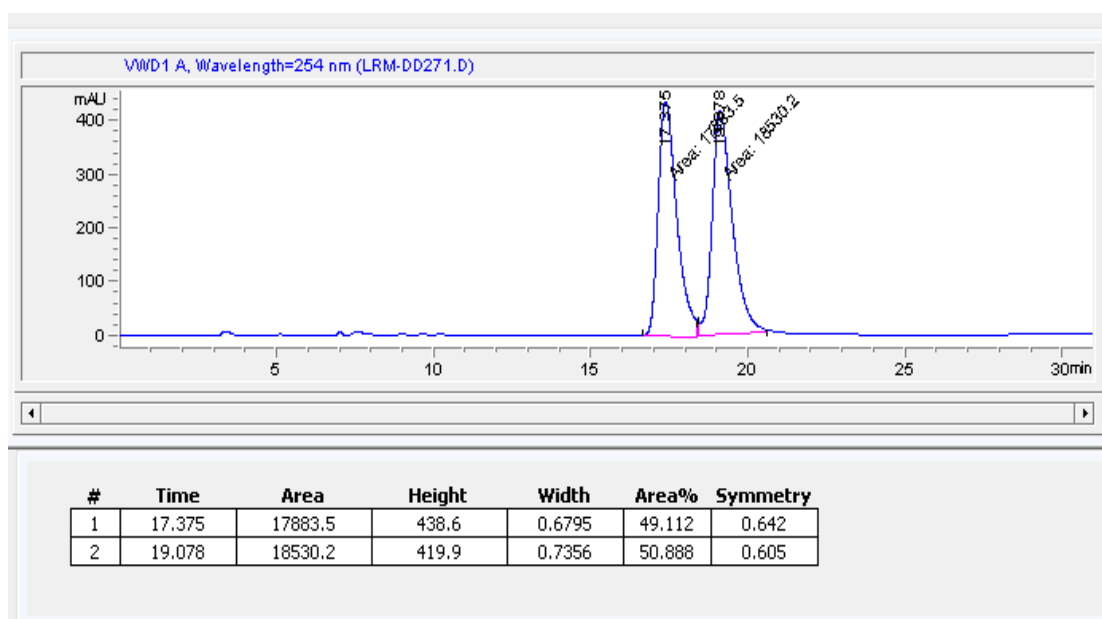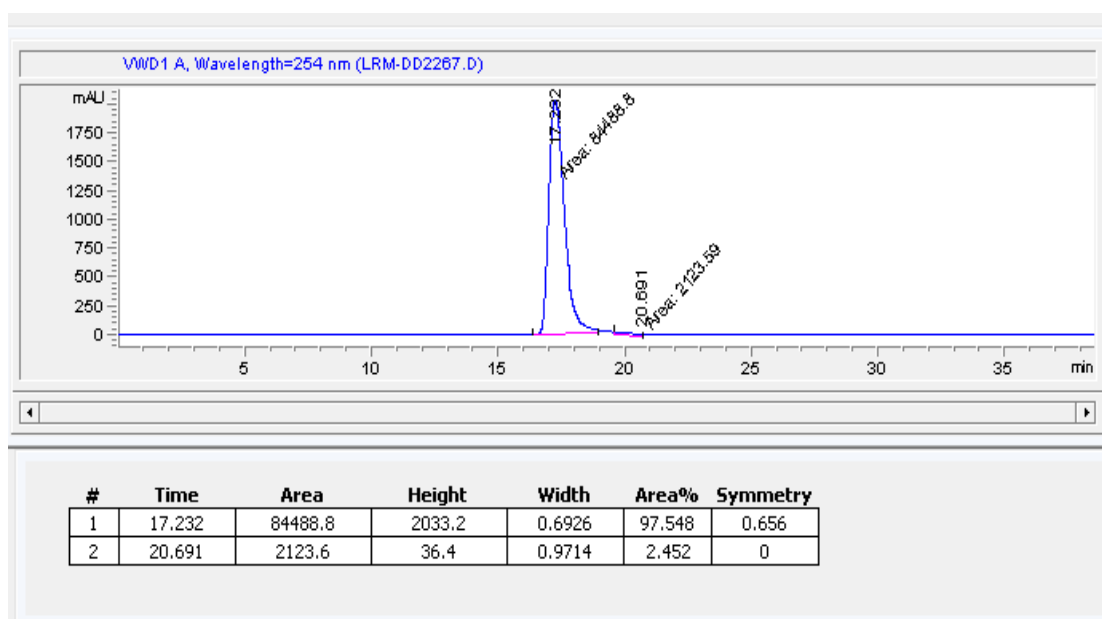

# $^1\text{H}$ and $^{13}\text{C}$ NMR of 6l

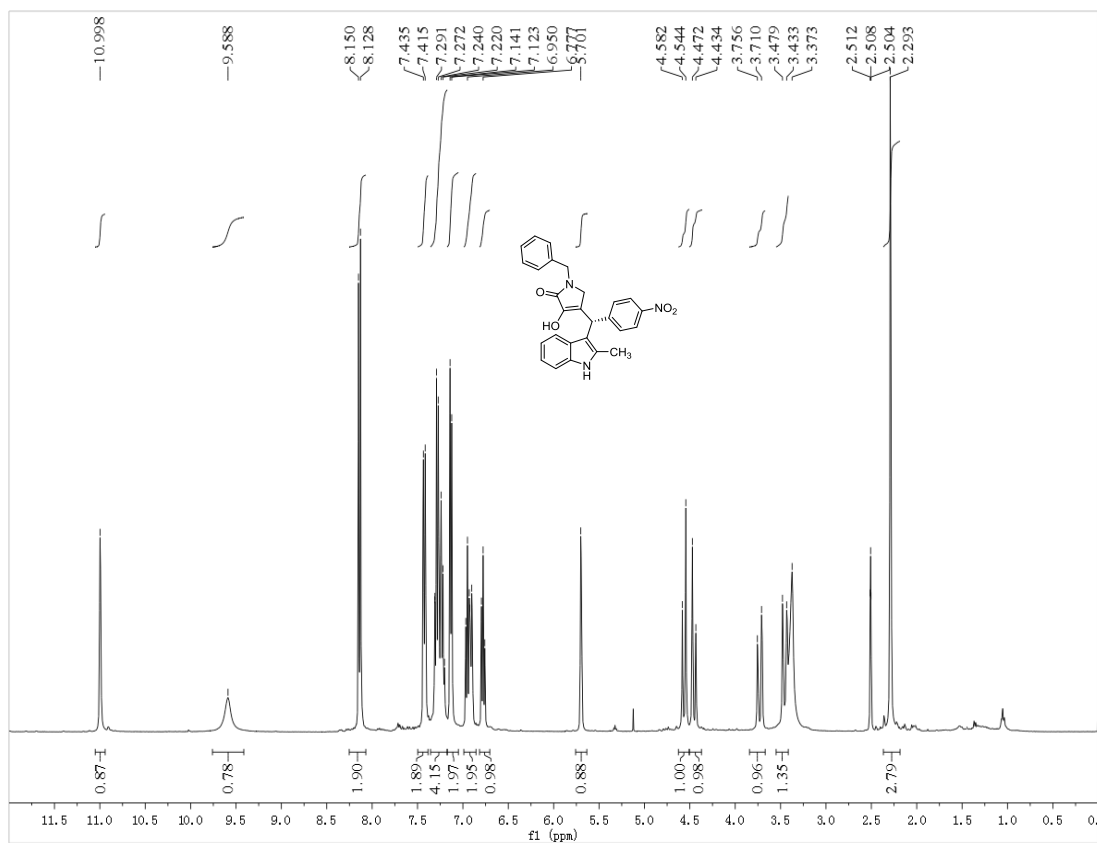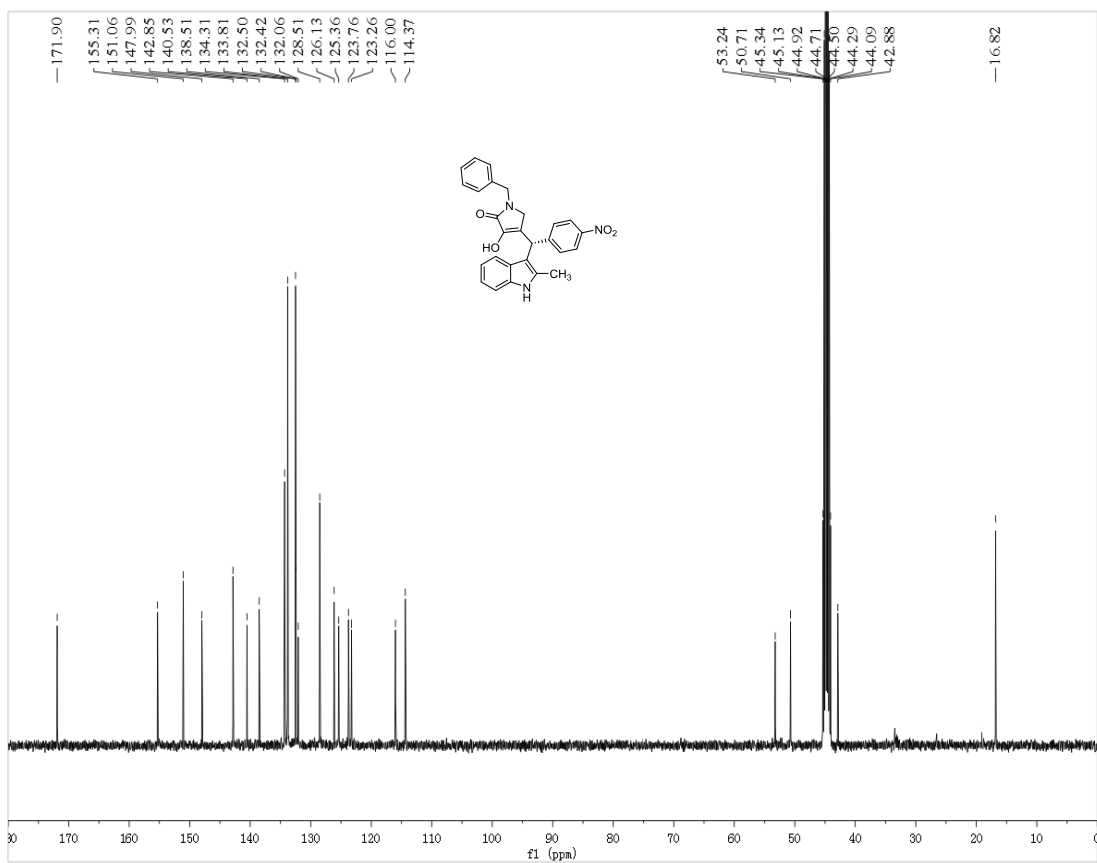



# HPLC of 6l

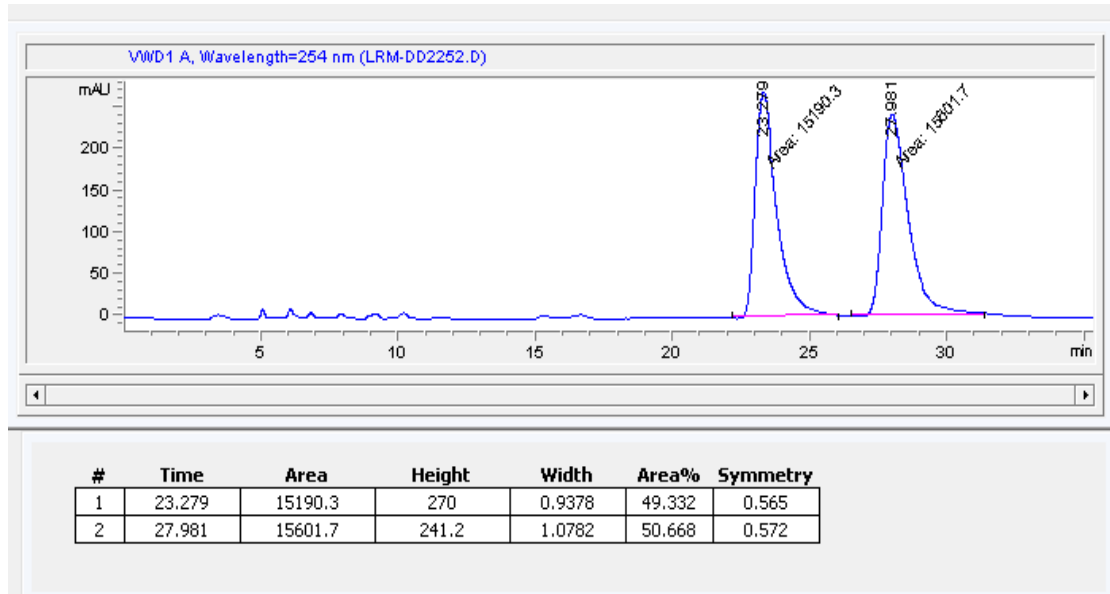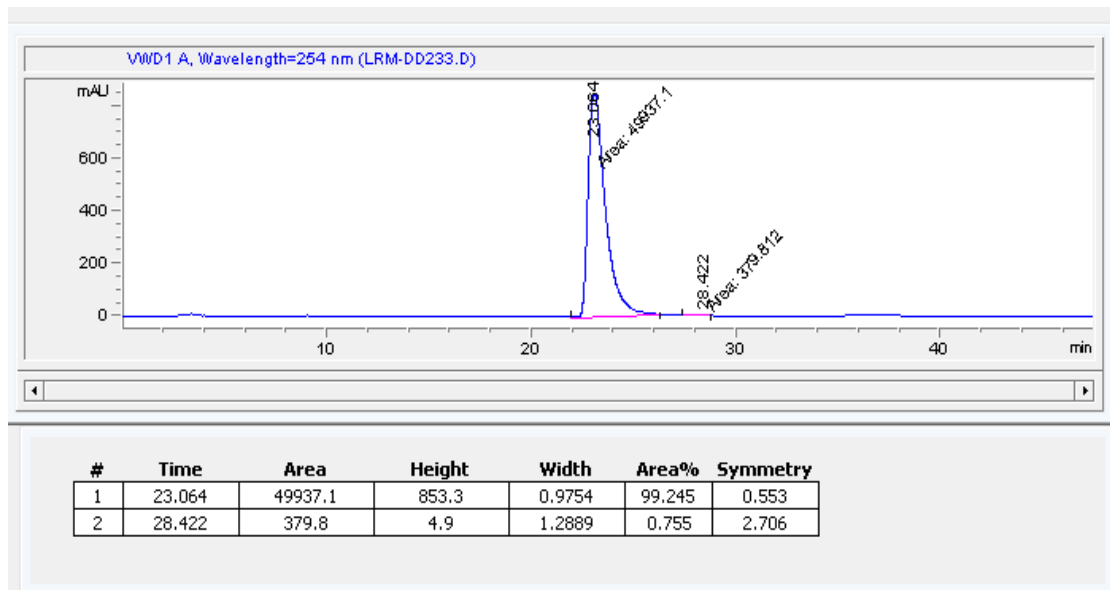

# $^1\text{H}$ and $^{13}\text{C}$ NMR of 6m

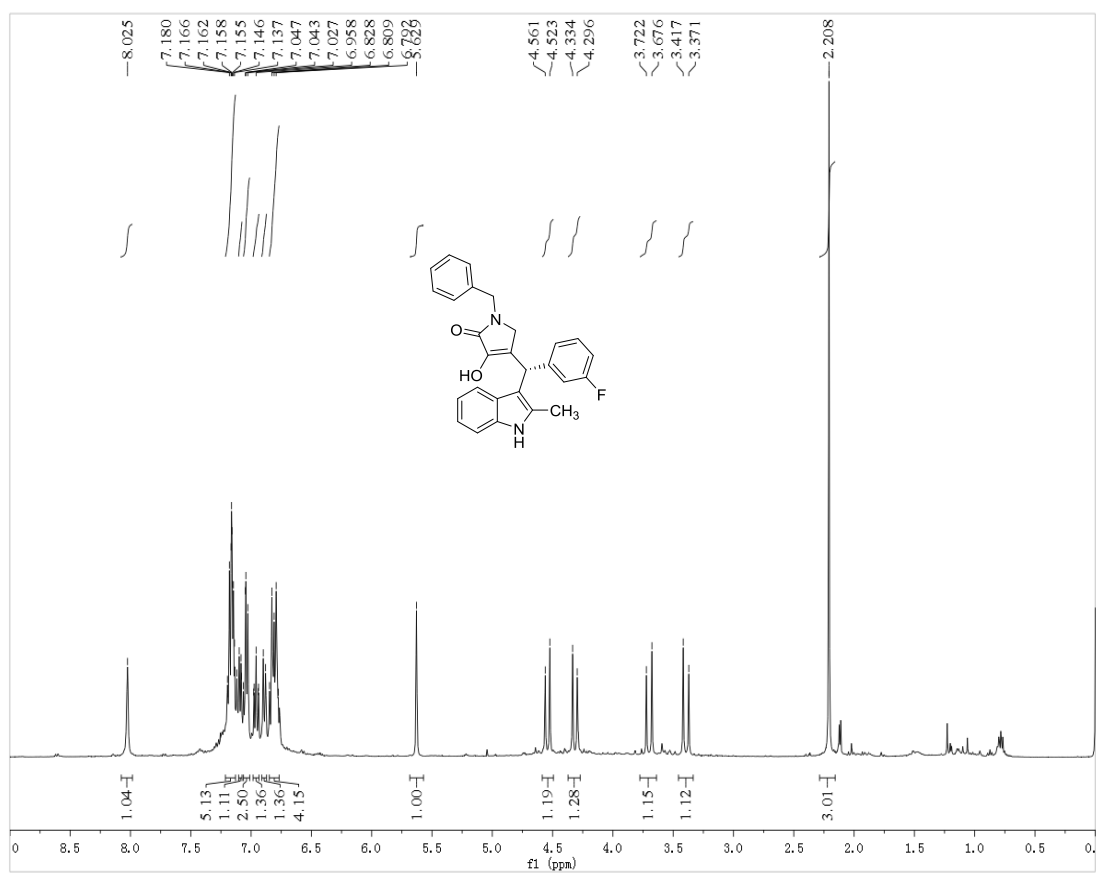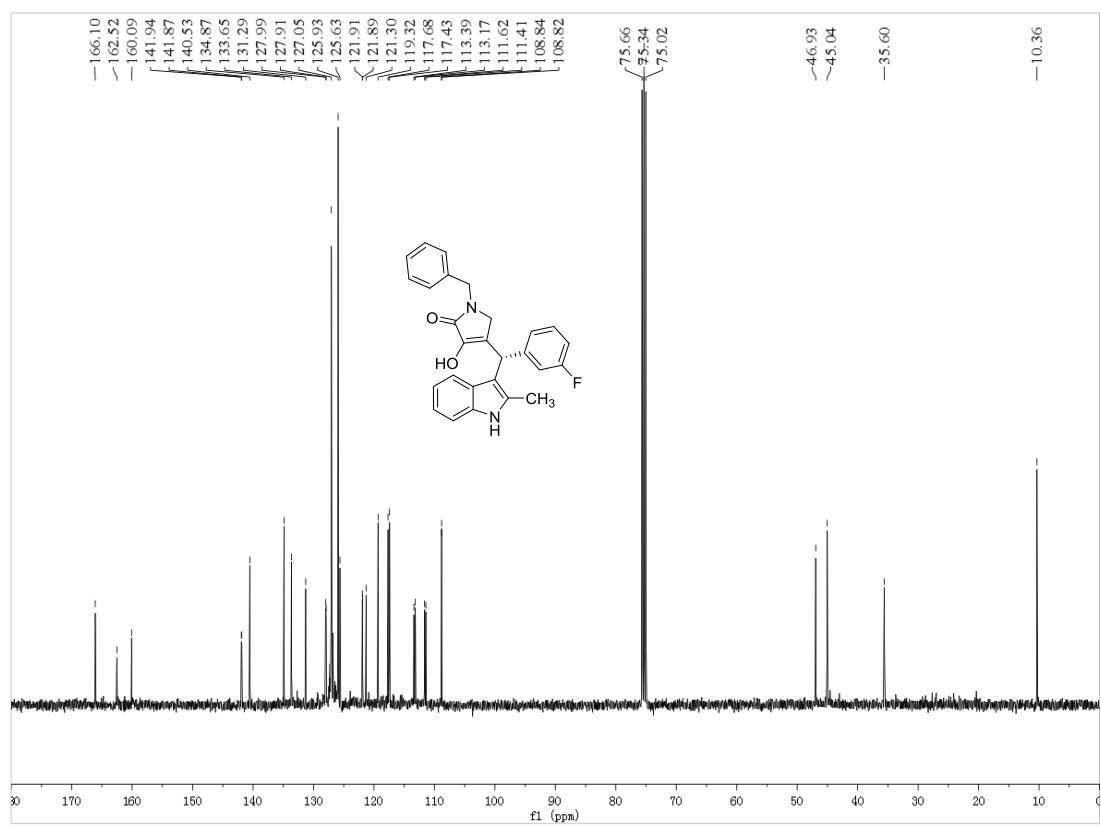

## HPLC of 6m

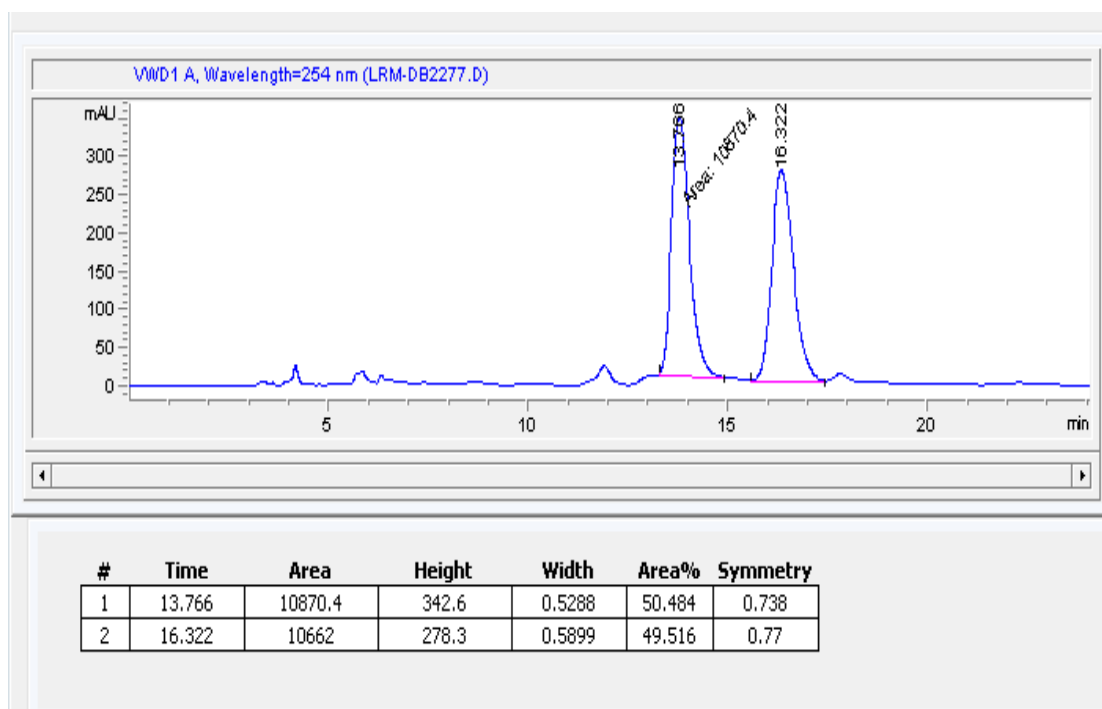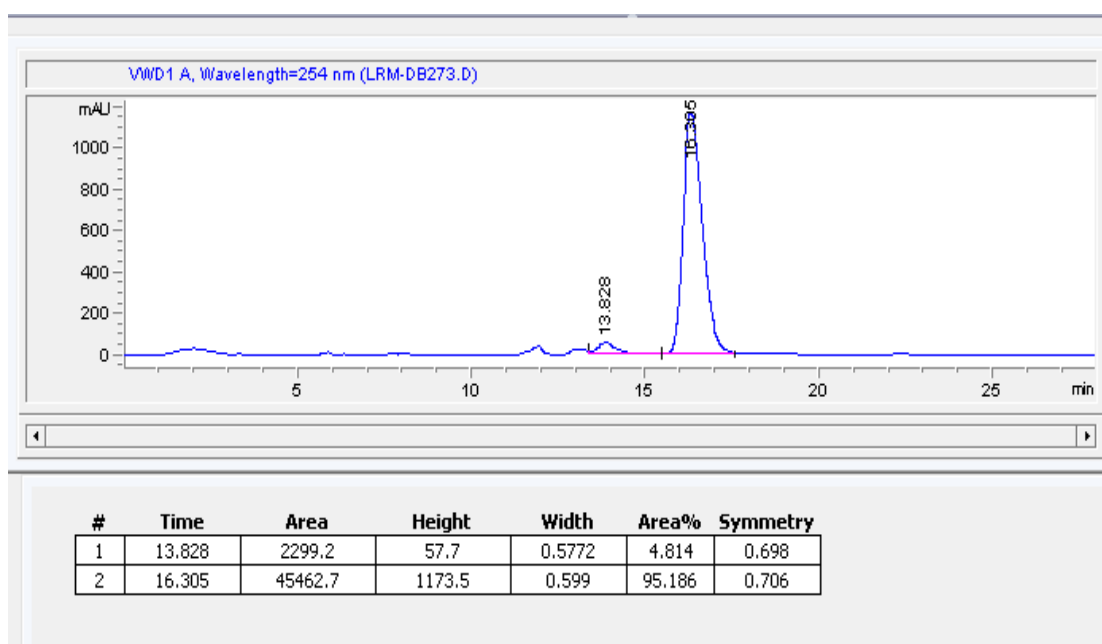

# <sup>1</sup>H and <sup>13</sup>C NMR of 6n

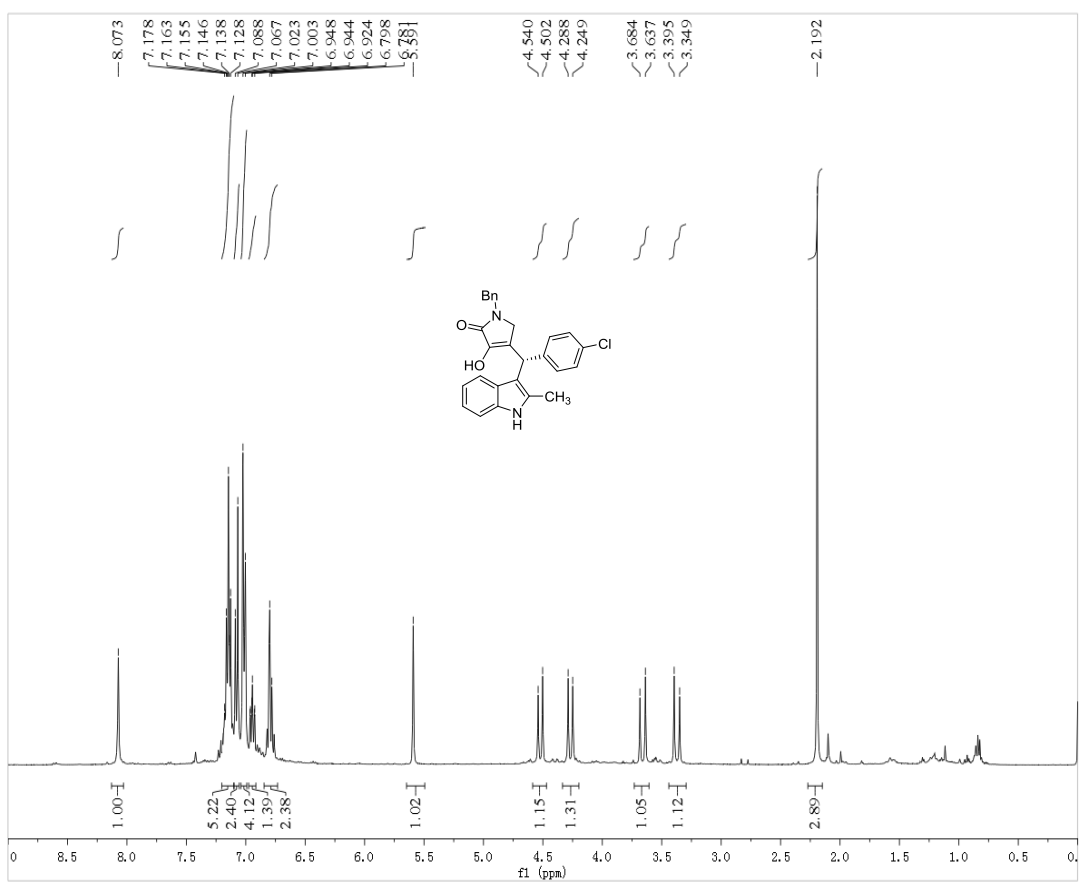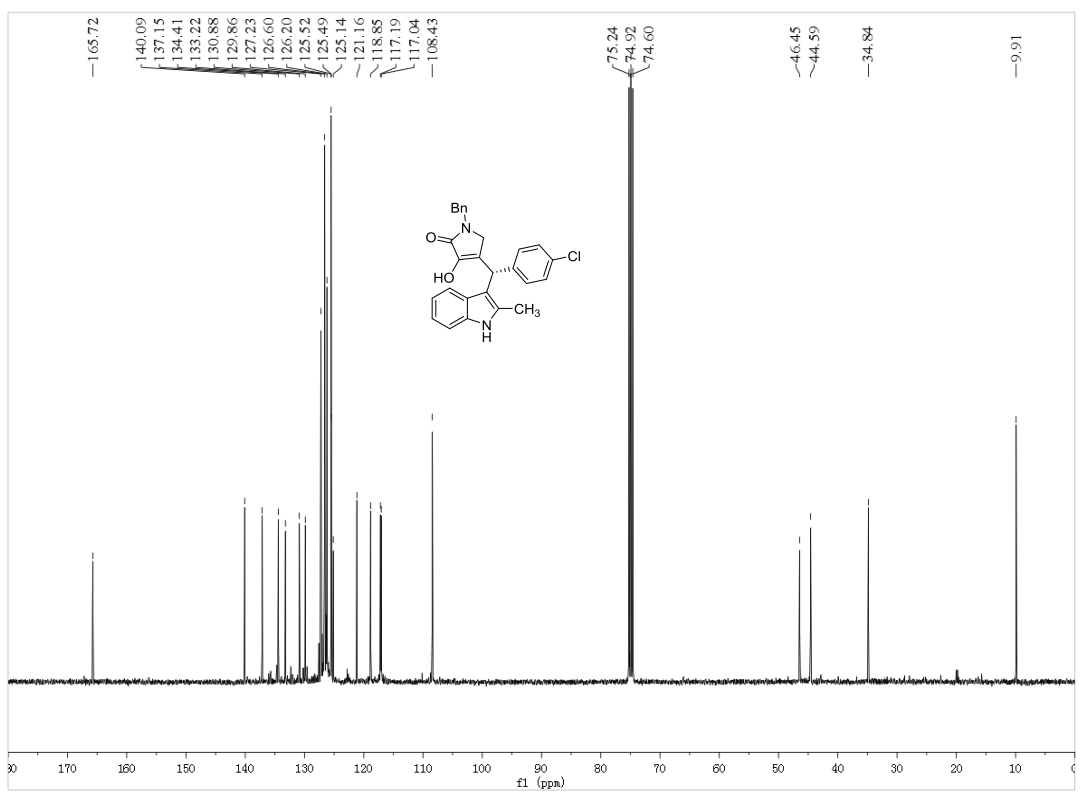

## HPLC of 6n

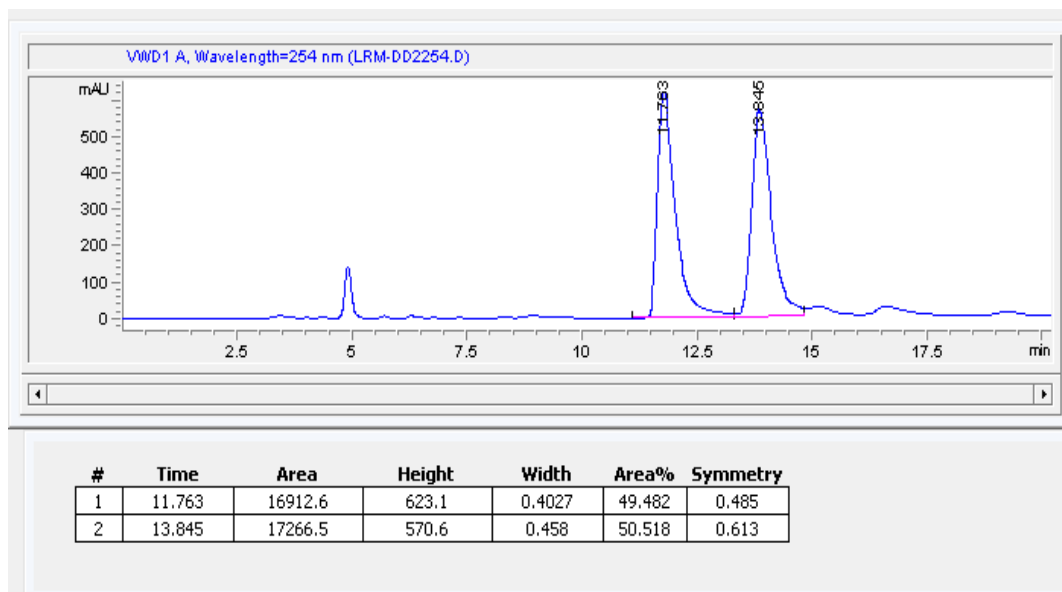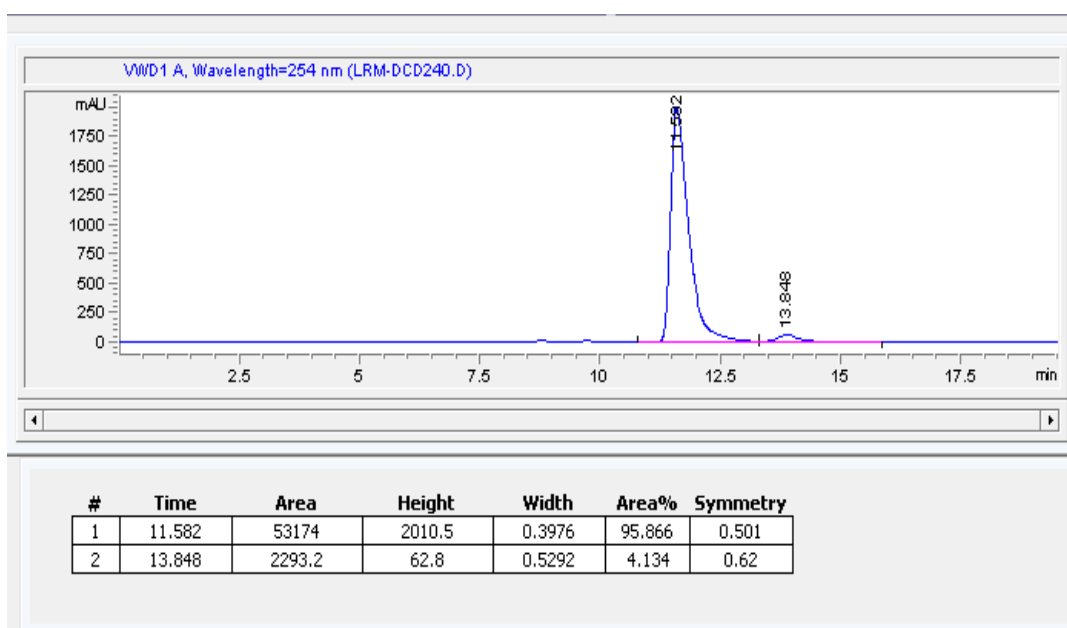

# $^1\text{H}$ and $^{13}\text{C}$ NMR of 60

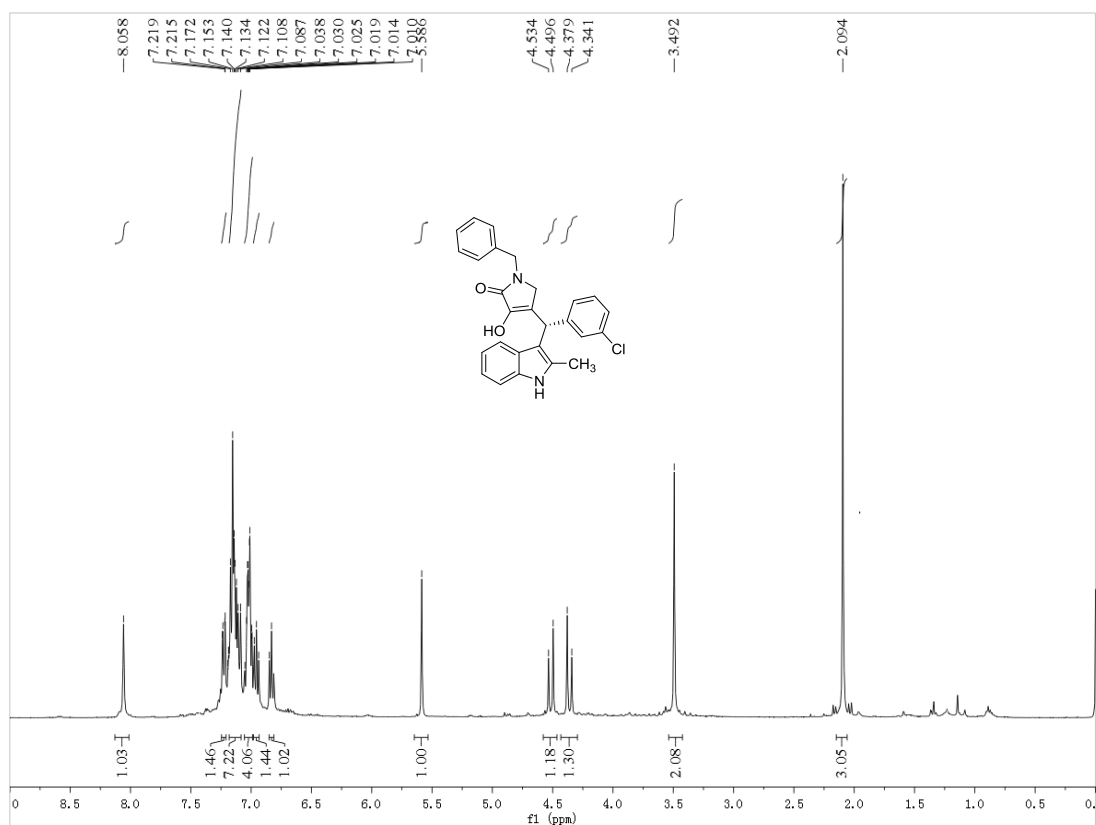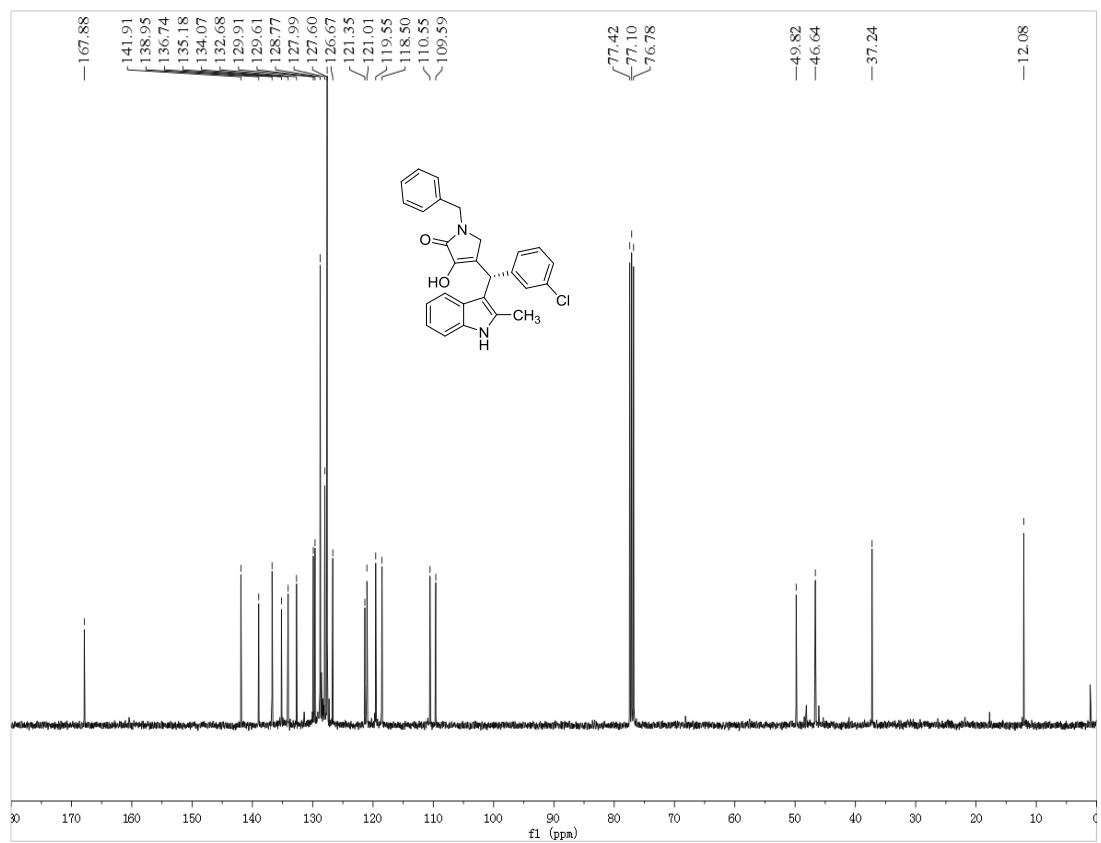

# HPLC of 60

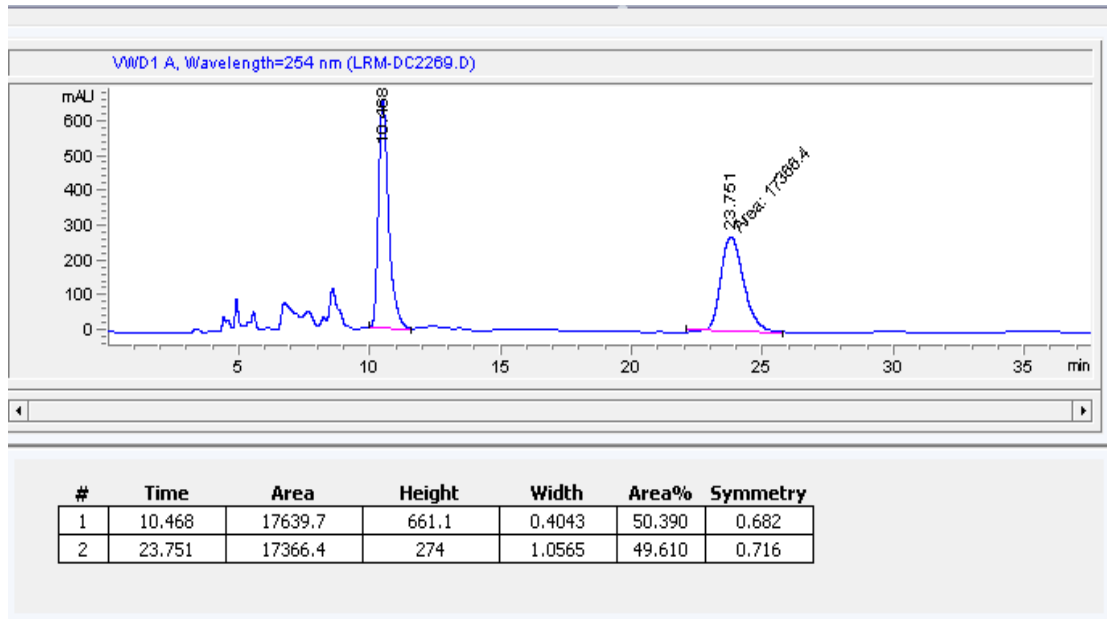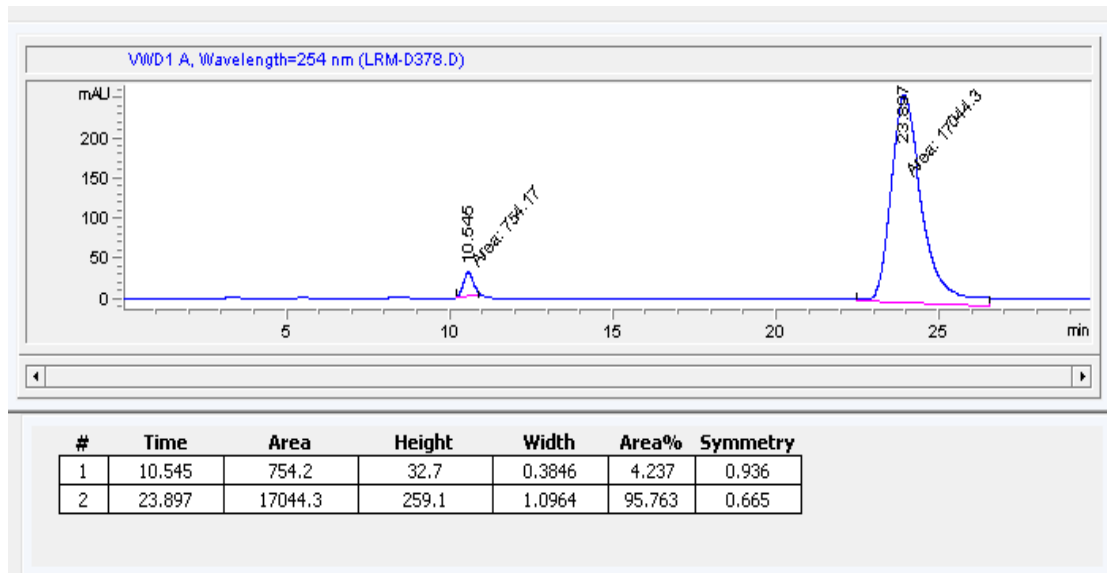

# $^1\text{H}$ and $^{13}\text{C}$ NMR of 6p

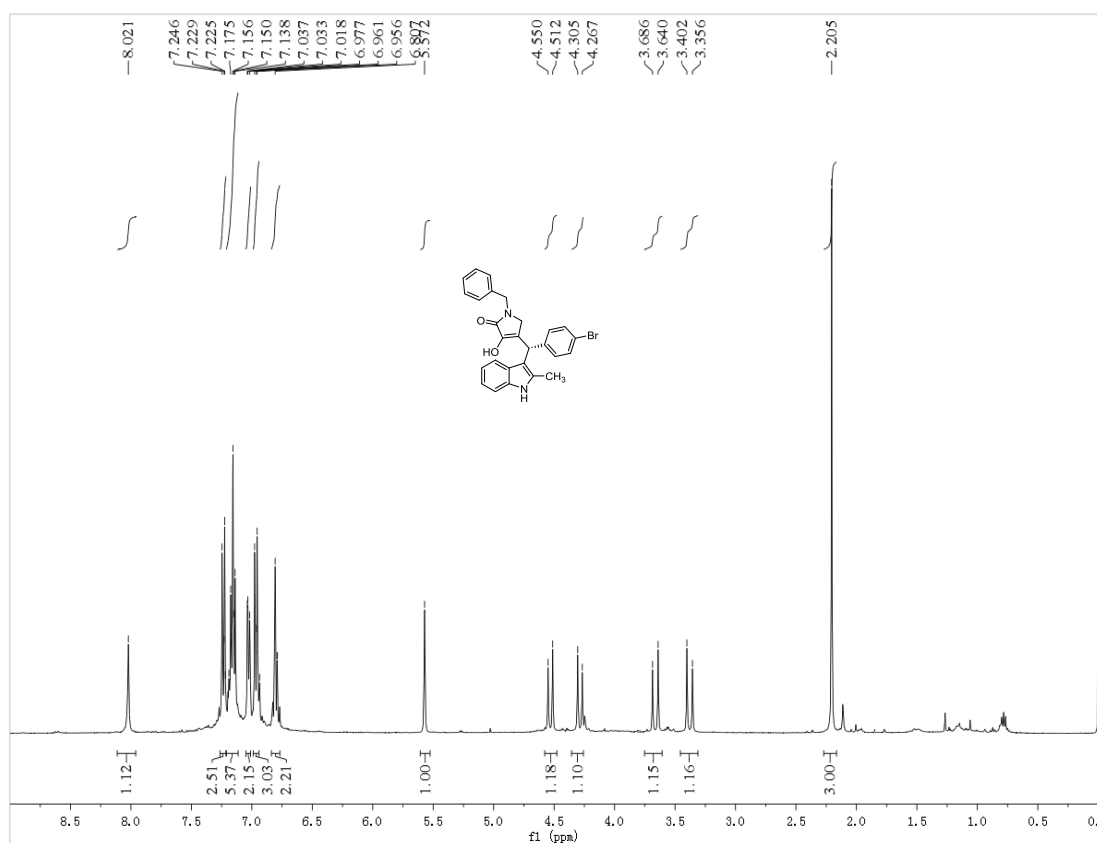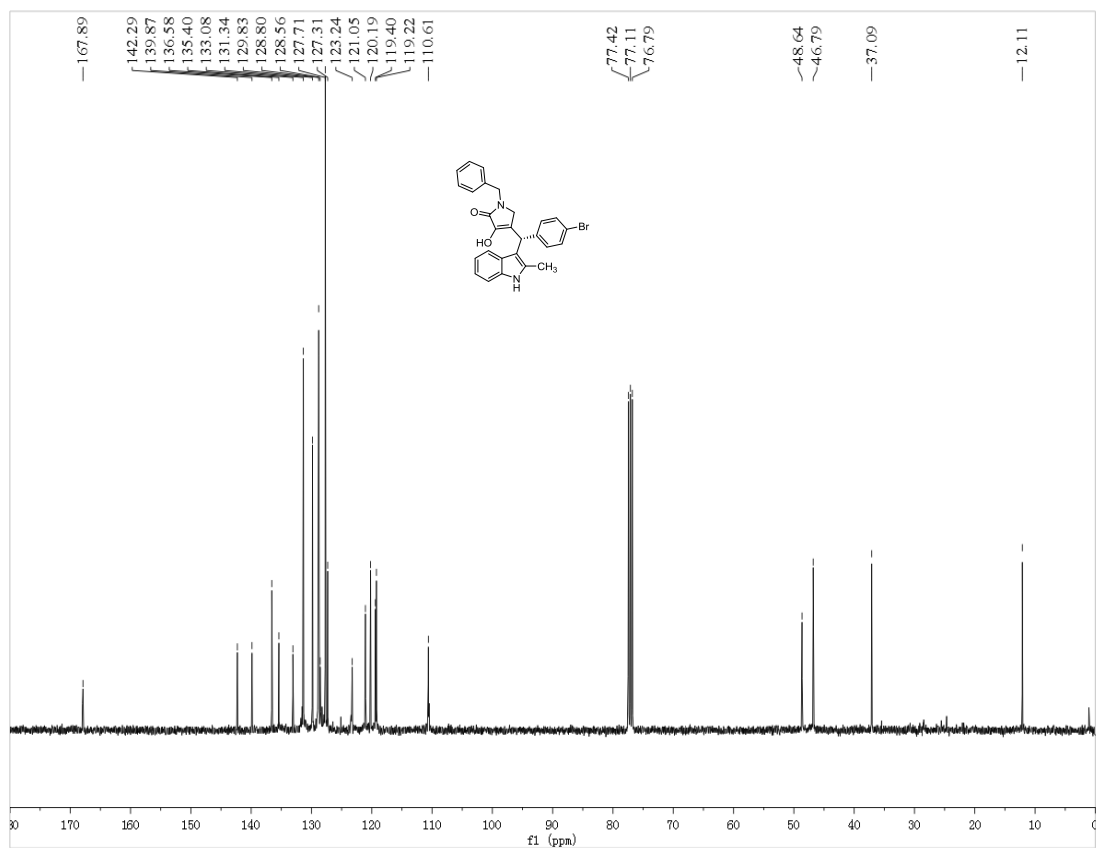



## HPLC of 6p

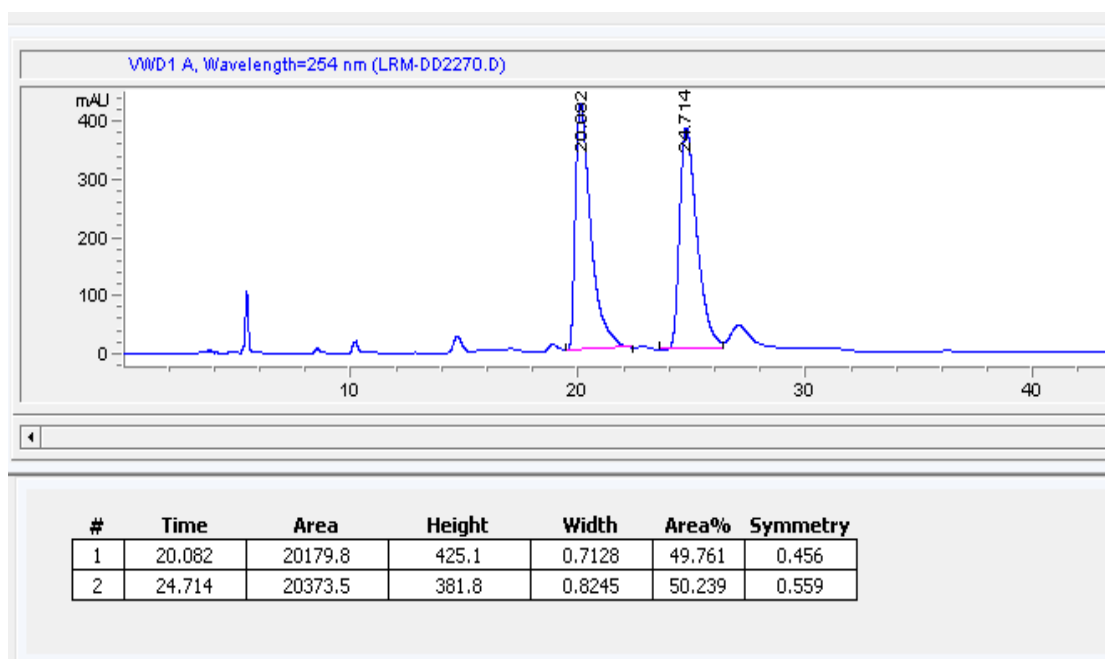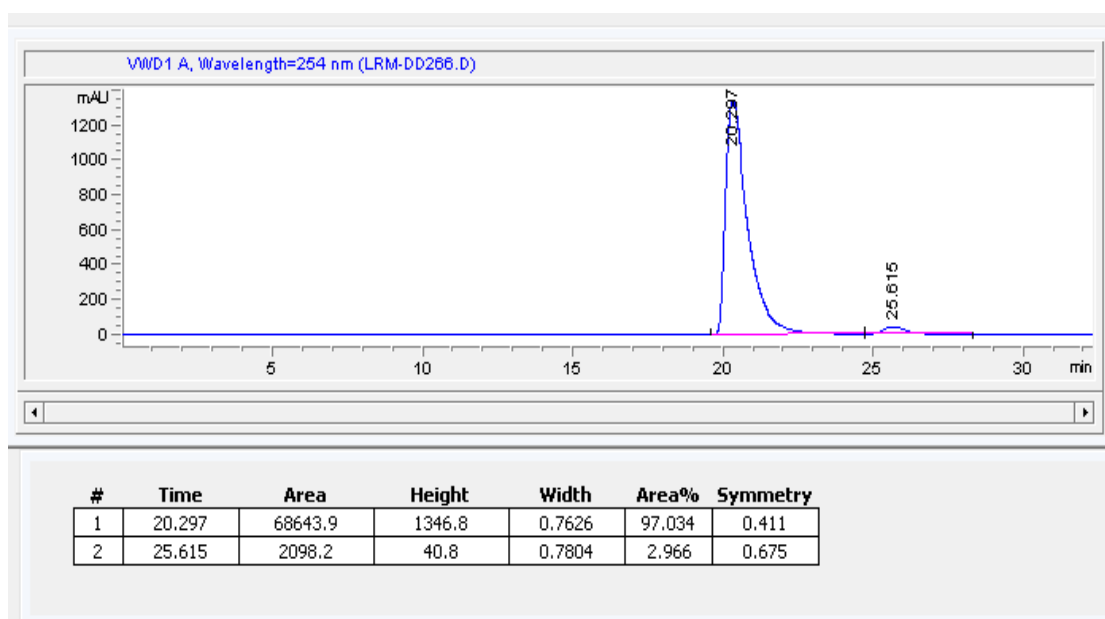

# <sup>1</sup>H and <sup>13</sup>C NMR of 6q

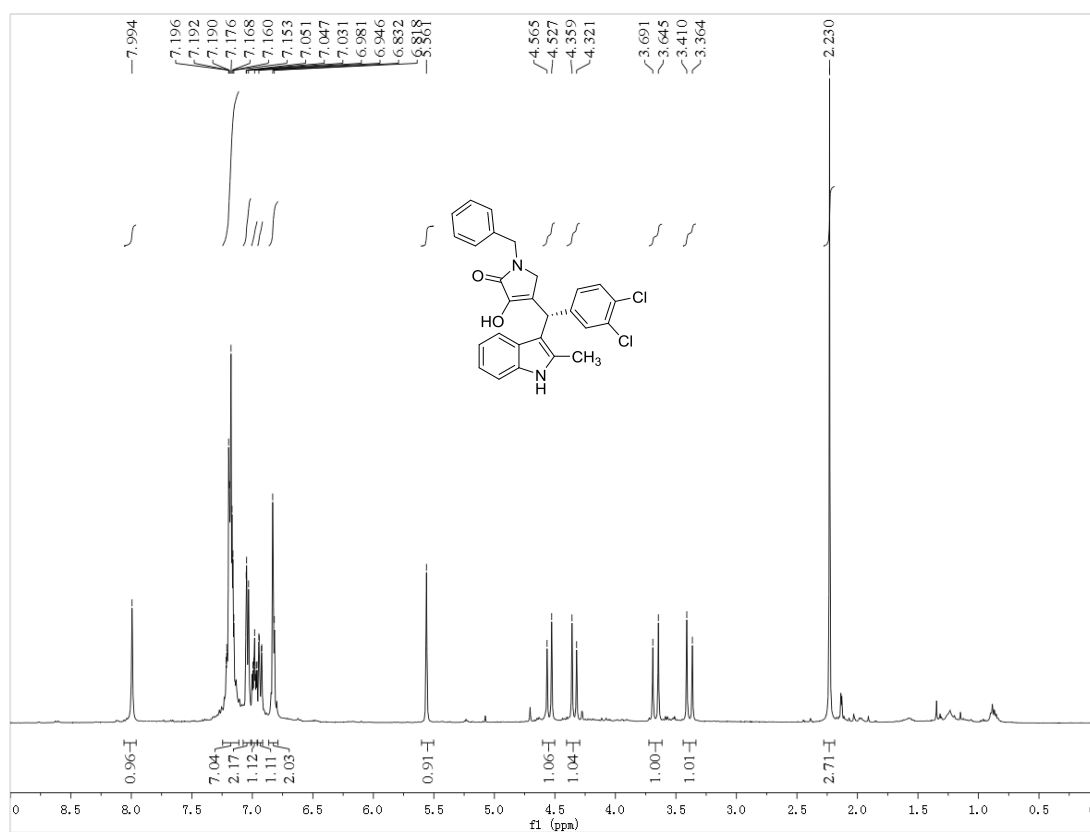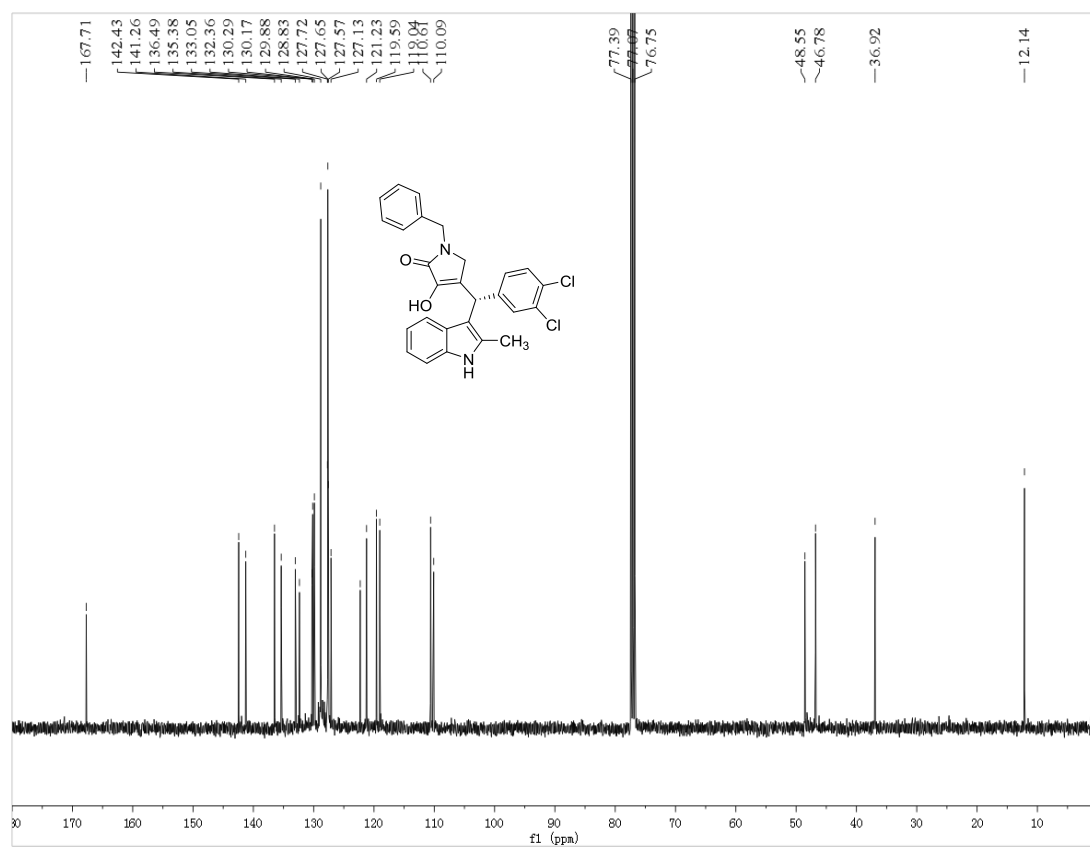

### HPLC of 6q

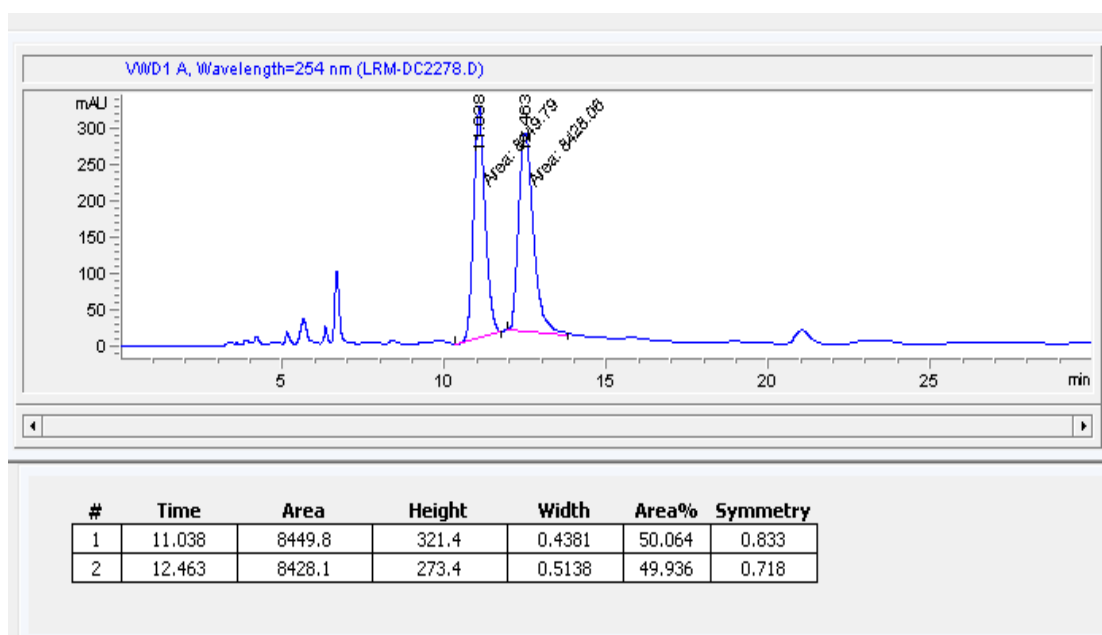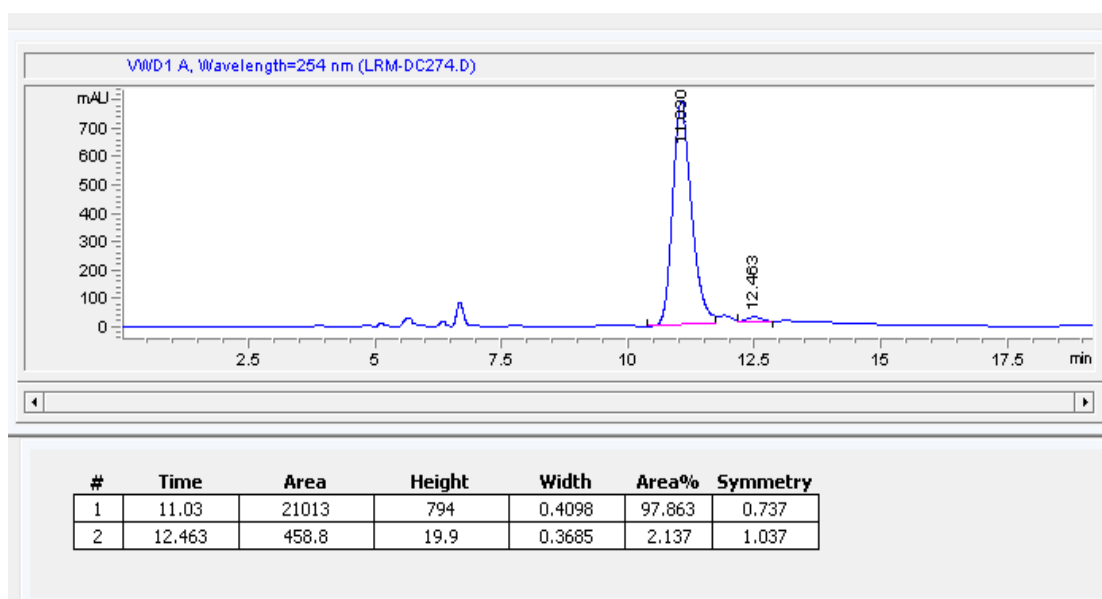

# $^1\text{H}$ and $^{13}\text{C}$ NMR of 6r

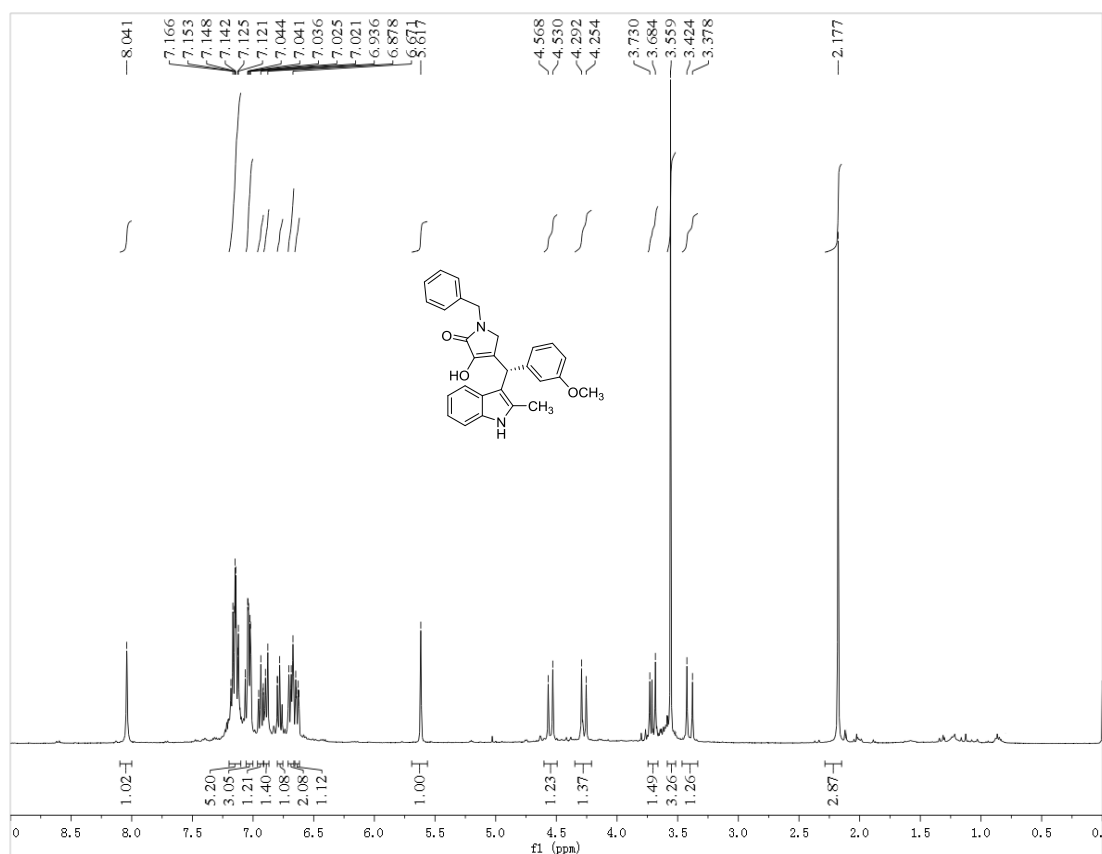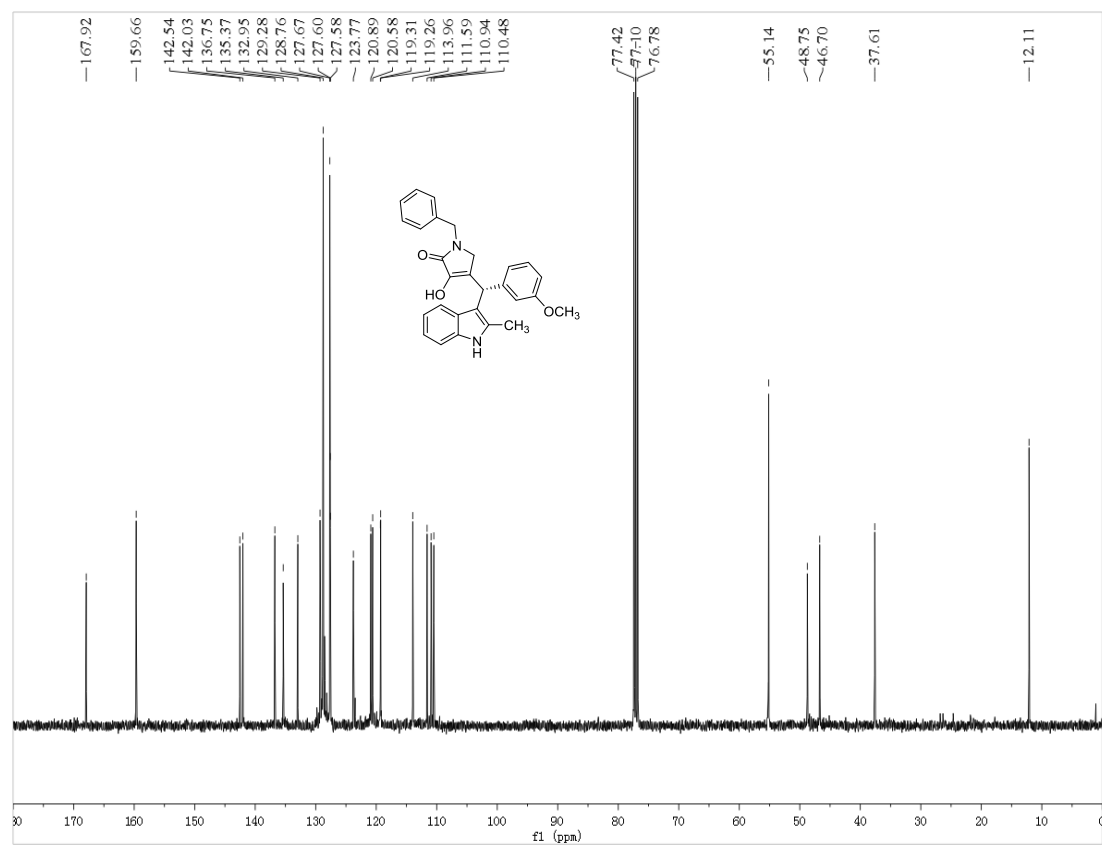

### HPLC of 6r

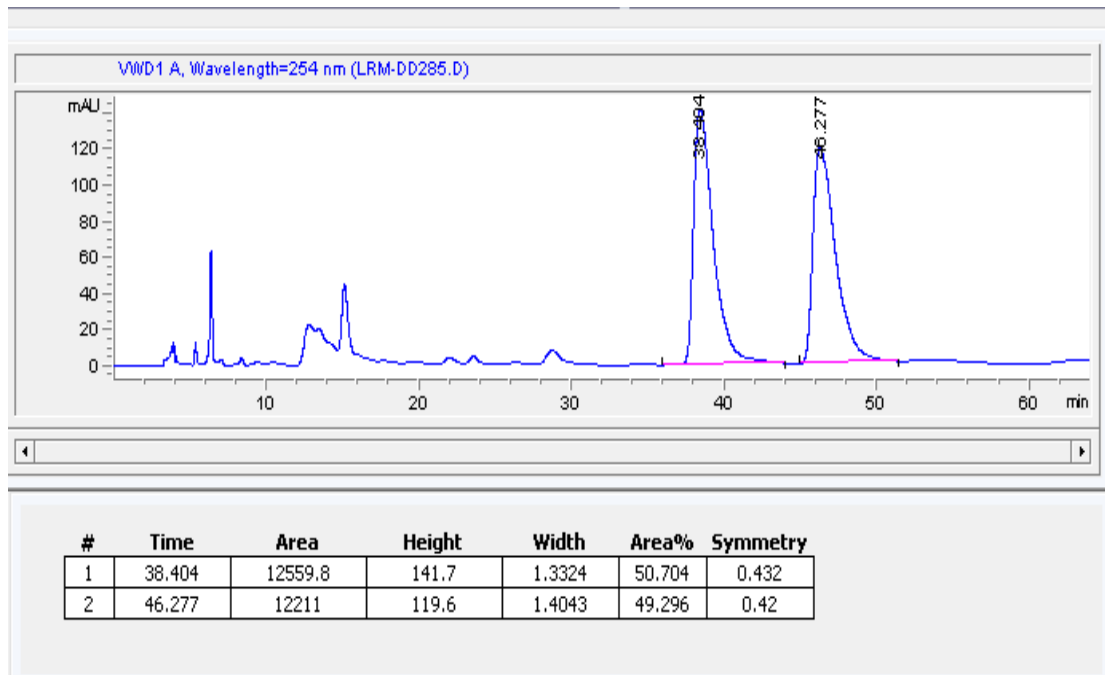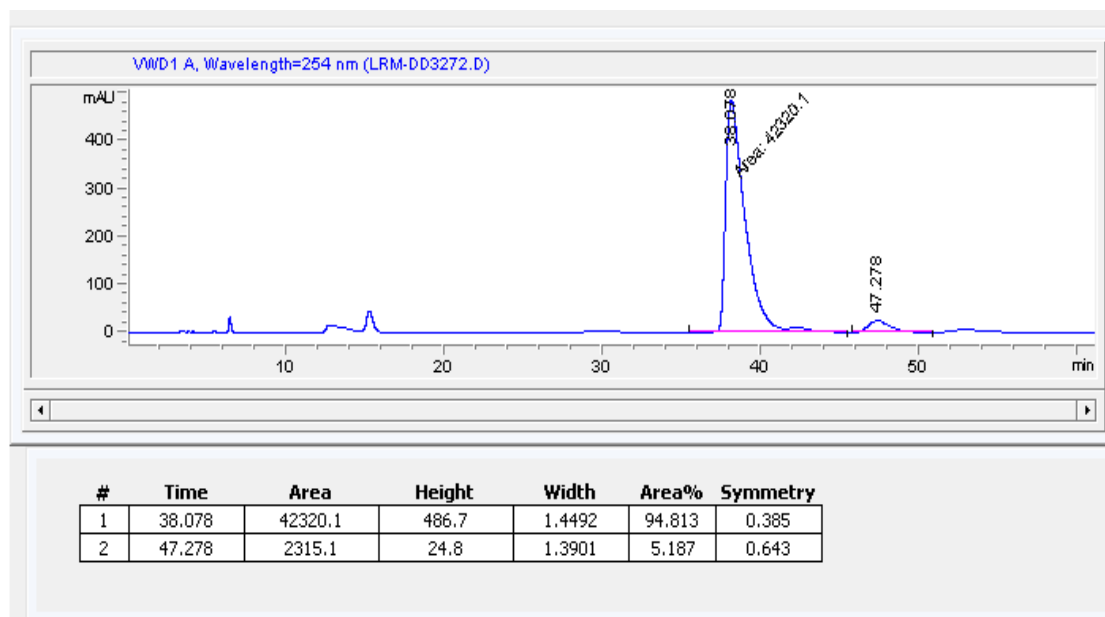

# $^1\text{H}$ and $^{13}\text{C}$ NMR of 6s

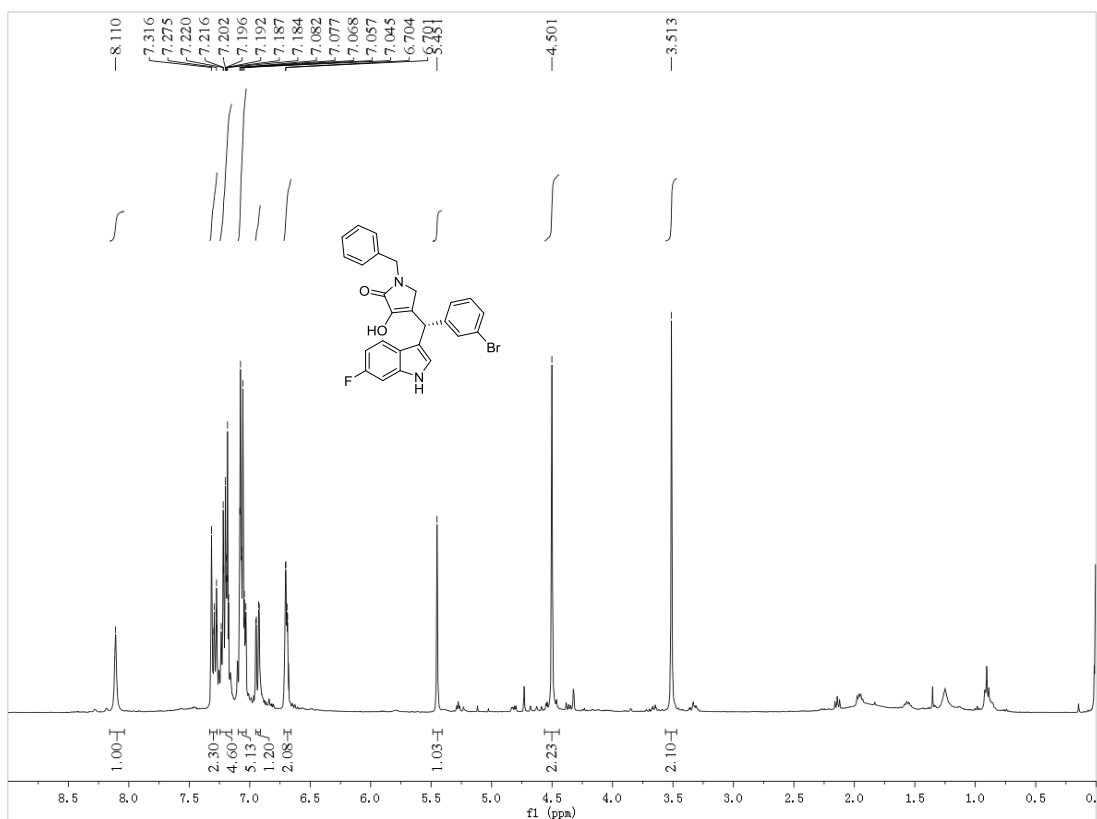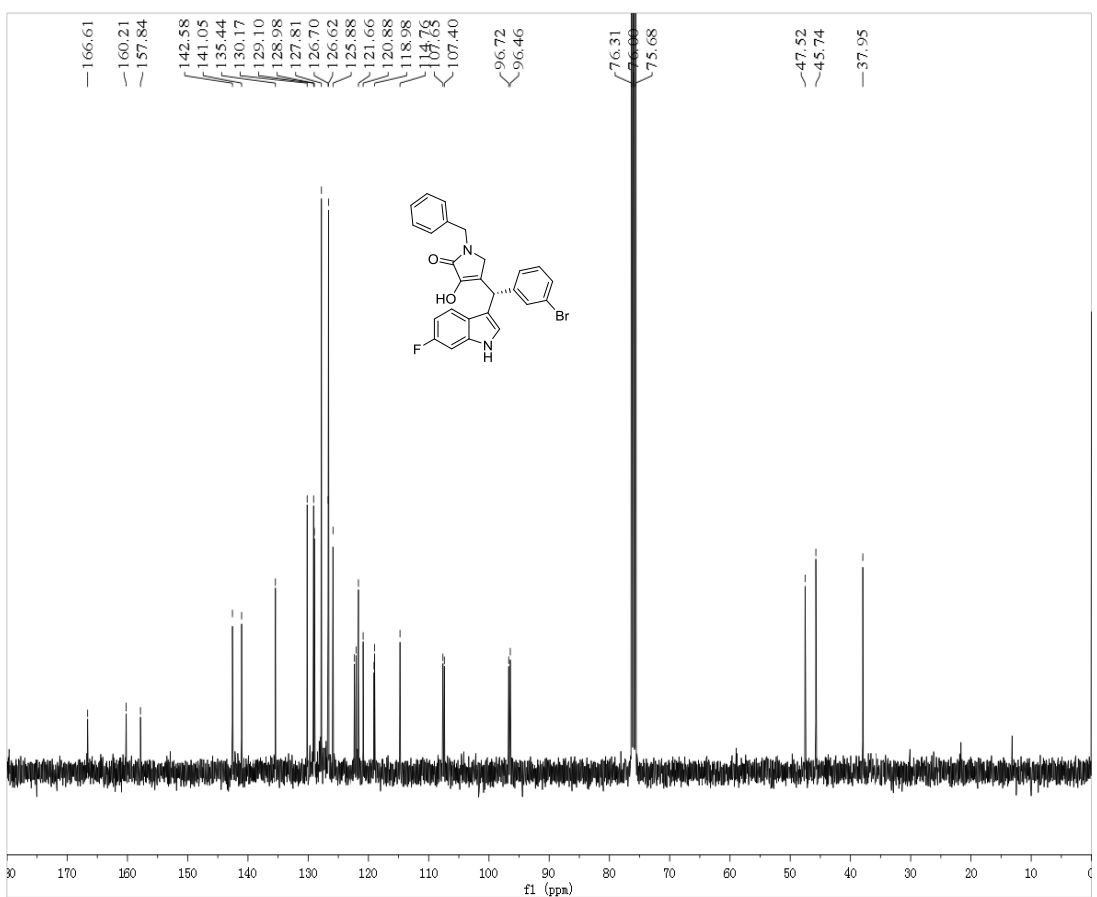

### HPLC of 6s

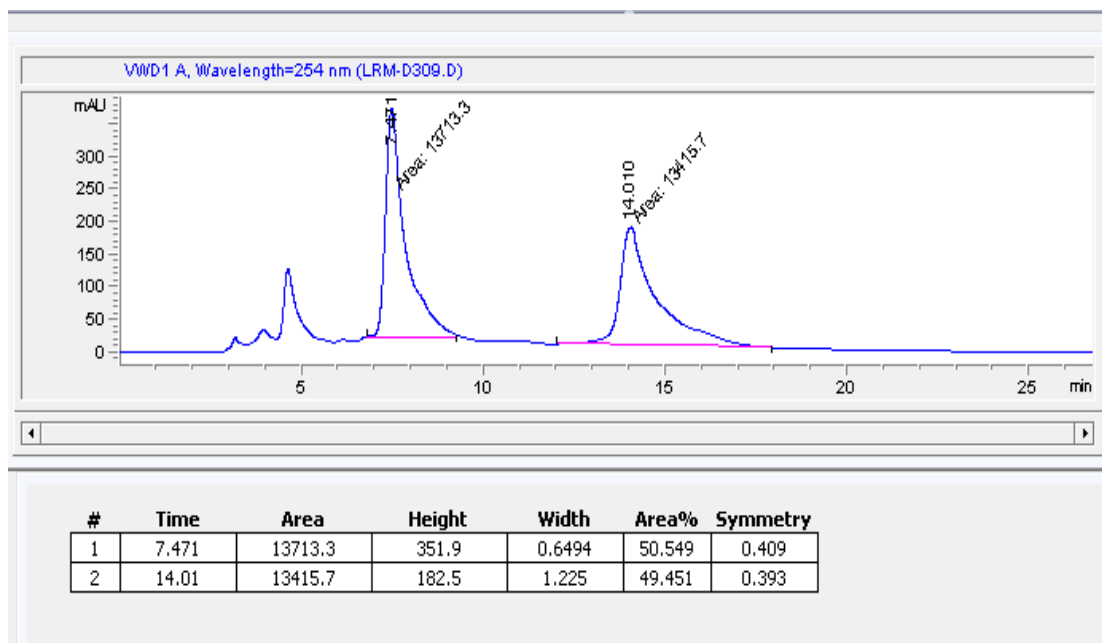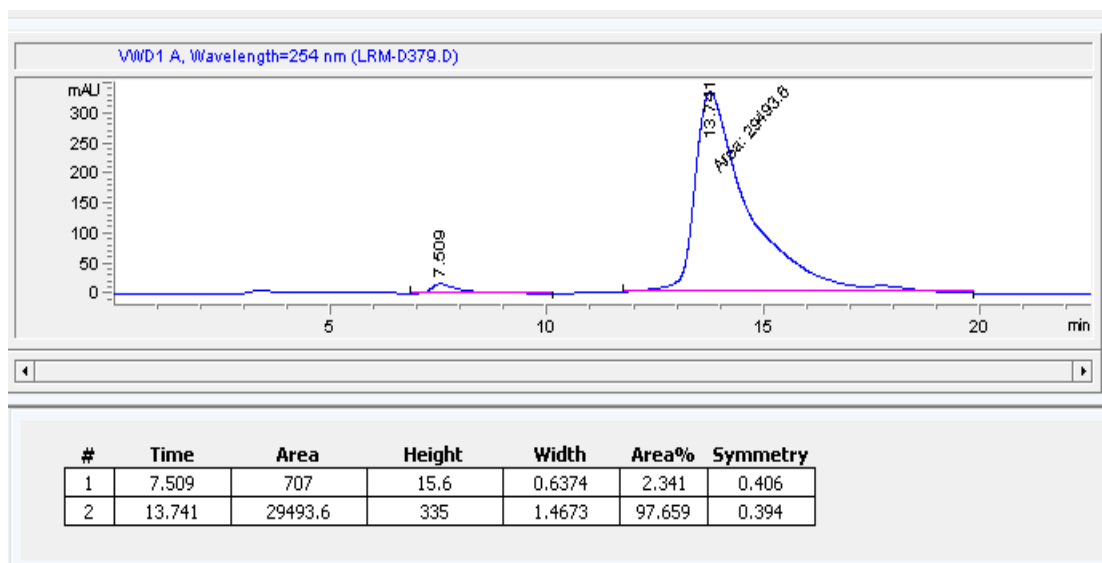

# <sup>1</sup>H and <sup>13</sup>C NMR of 6t

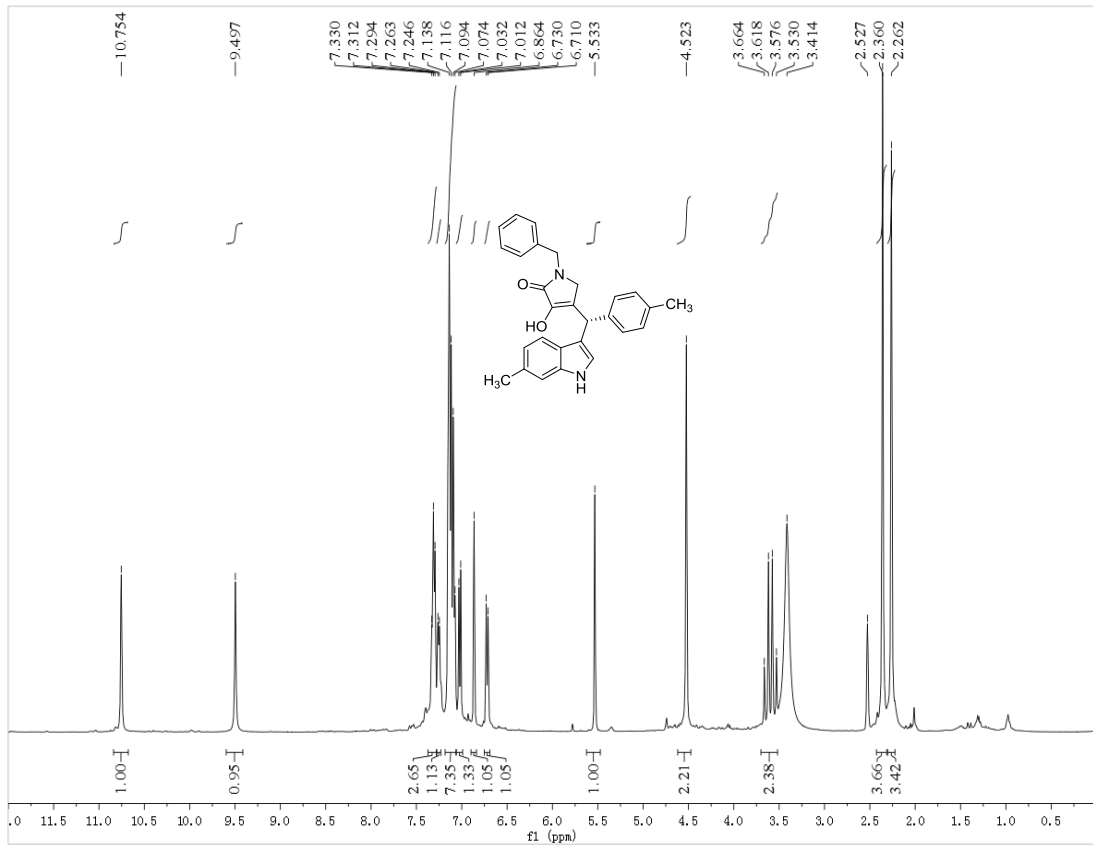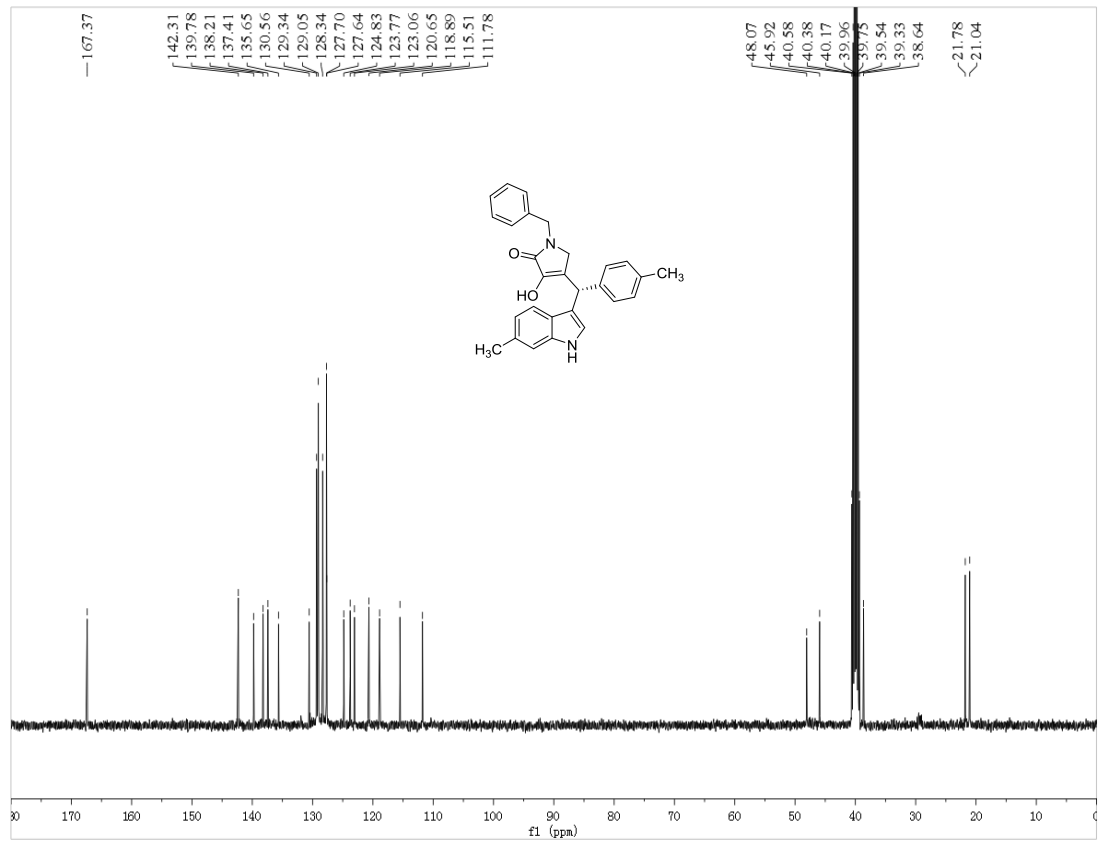



### HPLC of 6t

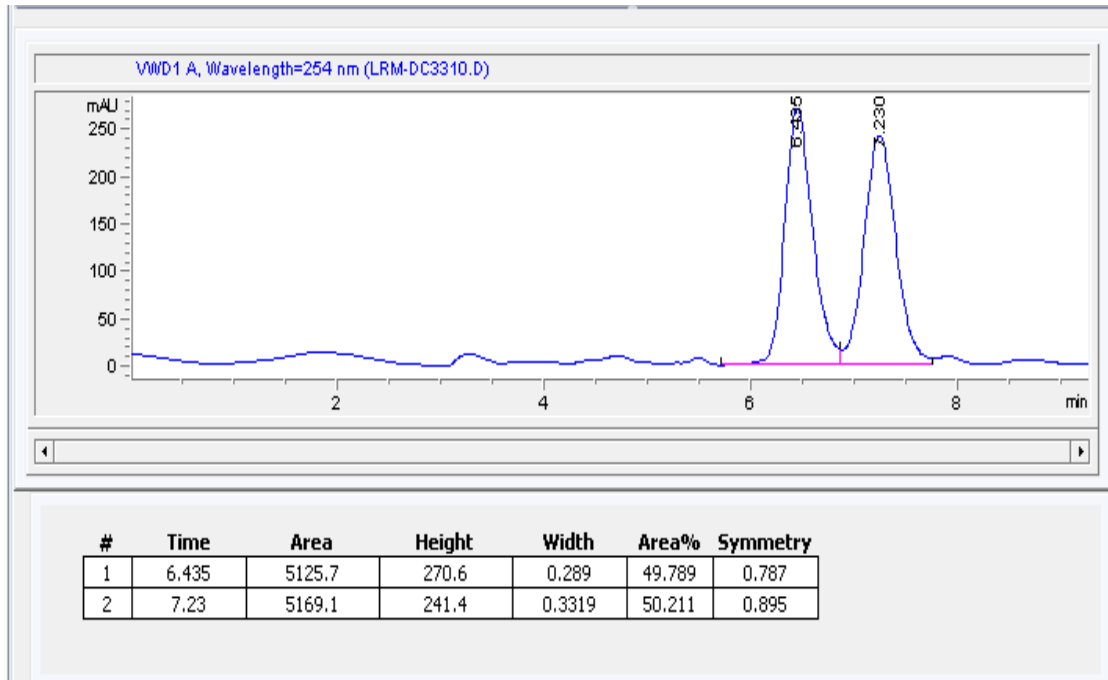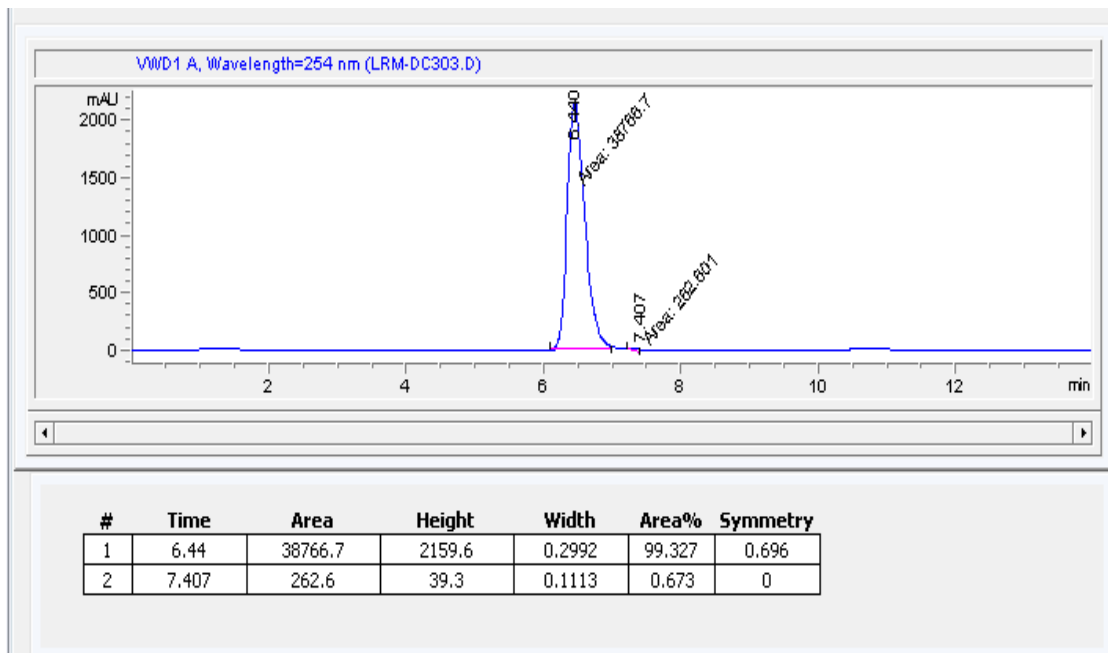

Supplement: d2qo01508k1.pdf [file d2qo01508k1.pdf]
